# Supplementary material for: De-imFAR phase II project: a study protocol for a cluster randomised implementation trial to evaluate the effectiveness of de-implementation strategies to reduce low-value statin prescribing in the primary prevention of cardiovascular disease
Source: PubMed Central journal article supplement — BMJ Open. 2024 Apr 17;14(4):e078692. doi: 10.1136/bmjopen-2023-078692 (PMC11029292; doi:10.1136/bmjopen-2023-078692), 2024-04-17
Supplement: bmjopen-2023-078692.draft_revisions.pdf [file bmjopen-2023-078692.draft_revisions.pdf]

# BMJ Open

BMJ Open is committed to open peer review. As part of this commitment we make the peer review history of every article we publish publicly available.

When an article is published we post the peer reviewers' comments and the authors' responses online. We also post the versions of the paper that were used during peer review. These are the versions that the peer review comments apply to.

The versions of the paper that follow are the versions that were submitted during the peer review process. They are not the versions of record or the final published versions. They should not be cited or distributed as the published version of this manuscript.

BMJ Open is an open access journal and the full, final, typeset and author-corrected version of record of the manuscript is available on our site with no access controls, subscription charges or pay-per-view fees (<http://bmjopen.bmj.com>).

If you have any questions on BMJ Open's open peer review process please email [info.bmjopen@bmj.com](mailto:info.bmjopen@bmj.com)

# BMJ Open

**The De-imFAR Phase II Project: A study protocol for a randomized implementation trial to evaluate the effectiveness of de-implementation strategies to reduce low-value statin prescribing in the primary prevention of Cardiovascular Disease.**

|                               |                                                                                                                                                                                                                                                                                                                                                                                                                                                                                                                                                                                                                                                                                                                                                                                                                                                                                                                                                                                                                                                                                                                                                                                                                                                                                                                                                                                                                                                                                                                                                                                                                                                                                                                                                                                                                                                                                                                                                                                                                                                                                                                                                                                                                                                                                                                                                                                        |
|-------------------------------|----------------------------------------------------------------------------------------------------------------------------------------------------------------------------------------------------------------------------------------------------------------------------------------------------------------------------------------------------------------------------------------------------------------------------------------------------------------------------------------------------------------------------------------------------------------------------------------------------------------------------------------------------------------------------------------------------------------------------------------------------------------------------------------------------------------------------------------------------------------------------------------------------------------------------------------------------------------------------------------------------------------------------------------------------------------------------------------------------------------------------------------------------------------------------------------------------------------------------------------------------------------------------------------------------------------------------------------------------------------------------------------------------------------------------------------------------------------------------------------------------------------------------------------------------------------------------------------------------------------------------------------------------------------------------------------------------------------------------------------------------------------------------------------------------------------------------------------------------------------------------------------------------------------------------------------------------------------------------------------------------------------------------------------------------------------------------------------------------------------------------------------------------------------------------------------------------------------------------------------------------------------------------------------------------------------------------------------------------------------------------------------|
| Journal:                      | <i>BMJ Open</i>                                                                                                                                                                                                                                                                                                                                                                                                                                                                                                                                                                                                                                                                                                                                                                                                                                                                                                                                                                                                                                                                                                                                                                                                                                                                                                                                                                                                                                                                                                                                                                                                                                                                                                                                                                                                                                                                                                                                                                                                                                                                                                                                                                                                                                                                                                                                                                        |
| Manuscript ID                 | bmjopen-2023-078692                                                                                                                                                                                                                                                                                                                                                                                                                                                                                                                                                                                                                                                                                                                                                                                                                                                                                                                                                                                                                                                                                                                                                                                                                                                                                                                                                                                                                                                                                                                                                                                                                                                                                                                                                                                                                                                                                                                                                                                                                                                                                                                                                                                                                                                                                                                                                                    |
| Article Type:                 | Protocol                                                                                                                                                                                                                                                                                                                                                                                                                                                                                                                                                                                                                                                                                                                                                                                                                                                                                                                                                                                                                                                                                                                                                                                                                                                                                                                                                                                                                                                                                                                                                                                                                                                                                                                                                                                                                                                                                                                                                                                                                                                                                                                                                                                                                                                                                                                                                                               |
| Date Submitted by the Author: | 09-Aug-2023                                                                                                                                                                                                                                                                                                                                                                                                                                                                                                                                                                                                                                                                                                                                                                                                                                                                                                                                                                                                                                                                                                                                                                                                                                                                                                                                                                                                                                                                                                                                                                                                                                                                                                                                                                                                                                                                                                                                                                                                                                                                                                                                                                                                                                                                                                                                                                            |
| Complete List of Authors:     | <p>Sanchez , Alvaro; Osakidetza-Basque Health Service, Primary Care Research Unit of Bizkaia, Deputy Directorate of Healthcare Assistance; Biocruces Bizkaia Health Research Institute</p> <p>Pijoan, Jose; Osakidetza-Basque Health Service, Clinical Epidemiology Unit; Biocruces Bizkaia Health Research Institute</p> <p>Sainz de Rozas, Rita; Osakidetza-Basque Health Service, Primary Care Pharmacy Unit, Ezkerraldea-Enkarterri-Cruces Integrated Health Organization; Biocruces Bizkaia Health Research Institute</p> <p>Lekue, Itxasne; Osakidetza-Basque Health Service, Primary Care Pharmacy Unit, Ezkerraldea-Enkarterri-Cruces Integrated Health Organization; Biocruces Bizkaia Health Research Institute</p> <p>San Vicente, Ricardo; Osakidetza-Basque Health Service, Zumarraga Health Center, Goierri-Alto Urola Integrated Health Organization</p> <p>Quindimil, Jose Antonio; Osakidetza-Basque Health Service, Sestao Health Center, Barakaldo-Sestao Integrated Health Organization</p> <p>Rotaeche, Rafael; Osakidetza-Basque Health Service, Primary Care Research Unit of Gipuzkoa, Organization of Integrated Health Services of Gipuzkoa</p> <p>Etxeberria, Arritxu ; Osakidetza-Basque Health Service, Primary Care Pharmacy, Donostialdea Integrated Health Organization</p> <p>Mozo, Carmela; Osakidetza-Basque Health Service, Primary Care Pharmacy, Donostialdea Integrated Health Organization</p> <p>Martinez-Cengotitabengoa, Monica; University of the Basque Country, School of Pharmacy; Osakidetza-Basque Health Service</p> <p>Monge, Monica; Osakidetza-Basque Health Service, Corporate Pharmacy Service, Directorate of Healthcare Assistance</p> <p>Gómez-Ramírez, Cristina; Osakidetza-Basque Health Service, Cardiology Department, Cruces University Hospital, Ezkerraldea-Enkarterri-Cruces Integrated Health Organization</p> <p>Samper, Ricardo; Osakidetza-Basque Health Service, Corporate Pharmacy Service, Directorate of Healthcare Assistance</p> <p>Ogueta Lana, Mikel ; Osakidetza-Basque Health Service, Subdirectorate of Quality and Health Information Systems</p> <p>Celorrio, Sara; Osakidetza-Basque Health Service, Barakaldo-Sestao Integrated Health Organization</p> <p>Merino-Inda, Nerea; Biocruces Bizkaia Health Research Institute</p> <p>Llarena, Marta; Biocruces Bizkaia Health Research Institute</p> |

|           |                                                                                                                                                                                                                                                                                                                                                                                                                                                                  |
|-----------|------------------------------------------------------------------------------------------------------------------------------------------------------------------------------------------------------------------------------------------------------------------------------------------------------------------------------------------------------------------------------------------------------------------------------------------------------------------|
|           | Gonzalez Saenz de Tejada, Marta; Biocruces Bizkaia Health Research Institute<br>García-Alvarez, Arturo; Osakidetza-Basque Health Service, Primary Care Research Unit of Bizkaia. Deputy Directorate of Healthcare Assistance; Biocruces Bizkaia Health Research Institute<br>Grandes, Gonzalo; Osakidetza-Basque Health Service, Primary Care Research Unit of Bizkaia. Deputy Directorate of Healthcare Assistance; Biocruces Bizkaia Health Research Institute |
| Keywords: | Primary Care < Primary Health Care, Clinical Decision-Making, Clinical Trial, PREVENTIVE MEDICINE                                                                                                                                                                                                                                                                                                                                                                |
|           |                                                                                                                                                                                                                                                                                                                                                                                                                                                                  |

SCHOLARONE™  
Manuscripts

## TITLE PAGE

### Title

**The De-imFAR Phase II Project: A study protocol for a randomized implementation trial to evaluate the effectiveness of de-implementation strategies to reduce low-value statin prescribing in the primary prevention of Cardiovascular Disease.**

**Author's details** Alvaro Sanchez<sup>1\*</sup>, Jose I. Pijoan<sup>2</sup>, Rita Sainz de Rozas<sup>3</sup>, Itxasne Lekue<sup>3</sup>, Ricardo San Vicente<sup>4</sup>, Jose Antonio Quindimil<sup>5</sup>, Rafael Rotaecche<sup>6</sup>, Arritxu Etxeberria<sup>7</sup>, Carmela Mozo<sup>7</sup>, Monica Martinez-Cengotitabengoa<sup>8</sup>, Monica Monge<sup>9</sup>, Cristina Gómez-Ramírez<sup>10</sup>, Ricardo Samper<sup>11</sup>, Mikel Ogueta Lana<sup>12</sup>, Sara Celorrio<sup>13</sup>, Nerea Merino-Inda<sup>14</sup>, Marta Llarena<sup>15</sup>, Marta Gonzalez Saenz de Tejada<sup>15</sup>, Arturo Garcia-Alvarez<sup>1</sup>, and Gonzalo Grandes<sup>1</sup>

<sup>1</sup> Primary Care Research Unit of Bizkaia, Deputy Directorate of Healthcare Assistance, Biocruces Bizkaia Health Research Institute, Basque Health Service - Osakidetza, Network for Research on Chronicity, Primary Care, and Health Promotion (RICAPPS), Barakaldo, Bizkaia, Spain.

<sup>2</sup> Clinical Epidemiology Unit, Biocruces Bizkaia Health Research Institute, Basque Health Service - Osakidetza, Barakaldo, Bizkaia, Spain. CIBER de Epidemiología y Salud Pública (CIBERESP), Instituto de Salud Carlos III, Spain.

<sup>3</sup> Primary Care Pharmacy Unit, Ezkerraldea-Enkarterri-Cruces Integrated Health Organization, Basque Health Service – Osakidetza, Biocruces Bizkaia Health Research Institute, Barakaldo, Bizkaia, Spain.

<sup>4</sup> Zumarraga Health Center, Goierri-Alto Urola Integrated Health Organization, Basque Health Service – Osakidetza, Zumárraga, Gipuzkoa, Spain.

<sup>5</sup> Sestao Health Center, Barakaldo-Sestao Integrated Health Organization, Basque Health Service – Osakidetza, Sestao, Bizkaia, Spain.

1  
2  
3 29 <sup>6</sup> Primary Care Research Unit of Gipuzkoa, Organization of Integrated Health Services  
4  
5 30 of Gipuzkoa, Donostia-San Sebastian, Gipuzkoa, Spain

6  
7 31 <sup>7</sup> Primary Care Pharmacy, Donostialdea Integrated Health Organization, Hernani,  
8  
9 32 Gipuzkoa, Spain

10  
11 33 <sup>8</sup> School of Pharmacy, University of the Basque Country UPV/EHU, Vitoria-Gasteiz,  
12  
13 34 Spain. Psychology Clinic of East Anglia, Norwich, UK. Osakidetza Basque Health  
14  
15 35 Service, Barakaldo, Spain.

16  
17 36 <sup>9</sup> Corporate Pharmacy Service, Directorate of Healthcare Assistance, Osakidetza-  
18  
19 37 Basque Health Service Central Services, Vitoria-Gasteiz, Spain

20  
21 38 <sup>10</sup> Cardiology Department, Cruces University Hospital, Ezkerraldea-Enkarterri-Cruces  
22  
23 39 Integrated Health Organization, Basque Health Service – Osakidetza, Barakaldo,  
24  
25 40 Bizkaia, Spain.

26  
27 41 <sup>11</sup> Corporate Pharmacy Service, Directorate of Healthcare Assistance, Osakidetza-  
28  
29 42 Basque Health Service Central Services, Vitoria-Gasteiz, Spain

30  
31 43 <sup>12</sup> Subdirectorate of Quality and Health Information Systems, Osakidetza-Basque Health  
32  
33 44 Service Central Services, Vitoria-Gasteiz, Spain

34  
35 45 <sup>13</sup> Barakaldo-Sestao Integrated Health Organization, Basque Health Service –  
36  
37 46 Osakidetza, Barakaldo, Spain

38  
39 47 <sup>14</sup> Biocruces Bizkaia Health Research Institute, Barakaldo, Bizkaia, Spain.

40  
41 48 <sup>15</sup> Biocruces Bizkaia Health Research Institute, Network for Research on Chronicity,  
42  
43 49 Primary Care, and Health Promotion (RICAPPS), Barakaldo, Bizkaia, Spain.

44  
45  
46  
47 50

48  
49 51 **\* Corresponding author:**

50  
51 52 Alvaro Sánchez

52  
53 53 E-mail: [Alvaro.sanchezperez@osakidetza.eus](mailto:Alvaro.sanchezperez@osakidetza.eus)

54  
55 54 Primary Care Research Unit of Bizkaia, Deputy Directorate of Healthcare Assistance,  
56  
57 55 Biocruces Bizkaia Health Research Institute, Basque Health Service – Osakidetza,  
58  
59  
60

1  
2  
3 56 Network for Research on Chronicity, Primary Care, and Health Promotion (RICAPPS).  
4  
5 57 Plaza Cruces s/n, E-48903 Barakaldo, Bizkaia, Spain.  
6  
7  
8

58

## 59 **ABSTRACT**

### 60 **Introduction**

61 This study aims to reduce potentially inappropriate prescribing (PIP) of statins and foster  
62 healthy lifestyle promotion in cardiovascular disease (CVD) primary prevention in low  
63 risk patients. To this end, the study will compare the effectiveness and feasibility of  
64 several de-implementation strategies developed following the structured design process  
65 of the Behavior Change Wheel targeting key determinants of clinical decision-making  
66 process in CVD prevention.

### 67 **Methods and analysis**

68 A randomized implementation trial, with an additional control group, will be launched,  
69 involving family physicians (FPs) from 13 Integrated Healthcare Organizations (IHOs) of  
70 Osakidetza – Basque Health Service with non-zero incidence rates of PIP of statins in  
71 2021. All FPs will be exposed to a non-reflective decision assistance strategy based on  
72 reminders and decision support tools. Additionally, FPs from two of the IHOs will be  
73 randomly assigned to one of two increasingly intensive implementation strategies:  
74 adding a decision information strategy based on knowledge dissemination, and a  
75 reflective decision structure strategy through audit/feedback. The target population  
76 comprises 45- to 74-year-old women and 40- to 74-year-old men with moderately  
77 elevated cholesterol levels but no diagnosed CVD and a low cardiovascular risk  
78 (REGICOR <7.5%), who attend at least one appointment with any of the participating  
79 FPs (May 2022-May 2023), and will be followed until May 2024. The main  
80 implementation outcome will be the change in the incidence rate of PIP of statins and  
81 healthy lifestyle counseling in the study population 12 and 24 months after health  
82 professionals' exposure to the strategies. Fidelity of the de-implementation strategies,

1  
2  
3 83 FPs' perception of their feasibility and acceptability, and patient experience regarding the  
4  
5 84 quality of treatment received will also be evaluated.  
6

7 85 **Ethics and dissemination**  
8

9 86 The study was approved by the Basque Country Clinical Research Ethics Committee  
10  
11 87 and was registered in ClinicalTrials.gov (NCT04022850). The results will be  
12  
13 88 disseminated in scientific peer-reviewed journals.  
14  
15

16 89 **Keywords:** Inappropriate Prescribing, Cardiovascular Diseases / prevention & control,  
17  
18 90 Hypercholesterolemia / drug therapy, Implementation Science, Research Design,  
19  
20 91 Primary care.  
21  
22

23 92

24  
25 93 **STRENGTHS AND LIMITATIONS OF THIS STUDY**  
26

- 27 94 • The goal of the present study is to assess the effectiveness of several de-  
28  
29 95 implementation strategies targeting primary care family physicians' (FPs)  
30  
31 96 decision-making process to reduce potentially inappropriate prescribing (PIP) of  
32  
33 97 statins and to increase healthy lifestyle promotion as the recommended treatment  
34  
35 98 option in cardiovascular disease (CVD) primary prevention through a randomized  
36  
37 99 implementation trial with an additional control group conducted in real-world  
38  
39 100 conditions of Primary Care.  
40  
41  
42 101 • The present study proposes an efficient design that combines experimental and  
43  
44 102 non-experimental comparisons through two randomized and one non-  
45  
46 103 randomized control (reference) arm that will allow: a) to capture the secular  
47  
48 104 trends across all FPs within the healthcare system that are exposed to a  
49  
50 105 reference intervention and estimating its effect on reducing PIP of statins and  
51  
52 106 increasing healthy lifestyle promotion; and b) to compare this reference strategy  
53  
54 107 with the two experimental de-implementation strategies.  
55  
56  
57 108 • The main limitation of the study lies in the planned comparisons of the  
58  
59 109 randomized groups with respect to the control arm. Therefore, in addition to  
60

1  
2  
3 110 evaluating the change in PIP incidence in all eligible FPs, a matching strategy  
4  
5 111 with the selection of one matched FP from this non-randomized group for each  
6  
7 112 of the randomized FPs will be performed seeking to increase comparability and  
8  
9 113 reduce potential bias.

- 11 114 • In order to better understand from the perspective of the study participants the  
12  
13 115 reasons why (why not) the strategies work, to explain the variations in the results  
14  
15 116 achieved and to identify the essential components and those that will require to  
16  
17 117 be optimized, qualitative methods will also be used to assess i) professionals'  
18  
19 118 perception of the feasibility and acceptability of the de-implementation strategies  
20  
21 119 aimed at reducing their unnecessary prescribing and favoring recommended  
22  
23 120 practice in the primary prevention of CVD in patients with low cardiovascular risk  
24  
25 121 (CVR); and ii) patients' perception and experiences related to receiving clinical  
26  
27 122 care derived from the exposure of their healthcare professionals to the different  
28  
29 123 de-implementation strategies.  
30  
31  
32  
33  
34  
35  
36  
37  
38

## 39 127 **INTRODUCTION**

40  
41 128 Low-value healthcare may be considered a major global problem due to the widespread  
42  
43 129 empirical evidence of its high prevalence across healthcare systems and its impact on  
44  
45 130 patient safety, resource use, and social inefficiency [1,2]. It is becoming a global priority  
46  
47 131 to reduce low-value care, that is, clinical practices (e.g., diagnostic and therapeutic  
48  
49 132 procedures) that are ineffective, have not been shown to be efficient or effective, are not  
50  
51 133 the best available option, or have a poor cost- and/or risk-to-benefit balance.  
52  
53

54 134  
55  
56 135 Nonetheless, reducing or eliminating low-value practices is a complex matter, as drivers  
57  
58 136 fostering or maintaining them seem, in most cases, to operate at multiple levels and be  
59  
60 137 context specific; therefore, there is a need for a careful process of formal analysis of the



1  
2  
3 138 problems and their mechanisms of action to design and guide effective and efficient  
4  
5 139 corrective measures. This can be achieved using models or theories that cover a wide  
6  
7 140 range of possible influences or determinants of the clinical behavior in question. In this  
8  
9 141 context, behavior change theory has been extensively applied to understand the factors  
10  
11 142 that may influence clinical behavior, identify and design possible techniques and  
12  
13 143 interventions that could be used to change it, and explain the mechanisms through which  
14  
15 144 such interventions operate [3,4].  
16

17  
18 145  
19  
20 146 The DE-imFAR (from the Spanish for de-implementation of low-value pharmacological  
21  
22 147 prescribing) project [5] aims to apply behavioral science theory within a structured  
23  
24 148 process involving the main stakeholders (health professionals, patients, and  
25  
26 149 researchers) in the design, deployment, and evaluation of targeted de-implementation  
27  
28 150 strategies for reducing potentially inappropriate prescribing (PIP). Specifically, we have  
29  
30 151 applied a combination of the Theoretical Domains Framework and Behavior Change  
31  
32 152 Wheel [6] methods to a) understand the factors that may influence problematic clinical  
33  
34 153 behavior (PIP of statins in low cardiovascular risk (CVR) patients within the context of  
35  
36 154 cardiovascular disease [CVD] primary prevention in primary care), and b) map targeted  
37  
38 155 de-implementation and implementation strategies conducive to reducing or stopping the  
39  
40 156 low-value practice in question.  
41

42  
43 157  
44  
45 158 Briefly, having prioritized a specific target behavior (clinician decision-making on  
46  
47 159 intervention/treatment to be provided based on objective clinical information and  
48  
49 160 subjective schemas and heuristics), identified determinants (facilitators of statin PIP and  
50  
51 161 barriers to recommended activities promoting healthy lifestyles), and mapped specific  
52  
53 162 behavior change techniques, three types of de-implementation/implementation  
54  
55 163 strategies were selected for influencing decision-making through different mechanisms.  
56  
57 164 The behavior change interventions selected were those judged to be the most potentially  
58  
59 165 effective, feasible, and acceptable by the DE-imFAR Phase I working group: a) a non-

1  
2  
3 166 reflective decision assistance strategy based on providing evidence-based information  
4  
5 167 communication technology tools to help and guide decision-making; b) a decision  
6  
7 168 information strategy based on the dissemination of the evidence concerning CVD  
8  
9 169 primary prevention framed in a corporate campaign encouraging family physicians (FPs)  
10  
11 170 to move away from PIP; and c) a reflective decision structure strategy encouraging  
12  
13 171 reflection on actual performance based on an audit/feedback system [7].  
14  
15  
16 172

17  
18 173 According to the evidence reviewed in Phase I of the DE-imFAR project [8-17] regarding  
19  
20 174 the evaluation of interventions for the reduction of low-value prescribing, the three  
21  
22 175 prioritized de-implementation strategies seem to be non-innovative interventions but do  
23  
24 176 address the main determinants of clinical decisions processes that perpetuate the PIP  
25  
26 177 of statins in our public healthcare setting (Osakidetza/Basque Health Service). On the  
27  
28 178 other hand, these strategies are supported by evidence as multicomponent interventions  
29  
30 179 that —combining passive dissemination interventions, based on training in or  
31  
32 180 dissemination of clinical practice guidelines (CPGs), with more proactive interventions  
33  
34 181 incorporating decision-making aids or the sending of audit/feedback— achieve the most  
35  
36 182 positive results. Specifically, in the context of PIP of statins, a positive impact has been  
37  
38 183 observed on documentation of CVR and prescription adequacy using a) multi-  
39  
40 184 component dissemination strategies including informative web pages, and  
41  
42 185 implementation of electronic CPGs compared to routine practice and training activities,  
43  
44 186 and b) interventions based on sending clinical scenarios and cases, and audit/feedback  
45  
46 187 to professionals, and decision support tools [12-16]. Research is needed, however, to  
47  
48 188 determine whether these evidence-based and barrier-specific strategies for de-  
49  
50 189 implementation identified in DE-imFAR Phase I are also effective in our context.  
51  
52  
53  
54 190

55  
56 191 Thus, the goal of the present study is to assess the potential effectiveness and feasibility  
57  
58 192 of a set of de-implementation strategies to reduce the PIP of statins in the primary  
59  
60 193 prevention of CVD (low-risk patients, REGICOR [18] CVR score <7.5%, with moderately

1  
2  
3 194 elevated cholesterol levels, low-density lipoprotein (LDL) cholesterol levels between 70  
4  
5 195 and 189 mg/dL and/or total cholesterol (TC) between 200 and 289 mg/dL, but without  
6  
7 196 ischemic heart disease/CVD). The de-implementation strategies are derived from a  
8  
9 197 systematic theory- and evidence-based intervention design process and composed of a  
10  
11 198 set of active components targeting the facilitators of the non-desired behavior (PIP of  
12  
13 199 statins) while tackling the barriers to applying the recommended clinical practice behavior  
14  
15 200 (healthy lifestyle promotion) [7].  
16  
17  
18 201

19  
20 202 Specifically, we aim to answer the following research questions:

21  
22 203 1. Observational comparison questions:

23  
24 204 As compared to a reference/control non-reflective decision assistance strategy based on  
25  
26 205 reminders and decision support tools incorporated into the electronic health record  
27  
28 206 (EHR) for helping clinical decision-making, what is the effect on the incidence of PIP of  
29  
30 207 statins in CVD primary prevention and the rate of delivery of healthy lifestyle counseling  
31  
32 208 of a) a decision information strategy comprising a corporate “Stopping Low-Value  
33  
34 209 Prescribing” campaign and the dissemination of evidence-based CPGs for the primary  
35  
36 210 prevention of CVD; b) a reflective decision structure strategy based on an audit/feedback  
37  
38 211 system; and c) any intervention based on a reflective de-implementation strategy (a or  
39  
40 212 b)?  
41  
42

43 213

44  
45 214 2. Experimental comparison question:

46  
47 215 As compared to a decision information strategy comprising a corporate “Stopping Low-  
48  
49 216 Value Prescribing” campaign and the dissemination of evidence-based CPGs for the  
50  
51 217 primary prevention of CVD, together with the non-reflective decision assistance  
52  
53 218 intervention based on reminders and decision support tools incorporated into the EHR  
54  
55 219 for helping clinical decision-making, what is the effect on the incidence of PIP of statins  
56  
57 220 in CVD primary prevention and the rate of delivery of healthy lifestyle counseling of  
58  
59 221 adding a reflective decision structure strategy based on an audit/feedback system?  
60

1  
2  
3 2224  
5 223 **METHODS AND ANALYSIS**6  
7 224 **Design**

8  
9 225 A randomized implementation trial with an additional control group will be conducted for  
10  
11 226 evaluating the potential effectiveness and feasibility of three de-implementation  
12  
13 227 strategies (Figure 1). A mixed methods evaluation will be undertaken: quantitative for  
14  
15 228 assessing the implementation results at the professional level (implementation outcomes  
16  
17 229 regarding changes in rates of PIP and healthy lifestyle counseling) and qualitative for  
18  
19 230 assessing the feasibility and perceived impact of the de-implementation strategies from  
20  
21 231 the FPs' perspective and the experience and satisfaction of patients concerning the  
22  
23 232 clinical care received. The unit of intervention will be the primary care FP, while  
24  
25 233 observation and analysis will be performed at professional and patient levels. The DE-  
26  
27 234 imFAR research protocol was reviewed and approved by the Basque Country Clinical  
28  
29 235 Research Ethics Committee (Reference: EOM2022018, approved on 30 March 2022)  
30  
31 236 and was registered in the U.S. NLM ClinicalTrials.gov database (ClinicalTrials.gov  
32  
33 237 Identifier NCT04022850, Registered 17 July 2019; Last update 28 July 2023).

34  
35  
36 238

37  
38 239 Osakidetza provides universal coverage and services are free at the point of use, aside  
39  
40 240 from co-payment for drugs, funded through regional general taxation. Primary,  
41  
42 241 specialized, and social health-related service provision is organized around 13  
43  
44 242 Integrated Healthcare Organizations (IHOs) that cover the 3 provinces of the region of  
45  
46 243 the Basque Country: Araba, Bizkaia, and Gipuzkoa. Each resident is on the list of one  
47  
48 244 FP or pediatrician who offers comprehensive primary care and refers patients for hospital  
49  
50 245 and specialty services. Primary care professionals work in full-time teams, including FPs,  
51  
52 246 pediatricians, nurses, and administrative staff based at local centers providing access to  
53  
54 247 healthcare for users in a defined geographical area.

55  
56 248 We used the SPIRIT reporting guidelines and the SPIRIT checklist when writing the  
57  
58 249 present study [19].  
59  
60

250

**251 Participants**

252 1. Professionals: FPs belonging to any of the 13 IHOs of Osakidetza with a non-zero  
253 annual incidence rate of PIP of statins at baseline (2021) with a minimum cluster size of  
254  $n \geq 10$  patients

255 2. Patients: All 40- to 74-year-old men and 45- to 74-year-old women with no history of  
256 statin use, LDL cholesterol levels between 70 and 189 mg/dL and/or TC between 200  
257 and 289 mg/dL but without ischemic heart disease/CVD, and an estimated CVR  
258 REGICOR  $< 7.5\%$  who attend at least one appointment at the participating FPs' practices  
259 during the study period from May 2022 to May 2023, and followed until May 2024.

260

**261 Clinical interventions**

262 According to clinical practice recommendations in Osakidetza and the Spanish National  
263 Health System [20], although there is evidence that statins reduce the risk of  
264 cardiovascular events in secondary prevention and individuals with high CVR, for primary  
265 prevention in low-risk patients (REGICOR  $< 10\%$ ), the risk-benefit balance is uncertain.  
266 Specifically, in patients with low CVR, preventive activities should be focused on the  
267 promotion of healthy lifestyles through optimizing diet, increasing physical activity, and  
268 stopping smoking. Moreover, the NICE guideline on CVR management and reduction  
269 [21] and the 2019 ACC/AHA guideline on the primary prevention of CVD [22] encourage  
270 discussion with patients concerning the benefits of lifestyle modification for the  
271 prevention of CVD, as well as other modifiable risk factors, before considering  
272 pharmacological treatment. They also stress the importance of discussing the risks and  
273 benefits of pharmacological treatment, taking into account patient preferences and  
274 conditions. Similarly, the 2019 ESC/EAS guidelines for the management of dyslipidemias  
275 [23] recommend healthy eating, regular exercise, and smoking cessation as the first line  
276 of treatment for hyperlipidemia.

277

## 278 **De-implementation strategies evaluated**

279 There is plenty of evidence demonstrating that it is possible to de-implement  
280 inappropriate medical practices through the lens of clinician cognition [24-26]. In this  
281 context, the growing field of choice architecture aims to explore how the structure and  
282 framing of decision situations influence the choice of certain behaviors over alternative  
283 ones. On the one hand, FPs' decision-making ability can be influenced by unconscious  
284 processes that occur in response to environmental or emotive cues, that is, through type  
285 1 (or automatic) cognition. On the other, clinicians' conscious intention to change can be  
286 promoted by engaging their reflective cognition to consciously evaluate and correct their  
287 inappropriate behavior, that is, using type 2 (or reflective) cognition [27].

288

289 Within the present study, three types of strategies that purportedly affect FPs' decision-  
290 making process will be set up. The strategies can be theoretically differentiated as a  
291 function of the way they may affect clinicians' decision-making [28] and will be  
292 cumulatively deployed (see Supplemental file 1 for a more detailed description):

293 1) *A non-reflective decision assistance strategy*, that targets type 1 cognitive processes  
294 through decision support systems that prompt and remind FPs about the recommended  
295 practice in a simplified way, thereby reducing the cognitive burden. In short, pop-up  
296 reminders and alerts with associated messages were incorporated into the REGICOR  
297 CVR calculator in OSABIDE (Osakidetza's EHR system) and within the prescription  
298 pathway in PRESBIDE (the electronic drug prescribing component). The tools devised  
299 include an interactive media-based algorithm stating the recommended practice for the  
300 primary prevention of CVD in low-risk patients developed by an expert panel, and a  
301 patient information sheet depicting and promoting evidence-based practice for  
302 addressing cholesterol in the primary prevention of CVD in low-risk patients.

303 2) *A both reflective and non-reflective decision information strategy*, targeting both types  
304 1 and 2 cognitive processes, based on the principle of knowledge dissemination and  
305 consisting of a "Stopping Low-Value Prescribing" campaign run by the organization that

1  
2  
3 306 also eases access (decreasing the physical effort required) to the evidence-based CPGs  
4  
5 307 for the primary prevention of CVD in low-risk patients.

6  
7 308 3) *A reflective decision structure strategy*, that targets type 2 cognition through an  
8  
9 309 audit/feedback system reporting data with practice- and organizational-level  
10  
11 310 performance indicators regarding PIP of statins and healthy lifestyle promotion to prompt  
12  
13 311 reflection about their own care practice, provided along with intention formation and goal-  
14  
15 312 setting-focused messages.

### 17 313 **Allocation of intervention units to compared groups**

18  
19  
20 314 All FPs from all 13 IHOs will be exposed to the first of the aforementioned strategies,  
21  
22 315 namely, the provision of non-reflective decision assistance strategy. Further, in addition  
23  
24 316 to this first strategy, FPs belonging to two IHOs (Barakaldo-Sestao and Ezkerraldea-  
25  
26 317 Enkarterri-Cruces) in which the DE-imFAR project has been previously commissioned  
27  
28 318 [7] will be randomly assigned to exposure to either the second (provision of decision  
29  
30 319 information strategy) or second and third (provision of decision information and reflective  
31  
32 320 decision structure strategies). The allocation sequence within these two groups will be  
33  
34 321 generated using a specific restricted randomization scheme by one member of the  
35  
36 322 research team. The sequence will be concealed at the coordinating center. In all cases,  
37  
38 323 FPs will only be allocated to the study groups after they have provided informed consent  
39  
40 324 to participate through an opt-out strategy. The data analyst and the staff in charge of  
41  
42 325 measurements will be blind to FP allocation to study arms. Given that the audit/feedback  
43  
44 326 strategy will involve regular reports sent privately to individuals, participants in the  
45  
46 327 experimental arms are also expected to be blind to group allocation.

47  
48  
49 328

### 51 329 **Outcome measures**

52  
53 330 To assess the effectiveness of the de-implementation strategies compared in terms of  
54  
55 331 public health impact, we will use the following dimensions of the Reach, Effectiveness,  
56  
57 332 Adoption, Implementation, and Maintenance (RE-AIM) framework [29]:

58  
59 333 *Reach*

1  
2  
3 334 • Percentage of patients in the target population exposed to the recommended CVD  
4  
5 335 primary prevention practice (e.g., assessment and advice regarding healthy lifestyles  
6  
7 336 instead of statins), 12 months following FP's exposure to the experimental or control de-  
8  
9 337 implementation strategies; and their representativeness.

11 338 *Adoption*

13 339 • Percentage of FPs who improve their CVD prevention practice, by reducing PIP of  
14  
15 340 statins and/or increasing health promotion activities in the target population eligible for  
16  
17 341 CVD prevention, 12 months following FP's exposure to the allocated or control de-  
18  
19 342 implementation strategies; and their representativeness.

22 343 *Implementation*

24 344 The study's main outcome measures will compare the change in the incidence of both  
25  
26 345 the PIP of statins and the health promotion activities in patients of the target population  
27  
28 346 eligible for CVD primary prevention, from baseline to 12 months after exposure of  
29  
30 347 collaborating FPs to the de-implementation strategies. Specifically, the two following  
31  
32 348 measures will be compared:

34 349 • Change in the incidence of PIP of statins

36 350 and

38 351 • Change in the incidence of provision of advice regarding healthy lifestyles, in both  
39  
40 352 cases, considering the change, from baseline to 12 months after exposure of FPs to the  
41  
42 353 de-implementation strategies compared, in the target population.

44 354

46 355 As a secondary implementation outcome, we will compare the change in the incidence  
47  
48 356 of CVR score documentation in the EHR, from baseline to 12 months after exposure of  
49  
50 357 FPs to the de-implementation strategies compared, in 40- to 74-year-old men and 45- to  
51  
52 358 74-year-old women with no history of statin use and without ischemic heart disease/CVD  
53  
54 359 but who have been newly prescribed statins during the fieldwork period.

56 360

58 361 *Maintenance and Spreading*



1  
2  
3 362 • Change in the incidence of PIP of statins and provision of healthy lifestyle counseling  
4  
5 363 in eligible patients, 24 months after exposure of FPs to the de-implementation strategies  
6  
7 364 compared to levels observed at the 12-month assessment.  
8

9 365

### 11 366 **Fidelity and Feasibility Evaluation**

13 367 The fidelity of the delivery of each de-implementation strategy under study (i.e., the  
14  
15 368 degree to which they have been executed as planned) will be evaluated. To this end, a  
16  
17 369 complete record and subsequent description of the execution process, documentation of  
18  
19 370 adaptations made to the planned strategies, and process indicators of the delivery of and  
20  
21 371 exposure to the interventions (see Supplemental file 1 for specification of the exposure  
22  
23 372 to each strategy), will be used to assess the following components of fidelity: adherence,  
24  
25 373 dose, quality of delivery, professionals' responsiveness and program differentiation [30].  
26  
27 374

28  
29  
30 375 The professionals' perception of the feasibility of and satisfaction with the de-  
31  
32 376 implementation strategies to enhance the provision of the recommended CVD  
33  
34 377 prevention clinical practice will be assessed through key-informant semi-structured  
35  
36 378 interviews. At least 12 interviews with professionals will be carried out: 6 professionals  
37  
38 379 (3 from each randomized arm) who reduced their PIP and 6 who did not. Exposed  
39  
40 380 patients' perception and experience regarding the quality of CVD prevention care  
41  
42 381 received will also be assessed through key-informant semi-structured interviews: at least  
43  
44 382 five interviews will be carried out with patients who have and five with patients who have  
45  
46 383 not been clinically managed according to recommended practice.  
47  
48 384

### 51 385 **Analysis**

53 386 Frequencies and proportions along with the corresponding 95% confidence intervals  
54  
55 387 (CIs) will be used to describe the prevalence and cumulative incidence of PIP of statins  
56  
57 388 and healthy lifestyle counseling in the primary prevention of CVD by FPs. The primary  
58  
59 389 effectiveness outcomes will be the changes in the cumulative incidence of PIP of statins

1  
2  
3 390 and healthy lifestyle counseling in patients from the target population (individuals with no  
4  
5 391 history of statin use, LDL cholesterol levels between 70 and 189 mg/dL and/or TC  
6  
7 392 between 200 and 289 mg/dL without past or current ischemic heart disease/CVD, and  
8  
9 393 an estimated CVR REGICOR <7.5% attending at least one clinical appointment with their  
10  
11 394 FP in the study period), from baseline to 12 months after exposure of FPs to the de-  
12  
13 395 implementation strategies. Therefore, to evaluate the impact of the three de-  
14  
15 396 implementation strategies, we will estimate the relative reduction in the risk of receiving  
16  
17 397 PIP of statins in patients from the target population assigned to the experimental  
18  
19 398 interventions over that in patients from the non-randomized group (non-reflective  
20  
21 399 decision assistance strategy group). With respect to this group and seeking to increase  
22  
23 400 comparability and reduce potential bias, in addition to evaluating the change in PIP  
24  
25 401 incidence in all eligible FPs, we will select one matched FP from this non-randomized  
26  
27 402 group for each of the randomized FPs taking into account both FP-related characteristics  
28  
29 403 (e.g., baseline rate of PIP, etc.) and characteristics of the population of patients assigned  
30  
31 404 to the FP (e.g., average socioeconomic status, etc.). Change in PIP incidence rates from  
32  
33 405 baseline to those observed 12 and 24 months after FPs' exposure to the de-  
34  
35 406 implementation strategies and the relative risk reduction will be estimated with the  
36  
37 407 corresponding 95% CIs. To adjust for potential confounding factors, stratified statistical  
38  
39 408 analyses and logistic models will be used. These models will be extended to generalized  
40  
41 409 mixed effects models to take into account the hierarchical structure of data (patients  
42  
43 410 nested in FPs and FPs in primary care teams), with fixed effects (comparison group,  
44  
45 411 effect of time on outcome indicators, and time-group interactions) and random effects on  
46  
47 412 the intercept and the time slope (for each patient, FP, center, etc.). These models will be  
48  
49 413 adjusted for potential confounders, following a backward strategy, guided by the stratified  
50  
51 414 analyses. A similar approach will be taken to analyze the secondary outcomes. The  
52  
53 415 analyses will be carried out with SAS (v. 9.2, SAS Institute, Cary, NC, USA), and R (R  
54  
55 416 Development Core Team, 2014).  
56  
57  
58  
59  
60 417

1  
2  
3 418 Calculation of the required sample size for the most unfavorable scenario, this being the  
4  
5 419 comparison between the two randomized de-implementation strategies, was based on:  
6  
7 420 i) a baseline incidence of statin PIP of 7.4% estimated among the patients of the target  
8  
9 421 population seen in 2021 by FPs with an incidence of PIP > 0% with a minimum cluster  
10  
11 422 size  $n \geq 10$  patients, ii) an intra-class correlation coefficient of 0.01, iii) an average cluster  
12  
13 423 size of 39 patients with a coefficient of variation of 0.63, iv)  $\alpha = 0.05$  and statistical power  
14  
15 424 of 80%, and v) hypothetical decreases in annual PIP rates of 20% in the decision  
16  
17 425 information strategy group and 50% in the decision structure strategy group. With these  
18  
19 426 assumptions, it was estimated that at least 58 FPs were required for each experimental  
20  
21  
22 427 arm.  
23  
24  
25

### 26 429 **Management, quality, and safety in data processing**

28 430 This study will be carried out in accordance with the international standards for  
29  
30 431 conducting epidemiological studies, included in the International Guidelines for Ethical  
31  
32 432 Review of Epidemiological Studies [31]. This is a prospective intervention study focused  
33  
34 433 mainly on the collection of information from data recorded by health professionals in the  
35  
36 434 Osakidetza EHR (OSABIDE) under routine clinical practice conditions. The process  
37  
38 435 indicators related to the clinical practice of the professionals, and patients'  
39  
40 436 sociodemographic and clinical characteristics (age, sex, socioeconomic status, active  
41  
42 437 health problems, etc.) and clinical outcomes will be extracted from OSABIDE through the  
43  
44 438 corporate Oracle Business Intelligence platform. The Primary Care Research Unit of  
45  
46 439 Bizkaia is formally authorized to extract and use data from the EHR for research  
47  
48 440 purposes by the Healthcare Directorate of Osakidetza. On the other hand, it will be  
49  
50 441 necessary to inform participants about the study and obtain their written informed  
51  
52 442 consent concerning the information collected directly from the professionals and patients  
53  
54 443 under study through the key-informant semi-structured interviews. All the information  
55  
56 444 regarding the study subjects, either extracted from EHRs or collected from the  
57  
58 445 participants expressly for this research, will be protected and treated confidentially for all  
59  
60

1  
2  
3 446 purposes, in accordance with the provisions of the Spanish Organic Law 3/2018, of 5  
4  
5 447 December, on Personal Data Protection and digital rights guarantee (LOPD-GDD) and  
6  
7 448 the provisions of Regulation (EU) 2016/679 of the European Parliament and of the  
8  
9 449 Council of 27 April 2016, on the protection of natural persons with regard to the  
10  
11 450 processing of personal data and on the free movement of such data (General Data  
12  
13 451 Protection Regulation, RGPD). Specifically, all data will be documented anonymously  
14  
15 452 and de-identified, linked to a unique key that is meaningless outside the context of the  
16  
17 453 system. The final resulting database will be exported to a formatted plain text file that will  
18  
19 454 then be compressed and encrypted using a secure algorithm and subsequently be  
20  
21 455 processed and included in a robust and secure database server.  
22  
23  
24  
25

#### 26 457 **Patient and public involvement**

27  
28 458 Patients were involved in the DE-imFAR Phase I project as one of the main stakeholders  
29  
30 459 (health professionals, patients, and researchers) in the formative process conducted to  
31  
32 460 map and design de-implementation strategies to reduce PIP, which will be evaluated in  
33  
34 461 the DE-imFAR Phase II project. Specifically, during the Phase I project, a focus group  
35  
36 462 with six patients was conducted to ascertain patients' experience regarding the clinical  
37  
38 463 practice of statin prescription and triangulate physicians discourse.  
39  
40

41  
42 464 During the Phase II project, semi-structured interviews will be conducted with patients to  
43  
44 465 assess their perception and experience of the clinical care received as a result of their  
45  
46 466 healthcare professionals' exposure to the different de-implementation strategies. These  
47  
48 467 interviews will help to better understand from the perspective of the study participants  
49  
50 468 the reasons why the strategies work (or do not work), to explain the variations in the  
51  
52 469 outcomes achieved and to identify the key components and those that need to be  
53  
54 470 optimized.  
55

56  
57 471

#### 58 59 472 **ETHICS AND DISSEMINATION**

60

1  
2  
3 473 The research protocol (version 1; 170221) has been approved by the Basque Country  
4  
5 474 Clinical Research Ethics Committee (Reference: EOM2022018, approved on 30 March  
6  
7 475 2022) and was registered in the U.S. NLM ClinicalTrials.gov database (ClinicalTrials.gov  
8  
9 476 Identifier NCT04022850, Registered 17 July 2019; Last update 28 July 2023).The  
10  
11 477 Primary Care Research Unit of Bizkaia is explicitly authorized by the Healthcare  
12  
13 478 Directorate of Osakidetza - Basque Health Service to extract and use data from EHRs  
14  
15 479 for research purposes. Since data supporting the present study will mostly concern  
16  
17 480 routine data retrieved from the EHR of the Basque Health Service-Osakidetza, it will be  
18  
19 481 only shared on justified request to the study guarantors. The results of this study will be  
20  
21 482 disseminated via publication in scientific peer-reviewed journals.  
22  
23  
24  
25

483

#### 484 **LIST OF ABBREVIATIONS**

485 EHR: Electronic health record

486 CI: Confidence interval

487 CVD: Cardiovascular disease

488 CVR: Cardiovascular risk

489 CPG: Clinical practice guideline

490 FP: Family physician

491 IHO: Integrated Healthcare Organization

492 LDL: Low-density lipoprotein

493 PIP: Potentially inappropriate prescribing

494 RE-AIM: Reach, Effectiveness, Adoption, Implementation, and Maintenance

495 TC: Total cholesterol

496

#### 497 **FULL REFERENCES**

498 1. Institute of Medicine (US) Committee on Quality of Health Care in America. Crossing the Quality Chasm:  
499 A New Health System for the 21st Century. Washington (DC): National Academies Press (US); 2001.

500

- 1  
2  
3 501 2. Chassin MR, Galvin RW. The urgent need to improve health care quality. Institute of Medicine National  
4 502 Roundtable on Health Care Quality. *JAMA*. 1998;280(11):1000-5. doi:10.1001/jama.280.11.1000.  
5 503  
6  
7 504 3. Michie S, Johnston M, Abraham C, et al. Making psychological theory useful for implementing evidence  
8 505 based practice: a consensus approach. *Qual Saf Health Care*. 2005;14(1):26-33.  
9 506 doi:10.1136/qshc.2004.011155.  
10 507  
11  
12 508 4. Eccles M, Grimshaw J, Walker A, et al. Changing the behavior of healthcare professionals: the use of  
13 509 theory in promoting the uptake of research findings. *J Clin Epidemiol*. 2005;58(2):107-112.  
14 510 doi:10.1016/j.jclinepi.2004.09.002.  
15 511  
16  
17 512 5. Sanchez A, Pijoan JI, Pablo S, et al. Addressing low-value pharmacological prescribing in primary  
18 513 prevention of CVD through a structured evidence-based and theory-informed process for the design and  
19 514 testing of de-implementation strategies: the DE-imFAR study. *Implement Sci*. 2020;15(1):8. Published 2020  
20 515 Jan 22. doi:10.1186/s13012-020-0966-3  
21 516  
22  
23 517 6. Michie S, van Stralen MM, West R. The behaviour change wheel: a new method for characterising and  
24 518 designing behaviour change interventions. *Implement Sci*. 2011 23;6:42. Published 2011 Apr 23.  
25 519 doi:10.1186/1748-5908-6-42.  
26 520  
27  
28 521 7. Sanchez A, Elizondo-Alzola U, Pijoan JI, et al. Applying the behavior change wheel to design de-  
29 522 implementation strategies to reduce low-value statin prescription in primary prevention of cardiovascular  
30 523 disease in primary care. *Front Med (Lausanne)*. 2022;9:967887. Published 2022 Oct 13.  
31 524 doi:10.3389/fmed.2022.967887.  
32 525  
33  
34 526 8. Prasad V, Ioannidis JP. Evidence-based de-implementation for contradicted, unproven, and aspiring  
35 527 healthcare practices. *Implement Sci*. 2014;9:1. Published 2014 Jan 8. doi:10.1186/1748-5908-9-1.  
36 528  
37  
38 529 9. Grimshaw JM, Thomas RE, MacLennan G, et al. Effectiveness and efficiency of guideline dissemination  
39 530 and implementation strategies. *Health Technol Assess*. 2004;8(6):iii-iv, 1-72. doi:10.3310/hta8060.  
40 531  
41  
42 532 10. Jamtvedt G, Young JM, Kristoffersen DT, et al. Audit and feedback: effects on professional practice and  
43 533 health care outcomes. *Cochrane Database Syst Rev*. 2006;(2):CD000259. Published 2006 Apr 19.  
44 534 doi:10.1002/14651858.CD000259.pub2.  
45 535  
46  
47 536 11. Kawamoto K, Houlihan CA, Balas EA, et al. Improving clinical practice using clinical decision support  
48 537 systems: a systematic review of trials to identify features critical to success. *BMJ*. 2005;330(7494):765.  
49 538 doi:10.1136/bmj.38398.500764.8F.  
50 539  
51  
52 540 12. Keller H, Kronen T, Becker A, et al. Arriba: effects of an educational intervention on prescribing behaviour  
53 541 in prevention of CVD in general practice. *Eur J Prev Cardiol*. 2012;19(3):322-9.  
54 542 doi:10.1177/1741826711404502.  
55 543  
56  
57  
58  
59  
60

1  
2  
3  
4  
5  
6  
7  
8  
9  
10  
11  
12  
13  
14  
15  
16  
17  
18  
19  
20  
21  
22  
23  
24  
25  
26  
27  
28  
29  
30  
31  
32  
33  
34  
35  
36  
37  
38  
39  
40  
41  
42  
43  
44  
45  
46  
47  
48  
49  
50  
51  
52  
53  
54  
55  
56  
57  
58  
59  
60

- 544 13. Arcoraci V, Santoni L, Ferrara R, et al. Effect of an educational program in primary care: the case of lipid  
545 control in cardio-cerebrovascular prevention. *Int J Immunopathol Pharmacol*. 2014;27(3):351-63.  
546 doi:10.1177/039463201402700305.
- 547
- 548 14. Dormuth CR, Carney G, Taylor S, et al. A randomized trial assessing the impact of a personal printed  
549 feedback portrait on statin prescribing in primary care. *J Contin Educ Health Prof*. 2012;32(3):153-62.  
550 doi:10.1002/chp.21140.
- 551
- 552 15. Harris MF, Parker SM, Litt J, et al. Implementing guidelines to routinely prevent chronic vascular disease  
553 in primary care: the Preventive Evidence into Practice cluster randomised controlled trial. *BMJ Open*.  
554 2015;5(12):e009397. Published 2015 Dec 11. doi:10.1136/bmjopen-2015-009397.
- 555
- 556 16. Liddy C, Hogg W, Singh J, et al. A real-world stepped wedge cluster randomized trial of practice  
557 facilitation to improve cardiovascular care. *Implement Sci*. 2015;10:150. Published 2015 Oct 28.  
558 doi:10.1186/s13012-015-0341-y.
- 559
- 560 17. Colla CH, Mainor AJ, Hargreaves C, et al. Interventions Aimed at Reducing Use of Low-Value Health  
561 Services: A Systematic Review. *Med Care Res Rev*. 2017;74(5):507-550. doi:10.1177/1077558716656970.
- 562
- 563 18. D'Agostino RB Sr, Grundy S, Sullivan LM, et al. Validation of the Framingham coronary heart disease  
564 prediction scores: results of a multiple ethnic groups investigation. *JAMA*. 2001;286(2):180-187.  
565 doi:10.1001/jama.286.2.180.
- 566
- 567 19 Chan A-W, Tetzlaff JM, Altman DG, et al. SPIRIT 2013 Statement: Defining standard protocol items for  
568 clinical trials. *Ann Intern Med*. 2013 Feb 5;158(3):200-207. doi: 10.7326/0003-4819-158-3-201302050-  
569 00583.
- 570
- 571 20. Grupo de trabajo de la Guía de Práctica Clínica sobre el manejo de los lípidos como factor de riesgo  
572 cardiovascular. *Guía de Práctica Clínica sobre el manejo de los lípidos como factor de riesgo cardiovascular*.  
573 Ministerio de Sanidad, Servicios Sociales e Igualdad. OSTEBA; 2017. Guías de Práctica Clínica en el SNS.  
574
- 575 21. National Institute for Health and Care Excellence. Cardiovascular disease: risk assessment and  
576 reduction, including lipid modification. [London]: NICE; 2014. [updated 2023 Feb 10] (Clinical guideline  
577 [CG181]). Available from: <https://www.nice.org.uk/guidance/cg181>.
- 578
- 579 22. Arnett DK, Blumenthal RS, Albert MA, et al. 2019 ACC/AHA Guideline on the Primary Prevention of  
580 Cardiovascular Disease: A Report of the American College of Cardiology/American Heart Association Task  
581 Force on Clinical Practice Guidelines [published correction appears in *Circulation*. 2019 Sep  
582 10;140(11):e649-e650] [published correction appears in *Circulation*. 2020 Jan 28;141(4):e60] [published  
583 correction appears in *Circulation*. 2020 Apr 21;141(16):e774]. *Circulation* 2019;140(11):e596-e646.  
584 doi:10.1161/CIR.0000000000000678.
- 585
- 586 23. Mach F, Baigent C, Catapano AL, et al. 2019 ESC/EAS Guidelines for the management of  
587 dyslipidaemias: lipid modification to reduce cardiovascular risk [published correction appears in *Eur Heart J*.  
588 2020 Nov 21;41(44):4255]. *Eur Heart J*. 2020;41(1):111-188. doi:10.1093/eurheartj/ehz455.

- 1  
2  
3 589  
4 590 24. Last BS, Buittenheim AM, Timon CE, Mitra N, et al. Systematic review of clinician-directed nudges in  
5 591 healthcare contexts. *BMJ Open*. 2021;11(7):e048801. Published 2021 Jul 12. doi:10.1136/bmjopen-2021-  
6 592 048801.  
7  
8 593  
9 594 25. Yoong SL, Hall A, Stacey F, et al. Nudge strategies to improve healthcare providers' implementation of  
10 595 evidence-based guidelines, policies and practices: a systematic review of trials included within Cochrane  
11 596 systematic reviews. *Implement Sci*. 2020;15(1):50. Published 2020 Jul 1. doi:10.1186/s13012-020-01011-  
12 597 0.  
13  
14 598  
15 599 26. Lamprell K, Tran Y, Arnold G, et al. Nudging clinicians: A systematic scoping review of the literature. *J*  
16 600 *Eval Clin Pract*. 2021;27(1):175-192. doi:10.1111/jep.13401.  
17 601  
18 602 27. Helfrich CD, Rose AJ, Hartmann CW, et al. How the dual process model of human cognition can inform  
19 603 efforts to de-implement ineffective and harmful clinical practices: A preliminary model of unlearning and  
20 604 substitution. *J Eval Clin Pract*. 2018;24(1):198-205. doi:10.1111/jep.12855.  
21 605  
22 606 28. Münscher R, Vetter M, Scheuerle T. A review and taxonomy of choice architecture techniques. *J Behav*  
23 607 *Decis Mak*. 2016;29(5):511-24. doi.org/10.1002/bdm.1897.  
24 608  
25 609 29. Glasgow RE, Vogt TM, Boles SM. Evaluating the public health impact of health promotion interventions:  
26 610 the RE-AIM framework. *Am J Public Health*. 1999;89(9):1322-7. doi:10.2105/ajph.89.9.1322.  
27 611  
28 612 30. Sánchez A, Rogers HL, Pablo S, et al. Fidelity evaluation of the compared procedures for conducting  
29 613 the PVS-PREDIAPS implementation strategy to optimize diabetes prevention in primary care. *BMC Fam*  
30 614 *Pract*. 2021;22(1):34. Published 2021 Feb 11. doi:10.1186/s12875-021-01378-z.  
31 615  
32 616 31. Council for International Organizations of Medical Sciences (CIOMS) in collaboration with the World  
33 617 Health Organization (WHO). *International Ethical Guidelines for Biomedical Research Involving Human*  
34 618 *Subjects*. Geneva, Switzerland: Council for International Organizations of Medical Sciences (CIOMS); 2002.  
35 619  
36 620  
37  
38  
39  
40  
41  
42  
43  
44

## 621 **AUTHORS' CONTRIBUTIONS**

622 AS, JIP, and GG conceived the idea and are the study guarantors. They are primarily  
623 responsible for the study design and planning, obtained funding, will be responsible for  
624 project coordination and supervision, analysis and interpretation of results, and were  
625 responsible for manuscript preparation. RSR, IL, RSV, JAQ, RR, AE, CM, MMC, MM,  
626 CGR, RS, MOL, SC, NMI, ML, MGST, and AGA are co-investigators of the projects and  
627 collaborated in the study design and/or manuscript preparation; and they will be  
628 responsible for study coordination and interpretation of results. AS, JIP, and AGA will be



1  
2  
3 629 responsible for the analysis of results. All authors read and approved the final version of  
4  
5 630 the manuscript.

6  
7 631

## 8 9 632 **FUNDING STATEMENT**

10  
11 633 This project has been funded by Instituto de Salud Carlos III (ISCIII), co-funded by the  
12  
13 634 European Union (European Regional Development Fund “A way to make Europe”),  
14  
15 635 through the projects: PI21/00025, RD16/0007/0002, and co-funded by the European  
16  
17 636 Union – NextGenerationEU funds, that finance the actions of the Recovery and  
18  
19 637 Resilience Facility (Mecanismo para la Recuperación y la Resiliencia -MRR), through  
20  
21 638 the project RD21/0016/0003. This project has also been funded by the Health  
22  
23 639 Department of the Basque Government (funded projects 2018111085 and 2021111024).  
24  
25 640 The funding bodies have had no role in the design of the study, collection, analysis, or  
26  
27 641 interpretation of data or the writing of the manuscript.  
28  
29

30  
31 642

## 32 33 643 **COMPETING INTERESTS STATEMENT**

34  
35 644 The authors declare that they have no competing interests.  
36  
37 645

## 38 39 646 **ACKNOWLEDGMENTS**

40  
41 647 The authors would like to thank the following colleagues in the Basque Health Service  
42  
43 648 (Osakidetza) for their support: Gaspar Lantarón Amas (Subdirectorate of Care  
44  
45 649 Integration) and Nagore Zarraonandia Ayo (Directorate of Care Integration) at  
46  
47 650 Ezkerraldea-Enkarterri-Cruces Integrated Health Organization, Lourdes Vivanco  
48  
49 651 (Medical Directorate) and Vanesa Martín (Quality Unit) at Barakaldo-Sestao Integrated  
50  
51 652 Health Organization.  
52  
53

54  
55 653

## 56 57 654 **WORD COUNT**

1  
2  
3 655 3763 words excluding title page, abstract, strengths and limitations of this study, list of  
4  
5 656 abbreviations, full references, authors' contributions, funding statement, competing  
6  
7 657 interests statement and acknowledgements.  
8  
9  
10  
11  
12  
13  
14  
15  
16  
17  
18  
19  
20  
21  
22  
23  
24  
25  
26  
27  
28  
29  
30  
31  
32  
33  
34  
35  
36  
37  
38  
39  
40  
41  
42  
43  
44  
45  
46  
47  
48  
49  
50  
51  
52  
53  
54  
55  
56  
57  
58  
59  
60

For peer review only

1  
2  
3  
4  
5  
6  
7  
8  
9  
10  
11  
12  
13  
14  
15  
16  
17  
18  
19  
20  
21  
22  
23  
24  
25  
26  
27  
28  
29  
30  
31  
32  
33  
34  
35  
36  
37  
38  
39  
40  
41  
42  
43  
44  
45  
46  
47  
48  
49  
50  
51  
52  
53  
54  
55  
56  
57  
58  
59  
60

658 **FIGURES**

659 **Figure 1. Study design diagram. (PDF format)**

660 Note: FP: Family Physician; IHO: Integrated Healthcare Organization; R: Randomization.

For peer review only

1  
2  
3 661 **SUPPLEMENTAL FILES**  
4

5 662 **Supplemental File 1 [DE-imFAR de-implementation strategies] (PDF format)**  
6

7  
8 663  
9  
10  
11  
12  
13  
14  
15  
16  
17  
18  
19  
20  
21  
22  
23  
24  
25  
26  
27  
28  
29  
30  
31  
32  
33  
34  
35  
36  
37  
38  
39  
40  
41  
42  
43  
44  
45  
46  
47  
48  
49  
50  
51  
52  
53  
54  
55  
56  
57  
58  
59  
60

For peer review only

# Experimental implementation trial with an additional control group

1  
2  
3  
4  
5  
6  
7  
8  
9  
10  
11  
12  
13  
14  
15  
16  
17  
18  
19  
20  
21  
22  
23  
24  
25  
26  
27  
28  
29  
30  
31  
32  
33  
34  
35  
36  
37  
38  
39  
40  
41

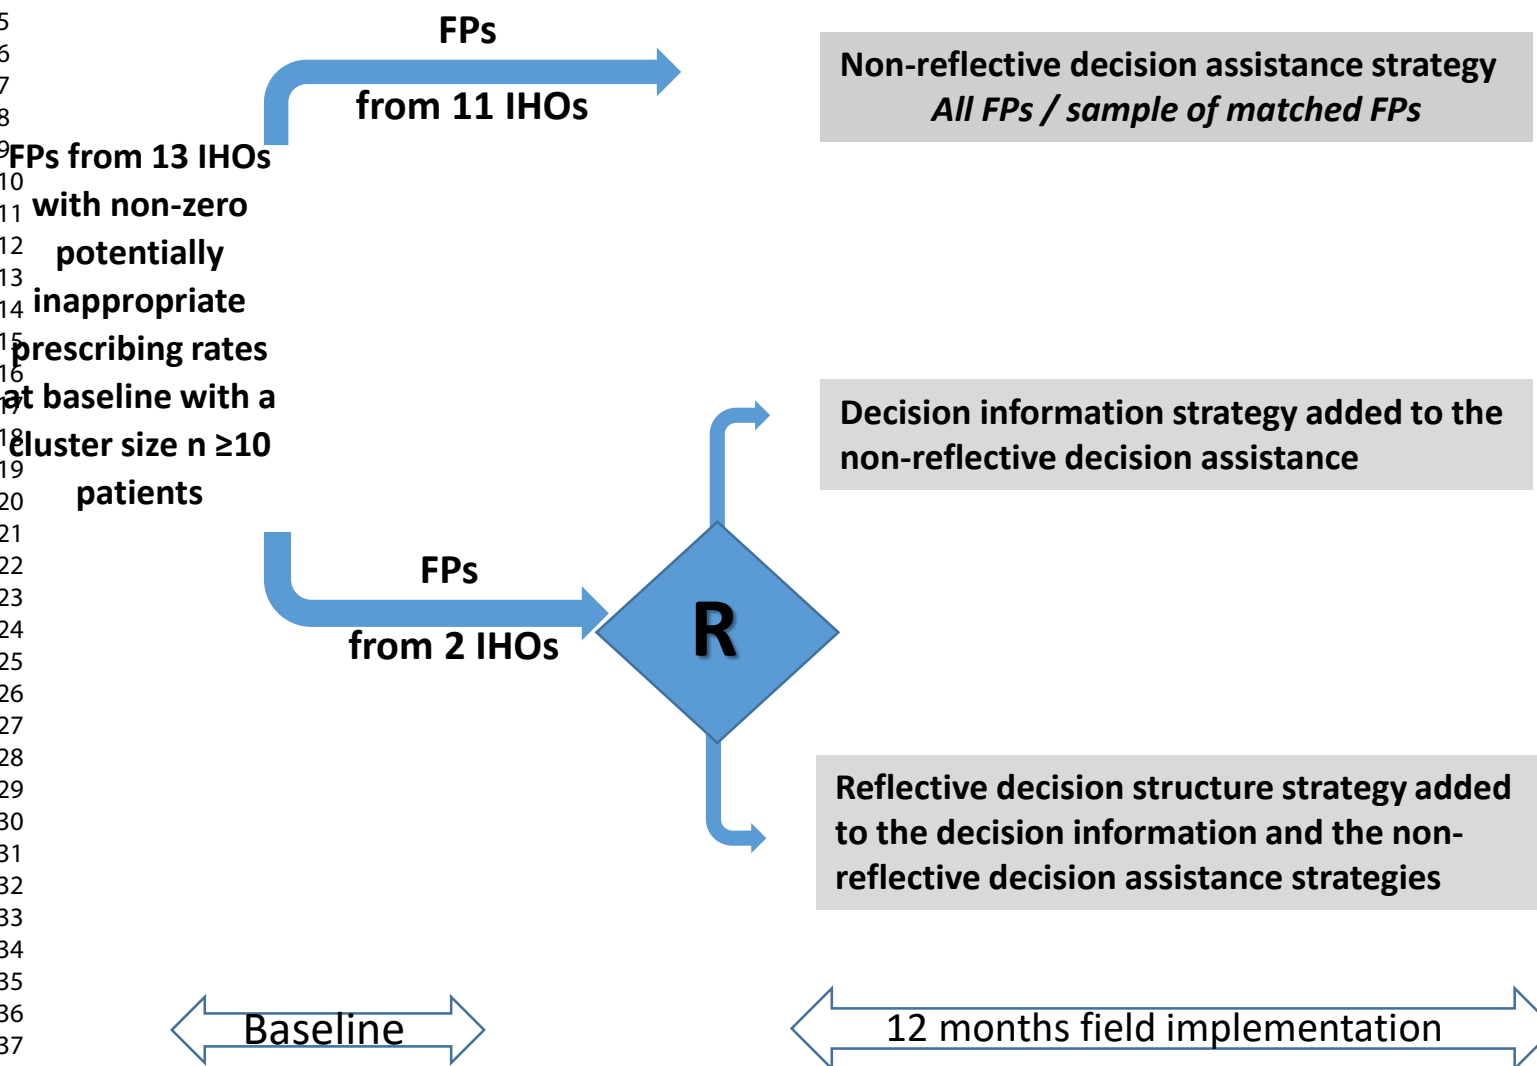

Change in the incidence of potentially inappropriate prescriptions and provision of lifestyle advice from baseline to 12 months after exposure of physicians to the compared strategies, in 40- to 74-year-old men and 45- to 74-year-old women with no history of statin use, with LDL-cholesterol levels between 70 and 189 mg/dl and/or Total Cholesterol between 200 and 289 mg/dl but without ischemic heart/cardiovascular disease and with an estimated cardiovascular risk <7.5% attending during the field-work period

**Outcome**

## The DE-imFAR de-implementation strategies

### 1. Strategy - Non-reflective decision assistance strategy

Support for clinical decision-making on the primary prevention of cardiovascular disease (CVD) in low cardiovascular risk (CVR) patients integrated into the electronic health record (EHR) of the Basque Health Service (Osakidetza), based on pop-up reminders and alerts, together with an interactive media-based algorithm stating the recommended practice and a patient information sheet.

#### 1.1. Target audience

This strategy targets all family physicians (FPs) from all 13 Integrated Healthcare Organizations (IHOs) of the Basque Health Service (Osakidetza), both in primary and specialist or hospital care.

#### 1.2. Active components (actions) of the intervention

- “Lighthouse” guiding alert in the REGICOR CVR calculator. Reminders of recommended clinical practice in the primary prevention of CVD that pop-up in the REGICOR CVR calculator when the CVR is estimated in patients aged between 35 and 74 years old. The alert varies depending on the CVR score (<10% or ≥10%).

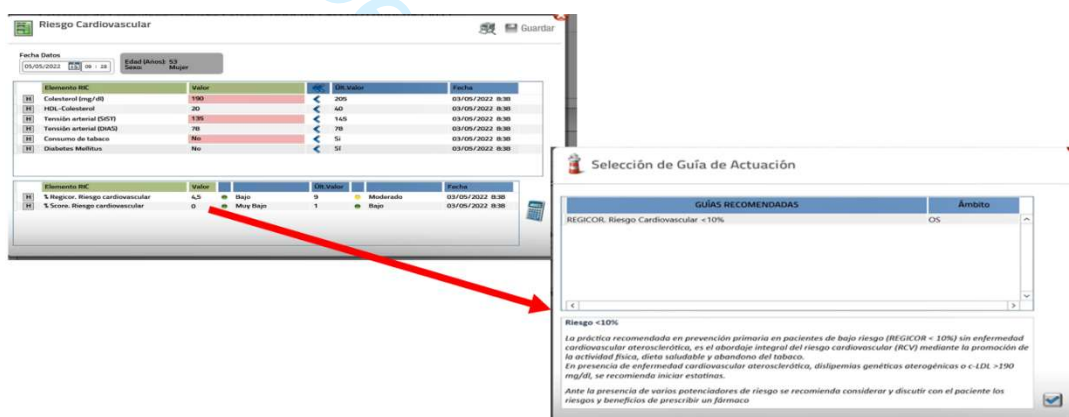

Figure 1. Pop-up reminder (“Lighthouse” guiding alert) in the REGICOR cardiovascular risk calculator when estimated cardiovascular risk score is <10%.

- Alerts in PRESBIDE. Pop-up reminders that appear when the PRESBIDE software is used to prescribe statins. There are three types of alerts depending on the patient’s age group (<35, 35-74, and ≥75 years old). Further, links are provided to a decision-making algorithm and a patient information sheet (i-botika).
- Decision-making algorithm: “Management of cholesterol as a risk factor in primary prevention of cardiovascular disease”. Clinical decision tree presenting potential courses of action based on clinical practice guidelines (CPGs), specifically for reducing cholesterol for the primary prevention of CVD in patients of different age groups and levels of CVR. Interactive decision-making support tool, developed by researchers collaborating in the DE-imFAR project, that also includes links for downloading two further documents: one providing information on CVD risk factors and the other on the 5As “Ask, Assess, Advise, Assist, Arrange” clinical intervention, recommended for promoting healthy lifestyles.

- Patient information sheet on cholesterol levels (i-botika: “Cholesterol levels are not the only thing”, developed in the framework of this project, providing information on high cholesterol levels and their role together with other risk factors associated with CVD)

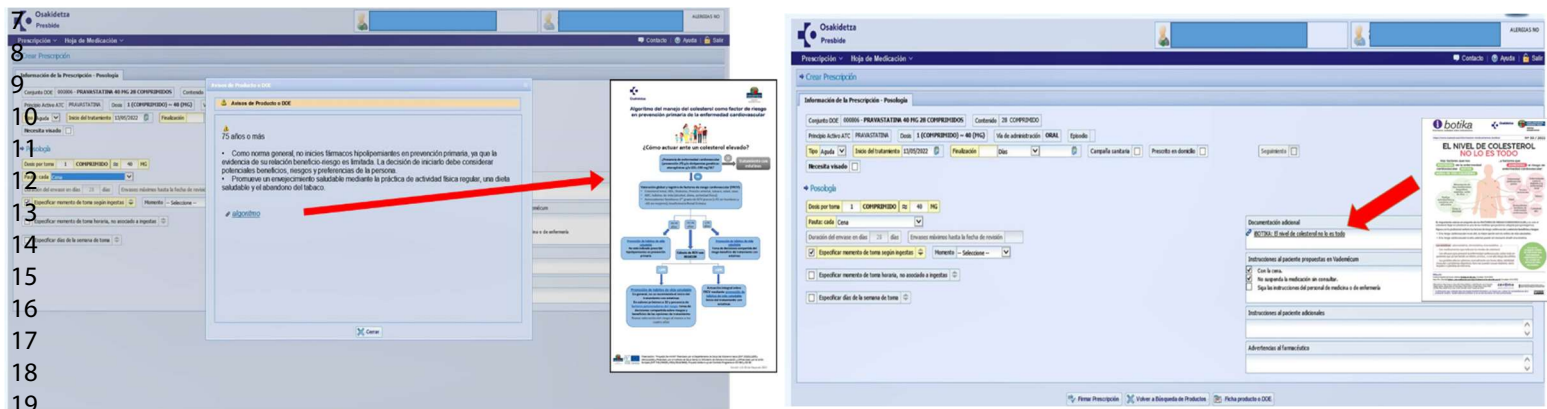

Figure 2. a). Pop-up reminder in the PRESBIDE software with recommendations on the prescribing of statins in people  $\geq 75$  years old that includes a link to the “Management of cholesterol as a risk factor in primary prevention of cardiovascular disease” algorithm, b) PRESBIDE form for prescribing statins, with a link to the patient information sheet (i-botika).

### 1.3. Objectives: *Determinant - What needs to change*

#### Pop-up alerts, reminders, and an algorithm

##### Cognitive and interpersonal skills:

- ✓ Enhance skills to enable appropriate prescribing of statins based on clinical practice recommendations

##### Attention, memory, and decision-making processes:

- ✓ Promote recall of recommended clinical practice in the primary prevention of CVD, reducing the impact of therapeutic inertia

##### Context and resources:

- ✓ Develop support systems in the EHR as reminders of and to promote the practices recommended in CPGs for the primary prevention of CVD (avoiding statins and encouraging healthy lifestyles)
- ✓ Restrict or impede inappropriate prescribing of statins due to clinical prescribing behavior driven by simplicity and speed

##### Emotion/Reinforcement:

- ✓ Reduce the likelihood of inappropriate prescribing due to habit, routine, or inertia (to “treat” cholesterol), through the experiencing of negative emotions when going against the recommended practice and this is made evident by alerts

#### Patient information sheet

##### Social influence (patient involvement):

- ✓ Increase patient awareness of the problems associated with the inappropriate prescribing of statins: risks vs benefits
- ✓ Increase patient knowledge of the criteria and courses of action recommended in CPGs (concerning cholesterol, CVD, and CVR)

### 1.4. Choice architecture techniques

#### A. Decision Information

**A1. Translate information:** change the format or presentation of information but not the content.

1  
2  
3 **Reframe:** present the (same) information in several ways, e.g., Presenting the contents of CPGs  
4 in several different ways (i.e., text within alerts, in the form of an algorithm, etc.).

5 **Simplify:** reduce the burden of cognitive effort necessary to process the information available  
6 and increase its usefulness in the decision-making process, e.g., algorithm.

7 **A2. Make information visible:** make necessary information readily accessible.

8 **Make external information visible:** make decision-relevant information visible, e.g., text within  
9 alerts recalling the CPGs.

## 10 11 **B. Decision structure**

### 12 **B1. Change choice defaults**

13 **Prompted choice:** avoid the status quo bias or default effects because of inertia or assumed  
14 recommendations, e.g., pop-up alerts.

15 **B2. Change option-related effort:** change physical effort.

16 **Increase physical effort:** e.g., pop-up alerts.

## 17 18 **C. Decision assistance**

19 **C1. Provide reminders:** provide positive reminders that heighten the salience of a desired option  
20 and/or diminish the salience of an undesired option, e.g., Pop-up alerts with the  
21 recommendation to not prescribe statins.

### 22 23 **1.5. Exposure**

- 24  
25  
26  
27  
28  
29  
30  
31  
32  
33  
34  
35  
36  
37  
38  
39  
40  
41  
42  
43  
44  
45  
46  
47  
48  
49  
50  
51  
52  
53  
54  
55  
56  
57  
58  
59  
60
- “Lighthouse” guiding alert in the REGICOR CVR calculator: by clicking to “save” the result after estimating CVR
  - Alerts in PRESBIDE: by starting to prescribe statins or clicking on the links to the algorithm or the patient information sheet



## 2. Strategy - Reflective/non-reflective decision information strategy

Corporate campaign entitled “Stopping low-value prescribing” (in Spanish: “*Abandono de prescripciones farmacológicas de escaso valor*”), promoted through a knowledge dissemination strategy based on circulars and notifications (e.g., mass mailing and internal newsletters) concerning content, informative material and documents on recommended clinical practice and improving the appropriateness and/or optimization in prescribing drug treatments, including that of statins for the primary prevention of CVD, made available to FPs on the corporate intranets of the Ezkerraldea-Enkarterri-Cruces (EEC) and Barakaldo-Sestao (BS) IHOs, part of the Basque Health Service (Osakidetza).

### 2.1. Target audience

This strategy targets all FPs from the EEC and BS IHOs, who will also be exposed to the first strategy, namely, non-reflective decision assistance.

### 2.2. Active components (actions) of the intervention

- Adherence to and implementation of best practice pages on the EEC and BS IHO intranets which have dedicated sections focused on improving the appropriateness of the use of statins providing easy access to the CPGs and recommended practice for the primary prevention of CVD.

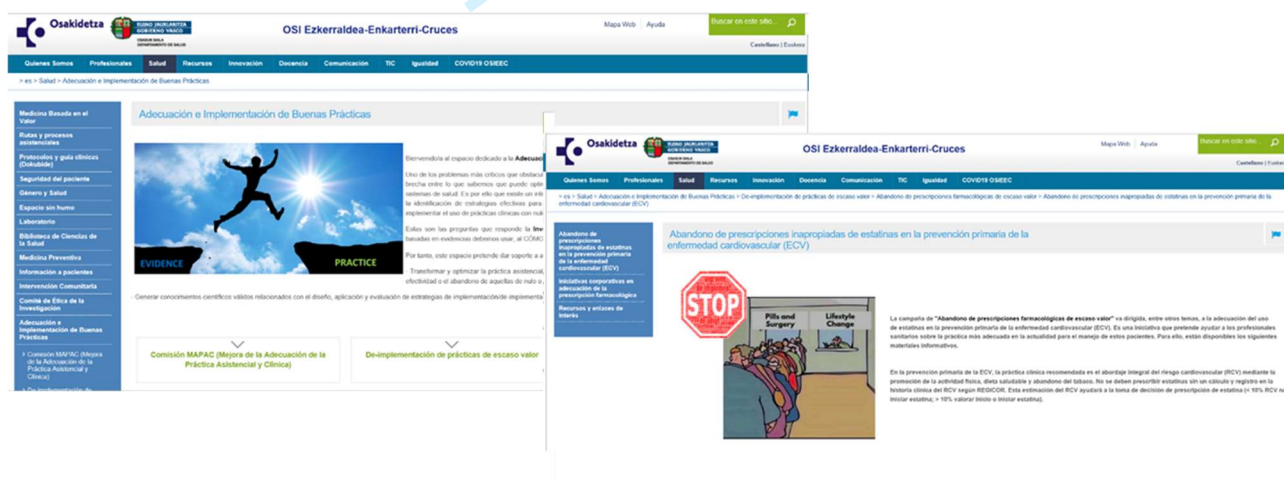

Figure 3. Main page of the adherence to and implementation of best practice (“*Adecuación e Implementación de Buenas Prácticas*”) section on the Ezkerraldea-Enkarterri-Cruces Integrated Healthcare Organization intranet and main page of the dedicated “Stopping inappropriate prescribing of statins for the primary prevention of cardiovascular disease” section. Equivalent pages were also created on the Barakaldo-Sestao Integrated Healthcare Organization intranet.

- Corporate dissemination campaign: activities aimed at attracting FPs to the pages created on the EEC and BS IHO intranets, in order that they access the information and documents available
  - News story on the launch of the campaign with links to the pages on the corporate intranets, e.g.,

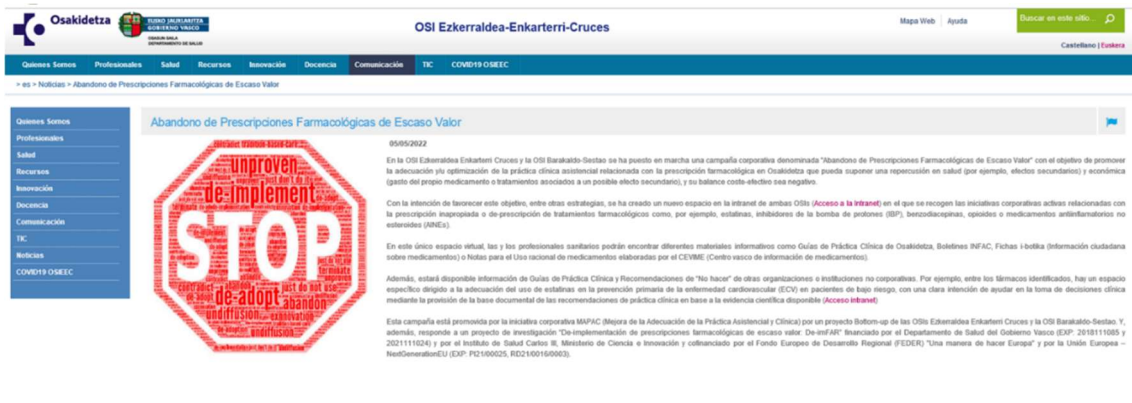

Figure 4. News story published on the Ezkerraldea-Enkarterri-Cruces Integrated Healthcare Organization intranet to announce the launch of the corporate “Stopping low-value prescribing” campaign and the development of pages on its intranet and that of the Barakaldo-Sestao Integrated Healthcare Organization, on May 5, 2022. The story was also published on the Barakaldo-Sestao Integrated Healthcare Organization intranet.

- **Monthly newsletter:** reporting of the launch of the campaign in the monthly newsletter circulated by the BS IHO to all its employees
- **Mass mailing** on the launch of the campaign with links to the pages on the corporate intranets
- **Revitalization of the corporate campaign:** periodic publication of news stories on the EEC and BS IHO intranets with content related to the campaign informing FPs of the updating of content/informative materials (for example, any changes in the recommendations in CPGs and INFAC [pharmacotherapy information] newsletters) on the dedicated pages on the intranets of both IHOs, aimed at improving the appropriateness of the use of statins in primary prevention of CVD, including links to these pages.
- **Justification email** from the Healthcare Management of the Basque Health Service, telling all FPs about the initiatives being put in place to improve the approach to the prevention of CVD, improving the appropriateness of statin prescribing, and encouraging the provision of healthy lifestyle advice, among other components.

### 2.3. Objectives: Determinant - *What needs to change*

#### Knowledge:

- ✓ Increase awareness of the problem of the inappropriate prescribing of statins
- ✓ Increase knowledge of the CPGs on the primary prevention of CVD, in particular, the appropriate or recommended care as a function of the estimated CVR
- ✓ Provide evidence-based standardized and up-to-date clinical guidelines

#### Behavior regulation:

- ✓ Encourage reflection on practice/performance in relation to inappropriate prescribing of statins in the primary prevention of CVD

#### Beliefs about capabilities:

- ✓ Strengthen the belief that the prescribing of statins is not as straightforward and safe as might be thought
- ✓ Strengthen the belief that statin treatment is not easy for patients (dosage)

#### Beliefs about consequences:

- ✓ Strengthen the belief that not prescribing statins for the primary prevention of CVD is not the same as “not treating”.
- ✓ Strengthen the belief that statins are not more effective in reducing cardiovascular events than healthy lifestyle promotion in the primary prevention of CVD
- ✓ Strengthen the belief that statins, in the primary prevention of CVD, may have adverse effects and are not risk-free.

Professional/social role and identity:

- ✓ Foster the belief that appropriate primary prevention of CVD is considered important at the organizational level and among peers.
- ✓ Strengthen understanding that the role of FPs goes beyond that of prescribing drugs.

Social influence:

- ✓ Increase awareness of the organizational goals for reducing inappropriate prescribing of statins in the primary prevention of CVD.
- ✓ Increase patient awareness of the problems associated with the inappropriate prescribing of statins: risks vs benefits
- ✓ Increase patient knowledge of the criteria and recommended courses of action (concerning cholesterol, CVD, and CVR)

Emotion/reinforcement:

- ✓ Reduce the likelihood of inappropriate prescribing due to habit, routine, or inertia (to “treat” cholesterol), through the experiencing of negative emotions when going against the recommended clinical practice and this is made evident by alerts.

Cognitive and interpersonal skills:

- ✓ Enhance skills to enable the appropriate prescribing of statins based on CPGs.

## 2.4. Choice architecture techniques

### A. Decision Information

**A1. Translate Information:** change the format or presentation of information but not the content.

**Reframe:** present the (same) information in several ways, e.g., clinical guidelines, algorithm, patient information leaflet.

**Simplify:** reduce the burden of cognitive effort necessary to process the information available and increase its usefulness in the decision-making process, e.g., algorithm.

**A2. Make information visible:** make necessary information readily accessible.

**Make external information visible:** make decision-relevant information visible, e.g., Links about inappropriate statin prescription in the Basque Health Service (Osakidetza), adverse effects of statins and cholesterol treatment, and promotion of the campaign through emails and news.

**A3. Provide social reference point:** influence decision-making through other’s behavior.

**Refer to descriptive norm:** depict the observable behavior of other people to impact on the decision-making process, e.g., links about inappropriate statin prescription in the Basque Health Service (Osakidetza).

### B. Decision structure

**B2. Change option-related effort:** modify the physical or financial effort involved in the decision-making process.

1  
2  
3 **Change physical effort**, e.g., decreasing physical effort by making all theme-related information  
4 accessible on the same website and including links to the website in the text of emails and news  
5 stories.  
6

### 7 **C. Decision assistance**

8  
9 **C1. Provide reminders:** provide positive reminders that heighten the salience of a desired option  
10 and/or diminish the salience of an undesired option, e.g., links to clinical guidelines with  
11 recommended practice about CVD primary prevention, and information about adverse effects  
12 of statins.  
13

14  
15 **C2. Provide social reference point:** influence decision-making through other's behavior.

16  
17 **Refer to opinion leader:** use them as information disseminators to improve the impact of the  
18 campaign, e.g., Setting of goals in an email sent by an opinion leader, using the source as much  
19 as the content of the message to improve the impact of the campaign.  
20  
21

### 22 23 **2.5. Exposure**

- 24  
25  
26  
27  
28  
29  
30  
31  
32  
33  
34  
35  
36  
37  
38  
39  
40  
41  
42  
43  
44  
45  
46  
47  
48  
49  
50  
51  
52  
53  
54  
55  
56  
57  
58  
59  
60
- By accessing the pages of the EEC and BS IHO corporate intranet and clicking on the links to the CPGs, INFAC newsletters, i-botika patient information sheets, recommendations, etc. available in the dedicated "Stopping inappropriate prescribing of statins for the primary prevention of cardiovascular disease" section
  - By accessing the news section on the dedicated pages on the intranets of EEC and BS IHOs

### 3. Strategy - Reflective decision structure strategy

Sending of regular personalized *Audit & Feedback (A&F)* reports with practice- and organizational-level performance indicators of the FPs regarding inappropriate prescribing of statins and healthy lifestyle promotion in the primary prevention of CVD in low-risk patients in the Basque Health Service

#### 3.1. Target audience

This strategy targets a randomly selected set of FPs from the EEC and BS IHOs, who will also be exposed to the previously described interventions, namely, *non-reflective decision assistance and decision information*.

#### 3.2. Active components (actions) of the intervention

- Informative email concerning the sending of A&F reports, including the possibility to opt out: email with information for primary care FPs of the EEC and BS IHOs on the sending of regular personalized A&F reports, in the framework of the corporate campaign, with the goal of encouraging adherence to recommendations and stopping inappropriate prescribing of statins
- A&F reports mailing: periodic A&F reports with indicators describing global performance across the Basque Health Service: a) rate of new potentially inappropriate prescribing of statins to people without CVD and with REGICOR CVR scores <7.5% and practice in the promotion of healthy habits in these patients; b) rate of documentation of CVR (in the 2 years before the prescription date) in all 40- to 75-year-olds with no clinical history of CVR who are newly prescribed statins. Future A&F reports are expected to contain a link to a short voluntary exercise on goal setting for improving the appropriateness of statin prescribing for the primary prevention of CVD

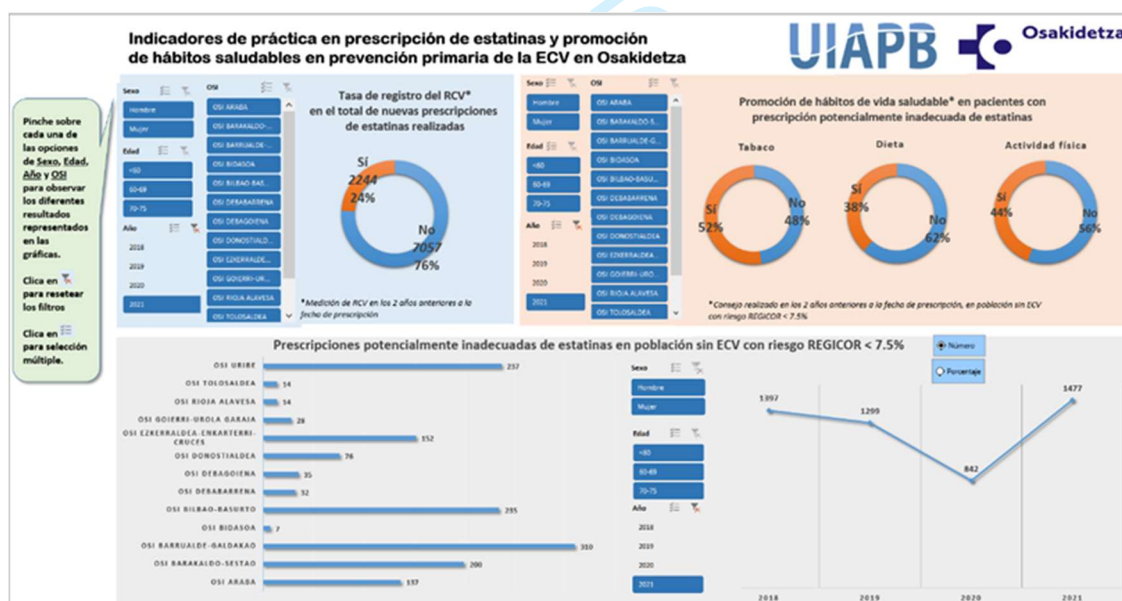

Figure 5. Draft of the Audit & Feedback report with practice- and organizational-level performance indicators of the family physicians regarding inappropriate prescribing of statins and healthy lifestyle promotion in the primary prevention of cardiovascular disease in low-risk patients in the Basque Health Service

### 3.3. Objectives: Determinant - What needs to change

#### Knowledge:

- ✓ Increase awareness of the problem of the inappropriate prescribing of statins

#### Behavior regulation:

- ✓ Make data available on inappropriate prescribing of statins for the primary prevention of CVD
- ✓ Provide tools for the setting of clear specific goals, at personal and organizational levels, regarding the reduction of inappropriate prescribing of statins for the primary prevention of CVD

#### Active reflection on personal practice:

- ✓ Encourage further reflection on practice/performance in relation to inappropriate prescribing of statins for the primary prevention of CVD

#### Intentions:

- ✓ Reduce the intention to prescribe statins inappropriately and increase the intention to promote healthy lifestyles for the primary prevention of CVD

#### Goals:

- ✓ Encourage commitment to practice in the primary prevention of CVD that is in accordance with recommendations
- ✓ Increase the motivation to promote healthy lifestyles in the primary prevention of CVD

#### Beliefs about capabilities:

- ✓ Strengthen self-efficacy and enhance the skills required for promoting healthy lifestyles

#### Emotion:

- ✓ Strengthen self-confidence about not prescribing statins for the primary prevention of CVD
- ✓ Foster belief in the safety of and trust in the courses of action recommended in the guidelines
- ✓ Experience a negative emotion after inappropriate prescribing

#### Professional/social role and identity:

- ✓ Foster the belief that appropriate primary prevention of CVD is considered important at the organizational level and among peers
- ✓ Strengthen understanding that the role of FPs goes beyond prescribing drugs

#### Reinforcement:

- ✓ Generate positive/negative reinforcement related to good/poor performance in the primary prevention of CVD.

### 3.4. Choice architecture techniques

#### A. Decision Information

**A1. Translate Information:** change the format or presentation of information but not the content.

**Simplify:** reduce the burden of cognitive effort necessary to process the information available and increase its usefulness in the decision-making process, e.g., presenting prescription rate data in a simple, user-friendly way, namely, on a dashboard.

**A2. Make information visible:** make necessary information readily accessible.

**Make own behavior visible:** feedback.

**Make external information visible:** make decision-relevant information visible, e.g., showing the prescription rates of other FPs and other IHOs.

**A3. Provide social reference point:** influence decision-making through the behavior of others.

**Refer to descriptive norm:** depict the observable behavior of other people to impact on the decision-making process, e.g., showing other FPs' prescribing behavior.

#### B. Decision structure

**B2. Change opinion-related effort:** modify the physical or financial effort involved in the decision-making process.

1  
2  
3 **Decrease physical effort:** collect all prescribing data in one file, e.g., dashboard.

4 **C. Decision assistance**

5 **C2. Facilitate commitment:** overcome constrained self-control and bridge the intention-  
6 behavior gap.

7 **Support self-commitment:** arrange with the aim of helping fulfill a plan, e.g., self-commitment  
8 questionnaire  
9

10  
11 **3.5. Exposure**

12 By opening the A&F reports received by email.  
13  
14  
15  
16  
17  
18  
19  
20  
21  
22  
23  
24  
25  
26  
27  
28  
29  
30  
31  
32  
33  
34  
35  
36  
37  
38  
39  
40  
41  
42  
43  
44  
45  
46  
47  
48  
49  
50  
51  
52  
53  
54  
55  
56  
57  
58  
59  
60

For peer review only

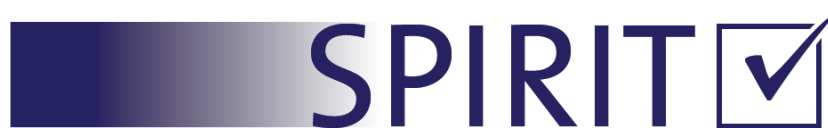

STANDARD PROTOCOL ITEMS: RECOMMENDATIONS FOR INTERVENTIONAL TRIALS

## SPIRIT 2013 Checklist: Recommended items to address in a clinical trial protocol and related documents\*

| Section/item                      | Item No | Description                                                                                                                                                                                                                                                                              | Addressed on page number |
|-----------------------------------|---------|------------------------------------------------------------------------------------------------------------------------------------------------------------------------------------------------------------------------------------------------------------------------------------------|--------------------------|
| <b>Administrative information</b> |         |                                                                                                                                                                                                                                                                                          |                          |
| Title                             | 1       | Descriptive title identifying the study design, population, interventions, and, if applicable, trial acronym                                                                                                                                                                             | 1                        |
| Trial registration                | 2a      | Trial identifier and registry name. If not yet registered, name of intended registry                                                                                                                                                                                                     | 4                        |
|                                   | 2b      | All items from the World Health Organization Trial Registration Data Set                                                                                                                                                                                                                 | N/A                      |
| Protocol version                  | 3       | Date and version identifier                                                                                                                                                                                                                                                              | 18                       |
| Funding                           | 4       | Sources and types of financial, material, and other support                                                                                                                                                                                                                              | 22                       |
| Roles and responsibilities        | 5a      | Names, affiliations, and roles of protocol contributors                                                                                                                                                                                                                                  | 1-2                      |
|                                   | 5b      | Name and contact information for the trial sponsor                                                                                                                                                                                                                                       | 2                        |
|                                   | 5c      | Role of study sponsor and funders, if any, in study design; collection, management, analysis, and interpretation of data; writing of the report; and the decision to submit the report for publication, including whether they will have ultimate authority over any of these activities | 22                       |
|                                   | 5d      | Composition, roles, and responsibilities of the coordinating centre, steering committee, endpoint adjudication committee, data management team, and other individuals or groups overseeing the trial, if applicable (see Item 21a for data monitoring committee)                         | N/A                      |
| <b>Introduction</b>               |         |                                                                                                                                                                                                                                                                                          |                          |
| Background and rationale          | 6a      | Description of research question and justification for undertaking the trial, including summary of relevant studies (published and unpublished) examining benefits and harms for each intervention                                                                                       | 5-7                      |
|                                   | 6b      | Explanation for choice of comparators                                                                                                                                                                                                                                                    | 6                        |
| Objectives                        | 7       | Specific objectives or hypotheses                                                                                                                                                                                                                                                        | 7-8                      |
| Trial design                      | 8       | Description of trial design including type of trial (eg, parallel group, crossover, factorial, single group), allocation ratio, and framework (eg, superiority, equivalence, noninferiority, exploratory)                                                                                | 9, 12                    |



## Methods: Participants, interventions, and outcomes

|                      |     |                                                                                                                                                                                                                                                                                                                                                                                |       |
|----------------------|-----|--------------------------------------------------------------------------------------------------------------------------------------------------------------------------------------------------------------------------------------------------------------------------------------------------------------------------------------------------------------------------------|-------|
| Study setting        | 9   | Description of study settings (eg, community clinic, academic hospital) and list of countries where data will be collected. Reference to where list of study sites can be obtained                                                                                                                                                                                             | 9     |
| Eligibility criteria | 10  | Inclusion and exclusion criteria for participants. If applicable, eligibility criteria for study centres and individuals who will perform the interventions (eg, surgeons, psychotherapists)                                                                                                                                                                                   | 10    |
| Interventions        | 11a | Interventions for each group with sufficient detail to allow replication, including how and when they will be administered                                                                                                                                                                                                                                                     | 11-12 |
|                      | 11b | Criteria for discontinuing or modifying allocated interventions for a given trial participant (eg, drug dose change in response to harms, participant request, or improving/worsening disease)                                                                                                                                                                                 | N/A   |
|                      | 11c | Strategies to improve adherence to intervention protocols, and any procedures for monitoring adherence (eg, drug tablet return, laboratory tests)                                                                                                                                                                                                                              | N/A   |
|                      | 11d | Relevant concomitant care and interventions that are permitted or prohibited during the trial                                                                                                                                                                                                                                                                                  | N/A   |
| Outcomes             | 12  | Primary, secondary, and other outcomes, including the specific measurement variable (eg, systolic blood pressure), analysis metric (eg, change from baseline, final value, time to event), method of aggregation (eg, median, proportion), and time point for each outcome. Explanation of the clinical relevance of chosen efficacy and harm outcomes is strongly recommended | 13-14 |
| Participant timeline | 13  | Time schedule of enrolment, interventions (including any run-ins and washouts), assessments, and visits for participants. A schematic diagram is highly recommended (see Figure)                                                                                                                                                                                               | N/A   |
| Sample size          | 14  | Estimated number of participants needed to achieve study objectives and how it was determined, including clinical and statistical assumptions supporting any sample size calculations                                                                                                                                                                                          | 16    |
| Recruitment          | 15  | Strategies for achieving adequate participant enrolment to reach target sample size                                                                                                                                                                                                                                                                                            | N/A   |

## Methods: Assignment of interventions (for controlled trials)

### Allocation:

|                     |     |                                                                                                                                                                                                                                                                                                                                                          |    |
|---------------------|-----|----------------------------------------------------------------------------------------------------------------------------------------------------------------------------------------------------------------------------------------------------------------------------------------------------------------------------------------------------------|----|
| Sequence generation | 16a | Method of generating the allocation sequence (eg, computer-generated random numbers), and list of any factors for stratification. To reduce predictability of a random sequence, details of any planned restriction (eg, blocking) should be provided in a separate document that is unavailable to those who enrol participants or assign interventions | 12 |
|---------------------|-----|----------------------------------------------------------------------------------------------------------------------------------------------------------------------------------------------------------------------------------------------------------------------------------------------------------------------------------------------------------|----|

|    |              |     |                                                                       |     |
|----|--------------|-----|-----------------------------------------------------------------------|-----|
| 1  | Allocation   |     | Mechanism of implementing the allocation sequence (eg, central        |     |
| 2  | concealment  | 16b | telephone; sequentially numbered, opaque, sealed envelopes),          | 12  |
| 3  | mechanism    |     | describing any steps to conceal the sequence until interventions are  |     |
| 4  |              |     | assigned                                                              |     |
| 5  |              |     |                                                                       |     |
| 6  | Implementati | 16c | Who will generate the allocation sequence, who will enrol             | 12  |
| 7  | on           |     | participants, and who will assign participants to interventions       |     |
| 8  |              |     |                                                                       |     |
| 9  | Blinding     |     | Who will be blinded after assignment to interventions (eg, trial      |     |
| 10 | (masking)    | 17a | participants, care providers, outcome assessors, data analysts), and  | 12  |
| 11 |              |     | how                                                                   |     |
| 12 |              |     |                                                                       |     |
| 13 |              |     |                                                                       |     |
| 14 |              | 17b | If blinded, circumstances under which unblinding is permissible, and  |     |
| 15 |              |     | procedure for revealing a participant's allocated intervention during | N/A |
| 16 |              |     | the trial                                                             |     |
| 17 |              |     |                                                                       |     |
| 18 |              |     |                                                                       |     |

### 19 **Methods: Data collection, management, and analysis**

|    |                 |     |                                                                          |       |
|----|-----------------|-----|--------------------------------------------------------------------------|-------|
| 21 | Data collection |     | Plans for assessment and collection of outcome, baseline, and            |       |
| 22 | methods         | 18a | other trial data, including any related processes to promote data        | 16-17 |
| 23 |                 |     | quality (eg, duplicate measurements, training of assessors) and a        |       |
| 24 |                 |     | description of study instruments (eg, questionnaires, laboratory         |       |
| 25 |                 |     | tests) along with their reliability and validity, if known. Reference to |       |
| 26 |                 |     | where data collection forms can be found, if not in the protocol         |       |
| 27 |                 |     |                                                                          |       |
| 28 |                 |     |                                                                          |       |
| 29 |                 | 18b | Plans to promote participant retention and complete follow-up,           | N/A   |
| 30 |                 |     | including list of any outcome data to be collected for participants      |       |
| 31 |                 |     | who discontinue or deviate from intervention protocols                   |       |
| 32 |                 |     |                                                                          |       |
| 33 | Data            |     | Plans for data entry, coding, security, and storage, including any       |       |
| 34 | management      | 19  | related processes to promote data quality (eg, double data entry;        | 17    |
| 35 |                 |     | range checks for data values). Reference to where details of data        |       |
| 36 |                 |     | management procedures can be found, if not in the protocol               |       |
| 37 |                 |     |                                                                          |       |
| 38 |                 |     |                                                                          |       |
| 39 | Statistical     |     | Statistical methods for analysing primary and secondary outcomes.        |       |
| 40 | methods         | 20a | Reference to where other details of the statistical analysis plan can    | 15-16 |
| 41 |                 |     | be found, if not in the protocol                                         |       |
| 42 |                 |     |                                                                          |       |
| 43 |                 | 20b | Methods for any additional analyses (eg, subgroup and adjusted           | 15    |
| 44 |                 |     | analyses)                                                                |       |
| 45 |                 |     |                                                                          |       |
| 46 |                 |     |                                                                          |       |
| 47 |                 | 20c | Definition of analysis population relating to protocol non-adherence     |       |
| 48 |                 |     | (eg, as randomised analysis), and any statistical methods to handle      | N/A   |
| 49 |                 |     | missing data (eg, multiple imputation)                                   |       |
| 50 |                 |     |                                                                          |       |
| 51 |                 |     |                                                                          |       |

### 52 **Methods: Monitoring**

|    |                 |     |                                                                         |     |
|----|-----------------|-----|-------------------------------------------------------------------------|-----|
| 54 | Data monitoring |     | Composition of data monitoring committee (DMC); summary of its          |     |
| 55 |                 | 21a | role and reporting structure; statement of whether it is independent    | N/A |
| 56 |                 |     | from the sponsor and competing interests; and reference to where        |     |
| 57 |                 |     | further details about its charter can be found, if not in the protocol. |     |
| 58 |                 |     | Alternatively, an explanation of why a DMC is not needed                |     |
| 59 |                 |     |                                                                         |     |
| 60 |                 |     |                                                                         |     |

|    |                                 |                                                                          |       |
|----|---------------------------------|--------------------------------------------------------------------------|-------|
| 1  |                                 | Description of any interim analyses and stopping guidelines,             |       |
| 2  | 21b                             | including who will have access to these interim results and make         | N/A   |
| 3  |                                 | the final decision to terminate the trial                                |       |
| 4  |                                 |                                                                          |       |
| 5  | Harms                           | Plans for collecting, assessing, reporting, and managing solicited       |       |
| 6  |                                 | and spontaneously reported adverse events and other unintended           | N/A   |
| 7  | 22                              | effects of trial interventions or trial conduct                          |       |
| 8  |                                 |                                                                          |       |
| 9  | Auditing                        | Frequency and procedures for auditing trial conduct, if any, and         |       |
| 10 |                                 | whether the process will be independent from investigators and the       | N/A   |
| 11 | 23                              | sponsor                                                                  |       |
| 12 |                                 |                                                                          |       |
| 13 |                                 |                                                                          |       |
| 14 |                                 |                                                                          |       |
| 15 | <b>Ethics and dissemination</b> |                                                                          |       |
| 16 | Research ethics                 | Plans for seeking research ethics committee/institutional review         |       |
| 17 | approval                        | board (REC/IRB) approval                                                 | 18    |
| 18 |                                 |                                                                          |       |
| 19 | Protocol                        | Plans for communicating important protocol modifications (eg,            |       |
| 20 | amendments                      | changes to eligibility criteria, outcomes, analyses) to relevant parties |       |
| 21 |                                 | (eg, investigators, REC/IRBs, trial participants, trial registries,      | N/A   |
| 22 | 25                              | journals, regulators)                                                    |       |
| 23 |                                 |                                                                          |       |
| 24 |                                 |                                                                          |       |
| 25 | Consent or                      | Who will obtain informed consent or assent from potential trial          |       |
| 26 | assent                          | participants or authorised surrogates, and how (see Item 32)             | 12,17 |
| 27 |                                 |                                                                          |       |
| 28 |                                 |                                                                          |       |
| 29 | 26b                             | Additional consent provisions for collection and use of participant      | N/A   |
| 30 |                                 | data and biological specimens in ancillary studies, if applicable        |       |
| 31 |                                 |                                                                          |       |
| 32 | Confidentiality                 | How personal information about potential and enrolled participants       |       |
| 33 |                                 | will be collected, shared, and maintained in order to protect            | 16-17 |
| 34 | 27                              | confidentiality before, during, and after the trial                      |       |
| 35 |                                 |                                                                          |       |
| 36 | Declaration of                  | Financial and other competing interests for principal investigators      |       |
| 37 | interests                       | for the overall trial and each study site                                | 22    |
| 38 |                                 |                                                                          |       |
| 39 | Access to data                  | Statement of who will have access to the final trial dataset, and        |       |
| 40 |                                 | disclosure of contractual agreements that limit such access for          | 18    |
| 41 | 29                              | investigators                                                            |       |
| 42 |                                 |                                                                          |       |
| 43 |                                 |                                                                          |       |
| 44 | Ancillary and                   | Provisions, if any, for ancillary and post-trial care, and for           |       |
| 45 | post-trial care                 | compensation to those who suffer harm from trial participation           | N/A   |
| 46 |                                 |                                                                          |       |
| 47 | Dissemination                   | Plans for investigators and sponsor to communicate trial results to      |       |
| 48 | policy                          | participants, healthcare professionals, the public, and other relevant   |       |
| 49 | 31a                             | groups (eg, via publication, reporting in results databases, or other    | 18    |
| 50 |                                 | data sharing arrangements), including any publication restrictions       |       |
| 51 |                                 |                                                                          |       |
| 52 |                                 |                                                                          |       |
| 53 | 31b                             | Authorship eligibility guidelines and any intended use of                | N/A   |
| 54 |                                 | professional writers                                                     |       |
| 55 |                                 |                                                                          |       |
| 56 | 31c                             | Plans, if any, for granting public access to the full protocol,          | 18    |
| 57 |                                 | participant-level dataset, and statistical code                          |       |
| 58 |                                 |                                                                          |       |
| 59 |                                 |                                                                          |       |
| 60 | <b>Appendices</b>               |                                                                          |       |

|   |            |    |                                                                        |     |
|---|------------|----|------------------------------------------------------------------------|-----|
| 1 | Informed   |    | Model consent form and other related documentation given to            |     |
| 2 | consent    | 32 | participants and authorised surrogates                                 | N/A |
| 3 | materials  |    |                                                                        |     |
| 4 |            |    |                                                                        |     |
| 5 | Biological |    | Plans for collection, laboratory evaluation, and storage of biological |     |
| 6 | specimens  | 33 | specimens for genetic or molecular analysis in the current trial and   | N/A |
| 7 |            |    | for future use in ancillary studies, if applicable                     |     |
| 8 |            |    |                                                                        |     |

\*It is strongly recommended that this checklist be read in conjunction with the SPIRIT 2013 Explanation & Elaboration for important clarification on the items. Amendments to the protocol should be tracked and dated. The SPIRIT checklist is copyrighted by the SPIRIT Group under the Creative Commons "[Attribution-NonCommercial-NoDerivs 3.0 Unported](#)" license.

Reference: Chan A-W, Tetzlaff JM, Altman DG, et al. SPIRIT 2013 Statement: Defining standard protocol items for clinical trials. *Ann Intern Med.* 2013 Feb 5;158(3):200-207. doi: 10.7326/0003-4819-158-3-201302050-00583.

# BMJ Open

**The De-imFAR Phase II Project: A study protocol for a cluster randomized implementation trial to evaluate the effectiveness of de-implementation strategies to reduce low-value statin prescribing in the primary prevention of Cardiovascular Disease.**

|                               |                                                                                                                                                                                                                                                                                                                                                                                                                                                                                                                                                                                                                                                                                                                                                                                                                                                                                                                                                                                                                                                                                                                                                                                                                                                                                                                                                                                                                                                                                                                                                                                                                                                                                                                                                                                                                                                                                                                                                                                                                                                                                                                                                                                                                                                                                                                                                                                                              |
|-------------------------------|--------------------------------------------------------------------------------------------------------------------------------------------------------------------------------------------------------------------------------------------------------------------------------------------------------------------------------------------------------------------------------------------------------------------------------------------------------------------------------------------------------------------------------------------------------------------------------------------------------------------------------------------------------------------------------------------------------------------------------------------------------------------------------------------------------------------------------------------------------------------------------------------------------------------------------------------------------------------------------------------------------------------------------------------------------------------------------------------------------------------------------------------------------------------------------------------------------------------------------------------------------------------------------------------------------------------------------------------------------------------------------------------------------------------------------------------------------------------------------------------------------------------------------------------------------------------------------------------------------------------------------------------------------------------------------------------------------------------------------------------------------------------------------------------------------------------------------------------------------------------------------------------------------------------------------------------------------------------------------------------------------------------------------------------------------------------------------------------------------------------------------------------------------------------------------------------------------------------------------------------------------------------------------------------------------------------------------------------------------------------------------------------------------------|
| Journal:                      | <i>BMJ Open</i>                                                                                                                                                                                                                                                                                                                                                                                                                                                                                                                                                                                                                                                                                                                                                                                                                                                                                                                                                                                                                                                                                                                                                                                                                                                                                                                                                                                                                                                                                                                                                                                                                                                                                                                                                                                                                                                                                                                                                                                                                                                                                                                                                                                                                                                                                                                                                                                              |
| Manuscript ID                 | bmjopen-2023-078692.R1                                                                                                                                                                                                                                                                                                                                                                                                                                                                                                                                                                                                                                                                                                                                                                                                                                                                                                                                                                                                                                                                                                                                                                                                                                                                                                                                                                                                                                                                                                                                                                                                                                                                                                                                                                                                                                                                                                                                                                                                                                                                                                                                                                                                                                                                                                                                                                                       |
| Article Type:                 | Protocol                                                                                                                                                                                                                                                                                                                                                                                                                                                                                                                                                                                                                                                                                                                                                                                                                                                                                                                                                                                                                                                                                                                                                                                                                                                                                                                                                                                                                                                                                                                                                                                                                                                                                                                                                                                                                                                                                                                                                                                                                                                                                                                                                                                                                                                                                                                                                                                                     |
| Date Submitted by the Author: | 02-Feb-2024                                                                                                                                                                                                                                                                                                                                                                                                                                                                                                                                                                                                                                                                                                                                                                                                                                                                                                                                                                                                                                                                                                                                                                                                                                                                                                                                                                                                                                                                                                                                                                                                                                                                                                                                                                                                                                                                                                                                                                                                                                                                                                                                                                                                                                                                                                                                                                                                  |
| Complete List of Authors:     | <p>Sanchez , Alvaro; Osakidetza-Basque Health Service, Primary Care Research Unit of Bizkaia, Deputy Directorate of Healthcare Assistance; Biocruces Bizkaia Health Research Institute</p> <p>Pi Joan, Jose Ignacio; Osakidetza-Basque Health Service, Clinical Epidemiology Unit; Biocruces Bizkaia Health Research Institute</p> <p>Sainz de Rozas, Rita; Osakidetza-Basque Health Service, Primary Care Pharmacy Unit, Ezkerraldea-Enkarterri-Cruces Integrated Health Organization; Biocruces Bizkaia Health Research Institute</p> <p>Lekue, Itxasne; Osakidetza-Basque Health Service, Primary Care Pharmacy Unit, Ezkerraldea-Enkarterri-Cruces Integrated Health Organization; Biocruces Bizkaia Health Research Institute</p> <p>San Vicente, Ricardo; Osakidetza-Basque Health Service, Zumarraga Health Center, Goierri-Alto Urola Integrated Health Organization</p> <p>Quindimil, Jose Antonio; Osakidetza-Basque Health Service, Sestao Health Center, Barakaldo-Sestao Integrated Health Organization</p> <p>Rotaeche, Rafael; Osakidetza-Basque Health Service, Primary Care Research Unit of Gipuzkoa, Organization of Integrated Health Services of Gipuzkoa</p> <p>Etxeberria, Arritxu ; Osakidetza-Basque Health Service, Primary Care Pharmacy, Donostialdea Integrated Health Organization</p> <p>Mozo, Carmela; Osakidetza-Basque Health Service, Primary Care Pharmacy, Donostialdea Integrated Health Organization</p> <p>Martinez-Cengotitabengoa, Monica; University of the Basque Country, School of Pharmacy; Osakidetza-Basque Health Service</p> <p>Monge, Monica; Osakidetza-Basque Health Service, Corporate Pharmacy Service, Directorate of Healthcare Assistance</p> <p>Gómez-Ramírez, Cristina; Osakidetza-Basque Health Service, Cardiology Department, Cruces University Hospital, Ezkerraldea-Enkarterri-Cruces Integrated Health Organization</p> <p>Samper, Ricardo; Osakidetza-Basque Health Service, Corporate Pharmacy Service, Directorate of Healthcare Assistance</p> <p>Ogueta Lana, Mikel ; Osakidetza-Basque Health Service, Subdirectorate of Quality and Health Information Systems</p> <p>Celorrio, Sara; Osakidetza-Basque Health Service, Barakaldo-Sestao Integrated Health Organization</p> <p>Merino-Inda, Nerea; Biocruces Bizkaia Health Research Institute</p> <p>Llarena, Marta; Biocruces Bizkaia Health Research Institute, Network for</p> |

|                                 |                                                                                                                                                                                                                                                                                                                                                                                                                                                                                                                                                                                                                                        |
|---------------------------------|----------------------------------------------------------------------------------------------------------------------------------------------------------------------------------------------------------------------------------------------------------------------------------------------------------------------------------------------------------------------------------------------------------------------------------------------------------------------------------------------------------------------------------------------------------------------------------------------------------------------------------------|
|                                 | <p>Research on Chronicity, Primary Care, and Health Promotion (RICAPPS) Gonzalez Saenz de Tejada, Marta; Biocruces Bizkaia Health Research Institute, Network for Research on Chronicity, Primary Care, and Health Promotion (RICAPPS)</p> <p>García-Alvarez, Arturo; Osakidetza-Basque Health Service, Primary Care Research Unit of Bizkaia. Deputy Directorate of Healthcare Assistance; Biocruces Bizkaia Health Research Institute</p> <p>Grandes, Gonzalo; Osakidetza-Basque Health Service, Primary Care Research Unit of Bizkaia. Deputy Directorate of Healthcare Assistance; Biocruces Bizkaia Health Research Institute</p> |
| <b>Primary Subject Heading</b>: | Evidence based practice                                                                                                                                                                                                                                                                                                                                                                                                                                                                                                                                                                                                                |
| Secondary Subject Heading:      | General practice / Family practice, Health services research, Cardiovascular medicine, Research methods                                                                                                                                                                                                                                                                                                                                                                                                                                                                                                                                |
| Keywords:                       | Primary Care < Primary Health Care, Clinical Decision-Making, Clinical Trial, PREVENTIVE MEDICINE, Implementation Science, Cardiovascular Disease                                                                                                                                                                                                                                                                                                                                                                                                                                                                                      |
|                                 |                                                                                                                                                                                                                                                                                                                                                                                                                                                                                                                                                                                                                                        |

SCHOLARONE™  
Manuscripts

# TITLE PAGE

## Title

**The De-imFAR Phase II Project: A study protocol for a cluster randomized implementation trial to evaluate the effectiveness of de-implementation strategies to reduce low-value statin prescribing in the primary prevention of Cardiovascular Disease.**

**Author's details** Alvaro Sanchez<sup>1\*</sup>, Jose I. Pijoan<sup>2</sup>, Rita Sainz de Rozas<sup>3</sup>, Itxasne Lekue<sup>3</sup>, Ricardo San Vicente<sup>4</sup>, Jose Antonio Quindimil<sup>5</sup>, Rafael Rotaecche<sup>6</sup>, Arritxu Etxeberria<sup>7</sup>, Carmela Mozo<sup>7</sup>, Monica Martinez-Cengotitabengoa<sup>8</sup>, Monica Monge<sup>9</sup>, Cristina Gómez-Ramírez<sup>10</sup>, Ricardo Samper<sup>11</sup>, Mikel Ogueta Lana<sup>12</sup>, Sara Celorrio<sup>13</sup>, Nerea Merino-Inda<sup>14</sup>, Marta Llarena<sup>15</sup>, Marta Gonzalez Saenz de Tejada<sup>15</sup>, Arturo Garcia-Alvarez<sup>1</sup>, and Gonzalo Grandes<sup>1</sup>

<sup>1</sup> Primary Care Research Unit of Bizkaia, Deputy Directorate of Healthcare Assistance, Biobizkaia Health Research Institute, Basque Health Service - Osakidetza, Network for Research on Chronicity, Primary Care, and Health Promotion (RICAPPS), Barakaldo, Bizkaia, Spain.

<sup>2</sup> Clinical Epidemiology Unit, Biobizkaia Health Research Institute, Basque Health Service - Osakidetza, Barakaldo, Bizkaia, Spain. CIBER de Epidemiología y Salud Pública (CIBERESP), Instituto de Salud Carlos III, Spain.

<sup>3</sup> Primary Care Pharmacy Unit, Ezkerraldea-Enkarterri-Cruces Integrated Health Organization, Basque Health Service – Osakidetza, Biobizkaia Health Research Institute, Barakaldo, Bizkaia, Spain.

<sup>4</sup> Zumarraga Health Center, Goierri-Alto Urola Integrated Health Organization, Basque Health Service – Osakidetza, Zumárraga, Gipuzkoa, Spain.

<sup>5</sup> Sestao Health Center, Barakaldo-Sestao Integrated Health Organization, Basque Health Service – Osakidetza, Sestao, Bizkaia, Spain.

1  
2  
3 29 <sup>6</sup> Primary Care Research Unit of Gipuzkoa, Organization of Integrated Health Services  
4  
5 30 of Gipuzkoa, Biogipuzkoa Health Reseach Institute, Donostia-San Sebastian, Gipuzkoa,  
6  
7 31 Spain

8  
9 32 <sup>7</sup> Primary Care Pharmacy, Donostialdea Integrated Health Organization, Hernani,  
10  
11 33 Gipuzkoa, Spain

12  
13 34 <sup>8</sup> School of Pharmacy, University of the Basque Country UPV/EHU, Vitoria-Gasteiz,  
14  
15 35 Spain. Psychology Clinic of East Anglia, Norwich, UK. Osakidetza Basque Health  
16  
17 36 Service, Barakaldo, Spain.

18  
19  
20 37 <sup>9</sup> Corporate Pharmacy Service, Directorate of Healthcare Assistance, Osakidetza-  
21  
22 38 Basque Health Service Central Services, Vitoria-Gasteiz, Spain

23  
24 39 <sup>10</sup> Cardiology Department, Cruces University Hospital, Ezkerraldea-Enkarterri-Cruces  
25  
26 40 Integrated Health Organization, Basque Health Service – Osakidetza, Barakaldo,  
27  
28 41 Bizkaia, Spain.

29  
30 42 <sup>11</sup> Corporate Pharmacy Service, Directorate of Healthcare Assistance, Osakidetza-  
31  
32 43 Basque Health Service Central Services, Vitoria-Gasteiz, Spain

33  
34 44 <sup>12</sup> Subdirectorate of Quality and Health Information Systems, Osakidetza-Basque Health  
35  
36 45 Service Central Services, Vitoria-Gasteiz, Spain

37  
38  
39 46 <sup>13</sup> Barakaldo-Sestao Integrated Health Organization, Basque Health Service –  
40  
41 47 Osakidetza, Barakaldo, Spain

42  
43 48 <sup>14</sup> Biobizkaia Health Research Institute, Barakaldo, Bizkaia, Spain.

44  
45 49 <sup>15</sup> Biobizkaia Health Research Institute, Network for Research on Chronicity, Primary  
46  
47 50 Care, and Health Promotion (RICAPPS), Barakaldo, Bizkaia, Spain.

48  
49 51

50  
51 52 **\* Corresponding author:**

52  
53 53 Alvaro Sánchez

54  
55 54 E-mail: [Alvaro.sanchezperez@osakidetza.eus](mailto:Alvaro.sanchezperez@osakidetza.eus)

56  
57 55 Primary Care Research Unit of Bizkaia, Deputy Directorate of Healthcare Assistance,  
58  
59 56 Biobizkaia Health Research Institute, Basque Health Service – Osakidetza, Network for



1  
2  
3 57 Research on Chronicity, Primary Care, and Health Promotion (RICAPPS). Plaza Cruces  
4  
5 58 s/n, E-48903 Barakaldo, Bizkaia, Spain.  
6  
7 59

## 60 **ABSTRACT**

### 61 **Introduction**

62 This study aims to reduce potentially inappropriate prescribing (PIP) of statins and foster  
63 healthy lifestyle promotion in cardiovascular disease (CVD) primary prevention in low-  
64 risk patients. To this end, we will compare the effectiveness and feasibility of several de-  
65 implementation strategies developed following the structured design process of the  
66 Behavior Change Wheel targeting key determinants of clinical decision-making process  
67 in CVD prevention.

### 68 **Methods and analysis**

69 A cluster randomized implementation trial, with an additional control group, will be  
70 launched, involving family physicians (FPs) from 13 Integrated Healthcare Organizations  
71 (IHOs) of Osakidetza-Basque Health Service with non-zero incidence rates of PIP of  
72 statins in 2021. All FPs will be exposed to a non-reflective decision assistance strategy  
73 based on reminders and decision support tools. Additionally, FPs from two of the IHOs  
74 will be randomly assigned to one of two increasingly intensive de-implementation  
75 strategies: adding a decision information strategy based on knowledge dissemination,  
76 and a reflective decision structure strategy through audit/feedback. The target population  
77 comprises 45- to 74-year-old women and 40- to 74-year-old men with moderately  
78 elevated cholesterol levels but no diagnosed CVD and low cardiovascular risk  
79 (REGICOR <7.5%), who attend at least one appointment with any of the participating  
80 FPs (May 2022-May 2023), and will be followed until May 2024. We use the Reach,  
81 Effectiveness, Adoption, Implementation and Maintenance (RE-AIM) framework to  
82 evaluate outcomes. The main outcome will be the change in the incidence rate of PIP of  
83 statins and healthy lifestyle counseling in the study population 12 and 24 months after  
84 FPs' exposure to the strategies. Moreover, FPs' perception of their feasibility and

1  
2  
3 85 acceptability, and patient experience regarding quality of treatment received will be  
4  
5 86 evaluated.

6  
7 87 **Ethics and dissemination**

8  
9 88 The study was approved by the Basque Country Clinical Research Ethics Committee  
10  
11 89 and was registered in ClinicalTrials.gov (NCT04022850). Results will be disseminated in  
12  
13 90 scientific peer-reviewed journals.

14  
15  
16 91 **Keywords:** Inappropriate Prescribing, Cardiovascular Diseases / prevention & control,  
17  
18 92 Hypercholesterolemia / drug therapy, Implementation Science, Research Design,  
19  
20 93 Primary care.

21  
22 94

23  
24  
25 95 **STRENGTHS AND LIMITATIONS OF THIS STUDY**

- 26  
27 96 • An strength of the DE-imFAR study is that it involves an efficient design that  
28  
29 97 combines experimental and non-experimental comparisons through two randomly  
30  
31 98 assigned intervention arms and one non-randomized control arm to test the  
32  
33 99 comparative effectiveness on reducing potentially inappropriate prescribing (PIP)  
34  
35 100 of statins and increasing healthy lifestyle promotion of several de-implementation  
36  
37 101 strategies deployed in real-world settings.
- 38  
39 102 • Counting with one non-randomized control arm is a strength because it allows  
40  
41 103 capturing the effect of temporal trends, regression to the mean, and the learning  
42  
43 104 curve due to the reference/background strategy to which all targeted family  
44  
45 105 physicians (FPs) are exposed, when comparing this reference strategy with the  
46  
47 106 two experimental de-implementation strategies.
- 48  
49 107 • Another strength is the use of qualitative methods to better understand from the  
50  
51 108 perspective of the study participants the reasons why (why not) the strategies  
52  
53 109 work, to explain the variations in the results achieved and to identify the essential  
54  
55 110 components of the strategy and those that will require to be optimized.  
56  
57  
58  
59  
60

- 1  
2  
3 111 • To the best of our knowledge, the DE-imFAR study is one of the firsts of its kind  
4  
5 112 that specifically uses the RE-AIM framework for the evaluation of the study results  
6  
7 113 in terms of public health impacts.  
8  
9 114 • The main limitation lies in the planned comparisons of the randomized groups with  
10  
11 115 respect to the control arm, likely to differ to some extent at baseline because of  
12  
13 116 the non-random process of generation. To tackle this limitation, in addition to  
14  
15 117 evaluating the change in PIP incidence in all eligible FPs, a matching strategy with  
16  
17 118 the selection of one matched FP from this non-randomized group for each of the  
18  
19 119 randomized FPs will be performed seeking to increase comparability and reduce  
20  
21 120 potential bias.  
22  
23  
24  
25

## 122 INTRODUCTION

123 Reducing low-value healthcare, that is, clinical practices that have not been shown to be  
124 efficient or effective, is becoming a global priority due to the widespread empirical  
125 evidence of its high prevalence across healthcare systems, potential harm and its impact  
126 on patient safety, resource use, and social inefficiency [1,2].  
127

128 Nonetheless, reducing or eliminating low-value practices is a complex matter, as drivers  
129 fostering or maintaining them seem to operate at multiple levels and be context specific.  
130 Therefore, in order to design effective and efficient corrective measures, a careful  
131 process of formal analysis of the determinants of the clinical behavior in question is  
132 needed. In this context, behavior change theory has been extensively applied to  
133 understand the factors that may influence clinical behavior, identify and design possible  
134 techniques and interventions that could be used to change it, and explain the  
135 mechanisms through which such interventions operate [3,4].  
136

137 The DE-imFAR study (from the Spanish for de-implementation of low-value  
138 pharmacological prescribing) is a two-phase project [5] that aims to apply behavioral

1  
2  
3 139 science theory within a structured process involving the main stakeholders (health  
4  
5 140 professionals, patients, and researchers) in the design, deployment, and evaluation of  
6  
7 141 targeted de-implementation strategies for reducing potentially inappropriate prescribing  
8  
9 142 (PIP). Specifically, the targeted low-value practice of the DE-imFAR study is the  
10  
11 143 pharmacological prescription of statins in the primary prevention of cardiovascular  
12  
13 144 disease (CVD) in low-risk patients. In order to prevent CVD, one of the leading causes  
14  
15 145 of morbidity and death worldwide, there is general agreement on the indication of lipid-  
16  
17 146 lowering treatment, mainly with statins, in patients with a cardiovascular risk (CVR)  
18  
19 147 greater than 10% over 10 years or in secondary prevention [6-9]. Whereas, for primary  
20  
21 148 prevention in patients with low CVR (<10%), preventive activities should be focused on  
22  
23 149 the promotion of healthy lifestyles through optimizing diet, increasing physical activity,  
24  
25 150 and stopping smoking [6-9]. Moreover, international guidelines encourage discussion  
26  
27 151 with patients concerning the benefits of lifestyle modification for the prevention of CVD,  
28  
29 152 as well as other modifiable risk factors, before considering pharmacological treatment  
30  
31 153 [7-9].  
32  
33  
34  
35

36  
37 155 Within the Phase I of the DE-imFAR study, we first conducted a cross-sectional  
38  
39 156 observational study on the incidence of PIP of statins and provision of advice for  
40  
41 157 changing lifestyles in the Basque Health Service-Osakidetza in 2018. The results  
42  
43 158 showed that the prescription of statins had increased notably in the Basque Country  
44  
45 159 (Spain) with an estimated incidence of new PIP of 10.5 per 100,000 persons/year in  
46  
47 160 patients aged 40 to 75 years, without CVD, with moderately elevated cholesterol levels  
48  
49 161 but with a CVR <5% [10].  
50  
51  
52

53  
54 163 Secondly, we applied two of the most successfully used behavior change theories in field  
55  
56 164 of Implementation Science, the Theoretical Domains Framework (TDF) [3,11,12] and  
57  
58 165 Behavior Change Wheel (BCW) [13], to a) understand and define the problem (low-value  
59  
60 166 practice) in behavioral terms and to select and specify the target behaviors; b) identify

1  
2  
3 167 the factors that may influence it; and c) map targeted de-implementation and  
4  
5 168 implementation strategies conducive to reducing the low-value practice in question.  
6  
7 169 Briefly, after having prioritized our specific target behavior (that is “clinician decision-  
8  
9 170 making on intervention/treatment to be provided based on objective clinical information  
10  
11 171 and subjective schemas and heuristics”), identified determinants (facilitators of the non-  
12  
13 172 desired behavior of PIP of statins and barriers to applying the recommended clinical  
14  
15 173 practice behavior of promoting healthy lifestyles), and mapped specific behavior change  
16  
17 174 techniques, three types of de-implementation strategies were selected based on being  
18  
19 175 the most potentially effective, feasible, and acceptable for influencing decision-making  
20  
21 176 through different mechanisms [14]. Hence, the three strategies derived from the  
22  
23 177 systematic theory- and evidence-based intervention design process were: a) a non-  
24  
25 178 reflective decision assistance strategy based on providing evidence-based information  
26  
27 179 communication technology tools to help and guide decision-making; b) a decision  
28  
29 180 information strategy based on the dissemination of the evidence concerning CVD  
30  
31 181 primary prevention framed in a corporate campaign encouraging family physicians (FPs)  
32  
33 182 to move away from PIP; and c) a reflective decision structure strategy encouraging  
34  
35 183 reflection on actual performance based on an audit/feedback system [14].  
36  
37  
38  
39  
40

41 185 According to the literature review performed in Phase I of the DE-imFAR project [14]  
42  
43 186 regarding the evaluation of effective intervention strategies for the reduction of low-value  
44  
45 187 prescribing [15-24], multicomponent interventions—combining passive dissemination  
46  
47 188 interventions, based on training in or dissemination of clinical practice guidelines (CPGs),  
48  
49 189 with more proactive interventions incorporating decision-making aids or the sending of  
50  
51 190 audit/feedback— achieve the most positive results. Specifically, in the context of PIP of  
52  
53 191 statins, a positive impact has been observed on documentation of CVR and prescription  
54  
55 192 adequacy using a) multi-component dissemination strategies including informative web  
56  
57 193 pages, and implementation of electronic CPGs compared to routine practice and training  
58  
59 194 activities, and b) interventions based on sending clinical scenarios and cases, and  
60

1  
2  
3 195 audit/feedback to professionals, and decision support tools [19-23]. All these strategies  
4  
5 196 can be conceived and theoretically differentiated as a function of the way they may affect  
6  
7 197 clinicians' decision-making [25]. There is plenty of evidence demonstrating that it is  
8  
9 198 possible to de-implement inappropriate medical practices through the lens of clinician  
10  
11 199 cognition using audit/feedback, decision support tools, etc. [26-28]. In this context, the  
12  
13 200 growing field of choice architecture aims to explore how the structure and framing of  
14  
15 201 decision situations influence the choice of certain behaviors over alternative ones. On  
16  
17 202 the one hand, FPs' decision-making ability can be influenced by unconscious processes  
18  
19 203 that occur in response to environmental or emotive cues, that is, through type 1 (or non-  
20  
21 204 reflective) cognition. On the other, clinicians' conscious intention to change can be  
22  
23 205 promoted by engaging their reflective cognition to consciously evaluate and correct their  
24  
25 206 inappropriate behavior, that is, using type 2 (or reflective) cognition [29]. However, further  
26  
27 207 research is needed to determine whether these evidence-based and barrier-specific  
28  
29 208 strategies for de-implementation identified in DE-imFAR Phase I are also effective in our  
30  
31 209 context.  
32  
33  
34  
35  
36

37 211 Thus, the goal of the present Phase II of the DE-imFAR study is to assess the potential  
38  
39 212 effectiveness and feasibility of this set of de-implementation strategies to reduce the PIP  
40  
41 213 of statins in the primary prevention of CVD (low-risk patients, REGICOR [30] CVR score  
42  
43 214 <7.5%, with moderately elevated cholesterol levels, low-density lipoprotein (LDL)  
44  
45 215 cholesterol levels between 70 and 189 mg/dL and/or total cholesterol (TC) between 200  
46  
47 216 and 289 mg/dL, but without ischemic heart disease/CVD).  
48  
49  
50

51 218 Specifically, we aim to answer the following research questions:

52  
53 219 1. Observational comparison questions:

54  
55 220 As compared to a reference non-reflective decision assistance strategy based on  
56  
57 221 reminders and decision support tools incorporated into the electronic health record  
58  
59 222 (EHR) for helping clinical decision-making, what is the effect on the incidence of PIP of  
60

1  
2  
3 223 statins in CVD primary prevention and the rate of delivery of healthy lifestyle counseling  
4  
5 224 of a) a decision information strategy comprising a corporate “Stopping Low-Value  
6  
7 225 Prescribing” campaign and the dissemination of evidence-based CPGs for the primary  
8  
9 226 prevention of CVD; b) a reflective decision structure strategy based on an audit/feedback  
10  
11 227 system; and c) any intervention based on a reflective de-implementation strategy (a or  
12  
13 228 b)?  
14  
15  
16 229

17  
18 230 2. Experimental comparison question:

19  
20 231 As compared to a decision information strategy comprising a corporate “Stopping Low-  
21  
22 232 Value Prescribing” campaign and the dissemination of evidence-based CPGs for the  
23  
24 233 primary prevention of CVD, together with the non-reflective decision assistance  
25  
26 234 intervention based on reminders and decision support tools incorporated into the EHR  
27  
28 235 for helping clinical decision-making, what is the effect on the incidence of PIP of statins  
29  
30 236 in CVD primary prevention and the rate of delivery of healthy lifestyle counseling of  
31  
32 237 adding a reflective decision structure strategy based on an audit/feedback system?  
33  
34  
35 238

## 36 239 **METHODS AND ANALYSIS**

### 37 38 39 240 **Design**

40  
41 241 A cluster randomized implementation trial with an additional control group will be  
42  
43 242 conducted for evaluating the potential effectiveness and feasibility of three de-  
44  
45 243 implementation strategies (Figure 1). A mixed methods evaluation will be undertaken:  
46  
47 244 quantitative for assessing the implementation results at the professional level  
48  
49 245 (effectiveness outcomes regarding changes in rates of PIP and healthy lifestyle  
50  
51 246 counseling) and qualitative for assessing the feasibility and perceived impact of the de-  
52  
53 247 implementation strategies from the FPs’ perspective and the experience and satisfaction  
54  
55 248 of patients concerning the clinical care received. The unit of randomization and  
56  
57 249 intervention will be the primary care FP, while observation and analysis will be performed  
58  
59 250 at professional and patient levels. The DE-imFAR research protocol was reviewed and  
60

1  
2  
3 251 approved by the Basque Country Clinical Research Ethics Committee (Reference:  
4  
5 252 EOM2022018, approved on 30 March 2022) and was registered in the U.S. NLM  
6  
7 253 ClinicalTrials.gov database (ClinicalTrials.gov Identifier NCT04022850, Registered 17  
8  
9 254 July 2019; Last update 31 January 2024).

10  
11 255

12  
13 256 Osakidetza-Basque Health Service provides universal coverage and services are free at  
14  
15 257 the point of use, aside from co-payment for drugs, funded through regional general  
16  
17 258 taxation. Primary, specialized, and social health-related service provision is organized  
18  
19 259 around 13 Integrated Healthcare Organizations (IHOs) that cover the 3 provinces of the  
20  
21 260 region of the Basque Country: Araba, Bizkaia, and Gipuzkoa. Each resident is on the list  
22  
23 261 of one FP or pediatrician who offers comprehensive primary care and refers patients for  
24  
25 262 hospital and specialty services. Primary care professionals work in full-time teams,  
26  
27 263 including FPs, pediatricians, nurses, and administrative staff based at local centers  
28  
29 264 providing access to healthcare for users in a defined geographical area.

30  
31 265 We used the SPIRIT reporting guidelines and the SPIRIT checklist when writing the  
32  
33 266 present study [31].

34  
35 267

## 36 37 268 **Participants**

38  
39 269 Eligibility criteria for the study will be:

- 40  
41 270 1. Professionals: FPs belonging to any of the 13 IHOs of Osakidetza with a non-zero  
42  
43 271 annual incidence rate of PIP of statins at baseline (2021) with a minimum cluster size of  
44  
45 272  $n \geq 10$  patients
- 46  
47 273 2. Patients: All 40- to 74-year-old men and 45- to 74-year-old women with no history of  
48  
49 274 statin use, LDL cholesterol levels between 70 and 189 mg/dL and/or TC between 200  
50  
51 275 and 289 mg/dL but without ischemic heart disease/CVD, and an estimated CVR  
52  
53 276 REGICOR  $< 7.5\%$  who attend at least one appointment at the participating FPs' practices  
54  
55 277 during the study period from May 2022 to May 2023, and followed until May 2024.

56  
57 278



## 279 **Clinical interventions**

280 The DE-imFAR study, with regard to the prescription of statins in primary prevention of  
281 CVD, follows the clinical practice recommendations in Osakidetza-Basque Health  
282 Service and the Spanish National Health System [6] as well as several international  
283 guidelines [7-9]. Thus, these are the recommendations concerning when to initiate  
284 treatment in primary prevention of CVD [6, 32]:

- 285     ▪ For individuals aged 40 to 75 years with an estimated 10-year CVR REGICOR  
286         >10%, initiation of statin therapy is recommended.
- 287     ▪ In general, for individuals aged 40 to 75 years with CVR REGICOR <10% and  
288         LDL cholesterol levels <190 mg/dL, it is recommended not to initiate statin  
289         therapy, with the following considerations:
  - 290             ○ with CVR close to 10%, consider the presence of risk-enhancing factors  
291                 in decision-making.
  - 292             ○ with CVR <5%, it is recommended not to initiate statin therapy.
- 293     ▪ For patients with LDL cholesterol levels  $\geq 190$  mg/dL, it is recommended to assess  
294         the presence of genetic dyslipidemia and potential cardiovascular risk-enhancing  
295         factors. It is suggested to initiate statin therapy, together with healthy lifestyle  
296         recommendations, regardless of cardiovascular risk.

297 In any case, the indication for treatment should be preceded and/or accompanied by  
298 promotion of healthy lifestyles through healthful diet, regular physical activity and  
299 smoking cessation. Moreover, it is recommended that the decision to initiate statin  
300 therapy should consider individual baseline risk, absolute risk reduction and whether the  
301 risk reduction justifies the potential harms and undesirable consequences of taking a  
302 lifelong daily medication.

303

## 304 **De-implementation strategies evaluated**

1  
2  
3 305 Within the present Phase II of the DE-imFAR study, the three types of strategies that  
4  
5 306 were derived from Phase I systematic theory- and evidence-based intervention design  
6  
7 307 process will be set up (see Supplemental file 1 for a more detailed description):  
8

9 308 1) *A non-reflective decision assistance strategy*, that targets type 1 cognitive processes  
10  
11 309 through decision support systems that prompt and remind FPs about the recommended  
12  
13 310 practice in a simplified way, thereby reducing the cognitive burden. In short, pop-up  
14  
15 311 reminders and alerts with associated messages will be incorporated into the REGICOR  
16  
17 312 CVR calculator in OSABIDE (Osakidetza's EHR system) and within the prescription  
18  
19 313 pathway in PRESBIDE (the electronic drug prescribing component). The tools devised  
20  
21 314 include an interactive media-based algorithm stating the recommended practice for the  
22  
23 315 primary prevention of CVD in low-risk patients developed by an expert panel, and a  
24  
25 316 patient information sheet depicting and promoting evidence-based practice for  
26  
27 317 addressing cholesterol in the primary prevention of CVD in low-risk patients.  
28  
29

30 318 2) *A both reflective and non-reflective decision information strategy*, targeting both types  
31  
32 319 1 and 2 cognitive processes, based on the principle of knowledge dissemination and  
33  
34 320 consisting of a "Stopping Low-Value Prescribing" campaign run by the organization  
35  
36 321 (Osakidetza- Basque Health Service) that also eases access (decreasing the physical  
37  
38 322 effort required) to the evidence-based CPGs for the primary prevention of CVD in low-  
39  
40 323 risk patients.  
41  
42

43 324 3) *A reflective decision structure strategy*, that targets type 2 cognition through an  
44  
45 325 audit/feedback system reporting data with practice- and organizational-level  
46  
47 326 performance indicators regarding PIP of statins and healthy lifestyle promotion to prompt  
48  
49 327 reflection about their own care practice, provided along with intention formation and goal-  
50  
51 328 setting-focused messages.  
52

53  
54 329

### 55 330 **Allocation of intervention units to compared groups**

56  
57 331 The DE-imFAR study is a cluster randomized implementation trial conducted under real  
58  
59 332 world conditions of primary prevention of CVD in Primary Care (PC) where both clinical  
60

1  
2  
3 333 practices, i.e., inappropriate statin prescription and substandard promotion of healthy  
4  
5 334 lifestyles, occur. The aforementioned de-implementation strategies will be cumulatively  
6  
7 335 deployed in the routine conditions of health care service provision in Osakidetza to  
8  
9 336 reduce the low-value practice and increase the recommended practice of PC healthcare  
10  
11 337 professionals. Specifically, the decision support tools integrated in the EHR (non-  
12  
13 338 reflective decision assistance strategy) will be applied to all FPs from the 13 IHOs of  
14  
15 339 Osakidetza. Further, in addition to this first strategy, eligible FPs belonging to two IHOs  
16  
17 340 (Barakaldo-Sestao and Ezkerraldea-Enkarterri-Cruces) will be randomly assigned to  
18  
19 341 exposure to either the second (provision of decision information strategy) or second and  
20  
21 342 third (provision of decision information and reflective decision structure strategies). The  
22  
23 343 allocation sequence within these two groups will be generated using a specific restricted  
24  
25 344 randomization scheme by one member of the research team. The sequence will be  
26  
27 345 concealed at the coordinating center. In all cases, FPs will only be allocated to the study  
28  
29 346 groups after they have agreed to participate through an opt-out strategy. The data  
30  
31 347 analyst and the staff in charge of measurements will be blind to FP allocation to study  
32  
33 348 arms. Given that the audit/feedback strategy will involve regular reports sent privately to  
34  
35 349 individuals, participants in the experimental arms are also expected to be blind to group  
36  
37 350 allocation.  
38  
39  
40  
41  
42

### 43 352 **Outcome measures**

44  
45 353 To evaluate the implementation of the de-implementation strategies compared in terms  
46  
47 354 of public health impact, we will use the following dimensions of the Reach, Effectiveness,  
48  
49 355 Adoption, Implementation, and Maintenance (RE-AIM) framework [33]:

#### 51 356 *Reach*

52  
53 357 Absolute number and percentage of patients in the target population who received the  
54  
55 358 recommended CVD primary prevention clinical intervention 12 months following FP's  
56  
57 359 exposure to the de-implementation strategies compared; and their representativeness.

#### 59 360 *Effectiveness*

1  
2  
3 361 The study's main outcome will measure both the change in the incidence of the PIP of  
4  
5 362 statins and the change in the incidence of the provision of advice regarding healthy  
6  
7 363 lifestyles in patients of the target population eligible for CVD primary prevention, from  
8  
9 364 baseline to 12 months after exposure of target FPs to the de-implementation strategies.

10  
11 365

12  
13 366 As a secondary outcome, we will measure the change in the incidence of CVR  
14  
15 367 (REGICOR) documentation in the EHR, from baseline to 12 months after exposure of  
16  
17 368 FPs to the de-implementation strategies compared, in 40- to 74-year-old men and 45- to  
18  
19 369 74-year-old women without ischemic heart disease/CVD.

20  
21  
22 370 *Adoption*

23  
24 371 Degree to which the recommended CVD primary prevention clinical intervention is  
25  
26 372 adopted by the FPs 12 months after exposure to the de-implementation strategies, that  
27  
28 373 will be measured by the percentage of FPs who reduce PIP of statins and/or increase  
29  
30 374 health promotion activities in the target population; and their representativeness.

31  
32 375 *Implementation*

33  
34 376 The fidelity of the delivery of each de-implementation strategy under study (i.e., the  
35  
36 377 degree to which they have been executed as planned) will be evaluated. To this end, a  
37  
38 378 complete record and subsequent description of the execution process, documentation of  
39  
40 379 adaptations made to the planned strategies, and process indicators of the delivery of and  
41  
42 380 exposure to the interventions (see Supplemental file 1 for specification of the exposure  
43  
44 381 to each strategy), will be used to assess the following components of fidelity: adherence,  
45  
46 382 dose, quality of delivery, professionals' responsiveness and program differentiation [34].

47  
48 383 *Maintenance*

49  
50 384 Change in the incidence of PIP of statins and provision of healthy lifestyle counseling in  
51  
52 385 eligible patients, 24 months after exposure of FPs to the de-implementation strategies  
53  
54 386 compared to levels observed at the 12-month assessment.

55  
56 387

57  
58 388 *Other study covariates*

1  
2  
3 389 In addition, and informed by the cross-sectional observational study performed in the  
4  
5 390 Phase I of the DE-imFAR study [10], potential confounders that may bias the estimated  
6  
7 391 effect of the de-implementation strategies on the change in PIP of statins will be  
8  
9 392 measured, both at a) health professional level: sociodemographic variables (age, sex),  
10  
11 393 baseline rate of PIP of statins; and b) patient level: socio-demographic variables (age,  
12  
13 394 sex, socioeconomic status) and clinical variables (baseline cholesterol level, presence  
14  
15 395 of hypertension, prescribed anti-hypertensive, tobacco use).  
16  
17  
18 396

### 397 **Feasibility Evaluation**

398 The professionals' perception of the feasibility of and satisfaction with the de-  
399 implementation strategies to enhance the provision of the recommended CVD  
400 prevention clinical practice will be assessed through key-informant semi-structured  
401 individual interviews. Interviews will be carried out with at least 12 professionals until  
402 data saturation is reached: at least six (three from each randomized arm) who reduced  
403 their PIP and at least six who did not, as informed by the quantitative results. The  
404 interview script will contain open-ended questions that will focus on the perceived value  
405 of the de-implementation strategies and recommendations for their optimization.  
406

407 Exposed patients' perception and experience regarding the quality of CVD prevention  
408 care received will also be assessed through key-informant semi-structured interviews.  
409 The interviews will be carried out with at least ten patients until data saturation is reached:  
410 at least five with patients who have been clinically managed according to recommended  
411 practice and five who have not. The interview script will contain open-ended questions  
412 that will focus on the perceived CVD primary prevention care received.  
413

414 Both professional and patient interviews will be conducted by two researchers with  
415 experience in qualitative research methods, as well as knowledge of the clinical field and  
416 the project. The interviews will be audio-recorded, with prior informed consent, and

1  
2  
3 417 transcribed verbatim. Regarding the analysis of the qualitative study, the responses will  
4  
5 418 be extracted from the transcript of the interviews. Several members of the research team  
6  
7 419 will participate in the analysis, promoting the exchange of perspectives and consensus,  
8  
9 420 with the aim of triangulating the analysis. A deductive and an inductive perspective will  
10  
11 421 be combined. For the deductive perspective, the discourse of each professional and  
12  
13 422 patient interviewed will be associated with constructs derived from the behavior changes  
14  
15 423 theories (TDF, BCW, etc.) [3,11-13]. The inductive analysis will be based on the  
16  
17 424 postulates of grounded theory [35]. Researchers will use coding techniques, or line-by-  
18  
19 425 line analysis, looking for words and phrases that identify explanatory concepts.  
20  
21 426 Subsequently, thematic connections between the basic theoretical concepts and the  
22  
23 427 data will be developed.  
24  
25  
26  
27

428

#### 429 **Analysis**

430 Frequencies and proportions along with the corresponding 95% confidence intervals  
431 (CIs) will be used to describe the prevalence and cumulative incidence of PIP of statins  
432 and healthy lifestyle counseling in the primary prevention of CVD by FPs. The primary  
433 effectiveness outcomes will be the changes in the cumulative incidence of PIP of statins  
434 and healthy lifestyle counseling in patients from the target population (individuals with no  
435 history of statin use, LDL cholesterol levels between 70 and 189 mg/dL and/or TC  
436 between 200 and 289 mg/dL without past or current ischemic heart disease/CVD, and  
437 an estimated CVR REGICOR <7.5% attending at least one clinical appointment with their  
438 FP in the study period), from baseline to 12 months after exposure of FPs to the de-  
439 implementation strategies. Therefore, to evaluate the impact of the three de-  
440 implementation strategies, we will estimate the relative reduction in the risk of receiving  
441 PIP of statins in patients from the target population assigned to the experimental  
442 strategies over that in patients from the non-randomized group (non-reflective decision  
443 assistance strategy group). With respect to this group and seeking to increase  
444 comparability and reduce potential bias, in addition to evaluating the change in PIP of

1  
2  
3 445 statins incidence in all eligible FPs, we will select two matched FP from this non-  
4  
5 446 randomized group for each of the randomized FPs taking into account both FP-related  
6  
7 447 characteristics (e.g., baseline rate of PIP of statins, etc.) and characteristics of the  
8  
9 448 population of patients assigned to the FP (e.g., average socioeconomic status, etc.).  
10  
11 449 Change in PIP of statins incidence rates from baseline to those observed 12 and 24  
12  
13 450 months after FPs' exposure to the de-implementation strategies and the relative risk  
14  
15 451 reduction will be estimated with the corresponding 95% CIs. To adjust for potential  
16  
17 452 confounding factors, stratified statistical analyses and logistic models will be used. These  
18  
19 453 models will be extended to generalized mixed effects models to take into account the  
20  
21 454 hierarchical structure of data (patients nested in FPs and FPs in primary care teams),  
22  
23 455 with fixed effects (comparison group, effect of time on outcome indicators, and time-  
24  
25 456 group interactions) and random effects on the intercept and the time slope (for each  
26  
27 457 patient, FP, center, etc.). These models will be adjusted for potential confounders,  
28  
29 458 following a backward strategy, guided by the stratified analyses. A similar approach will  
30  
31 459 be taken to analyze the secondary outcomes. The analyses will be carried out with SAS  
32  
33 460 (v. 9.2, SAS Institute, Cary, NC, USA), and R (R Development Core Team, 2014).  
34  
35 461

36  
37  
38  
39 462 Calculation of the required sample size for the most unfavorable scenario, this being the  
40  
41 463 comparison between the two randomized de-implementation strategies, was based on:  
42  
43 464 i) a baseline incidence of statin PIP of 7.4% estimated among the patients of the target  
44  
45 465 population seen in 2021 by FPs with an incidence of PIP > 0% with a minimum cluster  
46  
47 466 size  $n \geq 10$  patients, ii) an intra-class correlation coefficient of 0.01, iii) an average cluster  
48  
49 467 size of 39 patients with a coefficient of variation of 0.63, iv)  $\alpha = 0.05$  and statistical power  
50  
51 468 of 80%, and v) hypothetical decreases in annual PIP rates of 20% in the decision  
52  
53 469 information strategy group and 50% in the decision structure strategy group. With these  
54  
55 470 assumptions, it was estimated that at least 58 FPs were required for each experimental  
56  
57 471 arm.  
58  
59  
60 472

### 473 **Management, quality, and safety in data processing**

474 This study will be carried out in accordance with the international standards for  
475 conducting epidemiological studies, included in the International Guidelines for Ethical  
476 Review of Epidemiological Studies [36]. This is a prospective intervention study focused  
477 mainly on the collection of information from data recorded by health professionals in the  
478 Osakidetza EHR (OSABIDE) under routine clinical practice conditions. The process  
479 indicators related to the clinical practice of the professionals (prescription of statins and  
480 record in the EHR of provision of personalized healthy lifestyles advice concerning the  
481 need to increase physical activity, eat a healthy diet and smoking cessation), patients'  
482 sociodemographic and clinical characteristics (age, sex, CVR, active health problems  
483 recorded in EHR, socioeconomic status, etc.) and clinical outcomes will be extracted  
484 from OSABIDE through the corporate Oracle Business Intelligence platform. In  
485 particular, for the provision of healthy lifestyles advice, OSABIDE includes a specific  
486 electronic form to check that each single piece of advice (diet, exercise, tobacco quitting)  
487 has/has not been provided. The Primary Care Research Unit of Bizkaia is formally  
488 authorized to extract and use data from the EHR for research purposes by the Healthcare  
489 Directorate of Osakidetza. On the other hand, it will be necessary to inform participants  
490 about the study and obtain their written informed consent concerning the information  
491 collected directly from the professionals and patients under study through the key-  
492 informant semi-structured interviews (Supplemental File 2 and 3). All the information  
493 regarding the study subjects, either extracted from EHRs or collected from the  
494 participants expressly for this research, will be protected and treated confidentially for all  
495 purposes, in accordance with the provisions of the Spanish Organic Law 3/2018, of 5  
496 December, on Personal Data Protection and digital rights guarantee (LOPD-GDD) and  
497 the provisions of Regulation (EU) 2016/679 of the European Parliament and of the  
498 Council of 27 April 2016, on the protection of natural persons with regard to the  
499 processing of personal data and on the free movement of such data (General Data  
500 Protection Regulation, RGPD). Specifically, all data will be documented anonymously



1  
2  
3 501 and de-identified, linked to a unique key that is meaningless outside the context of the  
4  
5 502 system. The final resulting database will be exported to a formatted plain text file that will  
6  
7 503 then be compressed and encrypted using a secure algorithm and subsequently be  
8  
9 504 processed and included in a robust and secure database server.  
10

11 505

## 12 506 **Patient and public involvement**

13  
14  
15 507 Patients were involved in the DE-imFAR Phase I project as one of the main stakeholders  
16  
17 508 (health professionals, patients, and researchers) in the formative process conducted to  
18  
19 509 map and design de-implementation strategies to reduce PIP, which will be evaluated in  
20  
21 510 the DE-imFAR Phase II project. Specifically, during the Phase I project, a focus group  
22  
23 511 with six patients was conducted to ascertain patients' experience regarding the clinical  
24  
25 512 practice of statin prescription and triangulate physicians discourse [14].  
26  
27  
28

29 513 During the Phase II project, semi-structured interviews will be conducted with patients to  
30  
31 514 assess their perception and experience of the clinical care received as a result of their  
32  
33 515 healthcare professionals' exposure to the different de-implementation strategies. These  
34  
35 516 interviews will help to better understand from the perspective of the study participants  
36  
37 517 the reasons why the strategies work (or do not work), to explain the variations in the  
38  
39 518 outcomes achieved and to identify the key components and those that need to be  
40  
41 519 optimized as well as triangulating the analysis.  
42  
43  
44

45 520

## 46 521 **ETHICS AND DISSEMINATION**

47  
48  
49 522 The research protocol (version 1; 170221) has been approved by the Basque Country  
50  
51 523 Clinical Research Ethics Committee (Reference: EOM2022018, approved on 30 March  
52  
53 524 2022) and was registered in the U.S. NLM ClinicalTrials.gov database (ClinicalTrials.gov  
54  
55 525 Identifier NCT04022850, Registered 17 July 2019; Last update 31 January 2024).The  
56  
57 526 Primary Care Research Unit of Bizkaia is explicitly authorized by the Healthcare  
58  
59 527 Directorate of Osakidetza - Basque Health Service to extract and use data from EHRs  
60

1  
2  
3 528 for research purposes. Since data supporting the present study will mostly concern  
4  
5 529 routine data retrieved from the EHR of the Basque Health Service-Osakidetza, it will be  
6  
7 530 only shared on justified request to the study guarantors. The results of this study will be  
8  
9 531 disseminated via publication in scientific peer-reviewed journals.  
10

11 532

### 13 533 **LIST OF ABBREVIATIONS**

14  
15  
16 534 EHR: Electronic health record

17  
18 535 BCW: Behavior Change Wheel

19  
20 536 CI: Confidence interval

21  
22 537 CVD: Cardiovascular disease

23  
24 538 CVR: Cardiovascular risk

25  
26 539 CPG: Clinical practice guideline

27  
28 540 FP: Family physician

29  
30 541 IHO: Integrated Healthcare Organization

31  
32 542 LDL: Low-density lipoprotein

33  
34 543 PIP: Potentially inappropriate prescribing

35  
36 544 PC: Primary care

37  
38 545 RE-AIM: Reach, Effectiveness, Adoption, Implementation, and Maintenance

39  
40 546 TC: Total cholesterol

41  
42 547 TDF: Theoretical Domains Framework

43  
44  
45 548

### 47 549 **FULL REFERENCES**

48  
49 550 1. Morgan DJ, Brownlee S, Leppin AL, et al. Setting a research agenda for medical overuse. *BMJ*.  
50 551 2015;351:h4534. doi: 10.1136/bmj.h4534.

51  
52 552

53 553 2. Niven DJ, Mrklas KJ, Holodinsky JK, et al. Towards understanding the de-adoption of low-value clinical  
54 554 practices: a scoping review. *BMC Med*. 2015;13:255. doi: 10.1186/s12916-015-0488-z.

55  
56 555

57 556 3. Michie S, Johnston M, Abraham C, et al. Making psychological theory useful for implementing evidence  
58 557 based practice: a consensus approach. *Qual Saf Health Care*. 2005;14(1):26-33.  
59 558 doi:10.1136/qshc.2004.011155.

- 1  
2  
3 559  
4 560 4. Eccles M, Grimshaw J, Walker A, et al. Changing the behavior of healthcare professionals: the use of  
5 561 theory in promoting the uptake of research findings. *J Clin Epidemiol.* 2005;58(2):107-112.  
6 562 doi:10.1016/j.jclinepi.2004.09.002.  
7  
8 563  
9 564 5. Sanchez A, Pijoan JI, Pablo S, et al. Addressing low-value pharmacological prescribing in primary  
10 565 prevention of CVD through a structured evidence-based and theory-informed process for the design and  
11 566 testing of de-implementation strategies: the DE-imFAR study. *Implement Sci.* 2020;15(1):8. Published 2020  
12 567 Jan 22. doi:10.1186/s13012-020-0966-3  
13  
14 568  
15 569 6. Grupo de trabajo de la Guía de Práctica Clínica sobre el manejo de los lípidos como factor de riesgo  
16 570 cardiovascular. *Guía de Práctica Clínica sobre el manejo de los lípidos como factor de riesgo cardiovascular.*  
17 571 Ministerio de Sanidad, Servicios Sociales e Igualdad. OSTEBA; 2017. Guías de Práctica Clínica en el SNS.  
18 572  
19 573 7. National Institute for Health and Care Excellence. Cardiovascular disease: risk assessment and reduction,  
20 574 including lipid modification. [London]: NICE; 2014. [updated 2023 Feb 10] (Clinical guideline [CG181]).  
21 575 Available from: <https://www.nice.org.uk/guidance/cg181>.  
22 576  
23 577 8. Arnett DK, Blumenthal RS, Albert MA, et al. 2019 ACC/AHA Guideline on the Primary Prevention of  
24 578 Cardiovascular Disease: A Report of the American College of Cardiology/American Heart Association Task  
25 579 Force on Clinical Practice Guidelines [published correction appears in *Circulation.* 2019 Sep  
26 580 10;140(11):e649-e650] [published correction appears in *Circulation.* 2020 Jan 28;141(4):e60] [published  
27 581 correction appears in *Circulation.* 2020 Apr 21;141(16):e774]. *Circulation* 2019;140(11):e596-e646.  
28 582 doi:10.1161/CIR.0000000000000678.  
29 583  
30 584 9. Mach F, Baigent C, Catapano AL, et al. 2019 ESC/EAS Guidelines for the management of dyslipidaemias:  
31 585 lipid modification to reduce cardiovascular risk [published correction appears in *Eur Heart J.* 2020 Nov  
32 586 21;41(44):4255]. *Eur Heart J.* 2020;41(1):111-188. doi:10.1093/eurheartj/ehz455.  
33 587  
34 588 10. Elizondo-Alzola U, Sánchez A, Pijoan JI, et al. Statins in primary prevention of cardiovascular disease:  
35 589 incidence of potentially inappropriate prescriptions in very low risk primary care patients and associated  
36 590 factors. *J Gen Pract.* 2022;10:456. doi: 10.37421/2329-9126.22. 10.461  
37 591  
38 592 11. Cane J, O'Connor D, Michie S. Validation of the theoretical domains framework for use in behaviour  
39 593 change and implementation research. *Implement Sci.* 2012;7:37. doi:10.1186/1748-5908-7-37.  
40 594  
41 595 12. Atkins L, Francis J, Islam R, et al. A guide to using the Theoretical Domains Framework of behaviour  
42 596 change to investigate implementation problems. *Implement Sci.* 2017;12(1):77. doi: 10.1186/s13012-017-  
43 597 0605-9.  
44 598  
45 599 13. Michie S, van Stralen MM, West R. The behaviour change wheel: a new method for characterising and  
46 600 designing behaviour change interventions. *Implement Sci.* 2011 23;6:42. Published 2011 Apr 23.  
47 601 doi:10.1186/1748-5908-6-42.  
48 602  
49  
50  
51  
52  
53  
54  
55  
56  
57  
58  
59  
60

- 1  
2  
3 603 14. Sanchez A, Elizondo-Alzola U, Pijoan JI, et al. Applying the behavior change wheel to design de-  
4 604 implementation strategies to reduce low-value statin prescription in primary prevention of cardiovascular  
5 605 disease in primary care. *Front Med (Lausanne)*. 2022;9:967887. Published 2022 Oct 13.  
6 606 doi:10.3389/fmed.2022.967887.  
7  
8 607  
9 608 15. Prasad V, Ioannidis JP. Evidence-based de-implementation for contradicted, unproven, and aspiring  
10 609 healthcare practices. *Implement Sci*. 2014;9:1. Published 2014 Jan 8. doi:10.1186/1748-5908-9-1.  
11  
12 610  
13 611 16. Grimshaw JM, Thomas RE, MacLennan G, et al. Effectiveness and efficiency of guideline dissemination  
14 612 and implementation strategies. *Health Technol Assess*. 2004;8(6):iii-iv, 1-72. doi:10.3310/hta8060.  
15 613  
16 614 17. Jamtvedt G, Young JM, Kristoffersen DT, et al. Audit and feedback: effects on professional practice and  
17 615 health care outcomes. *Cochrane Database Syst Rev*. 2006;(2):CD000259. Published 2006 Apr 19.  
18 616 doi:10.1002/14651858.CD000259.pub2.  
19 617  
20 618 18. Kawamoto K, Houlihan CA, Balas EA, et al. Improving clinical practice using clinical decision support  
21 619 systems: a systematic review of trials to identify features critical to success. *BMJ*. 2005;330(7494):765.  
22 620 doi:10.1136/bmj.38398.500764.8F.  
23 621  
24 622 19. Keller H, Krones T, Becker A, et al. Arriba: effects of an educational intervention on prescribing behaviour  
25 623 in prevention of CVD in general practice. *Eur J Prev Cardiol*. 2012;19(3):322-9.  
26 624 doi:10.1177/1741826711404502.  
27 625  
28 626 20. Arcoraci V, Santoni L, Ferrara R, et al. Effect of an educational program in primary care: the case of lipid  
29 627 control in cardio-cerebrovascular prevention. *Int J Immunopathol Pharmacol*. 2014;27(3):351-63.  
30 628 doi:10.1177/039463201402700305.  
31 629  
32 630 21. Dormuth CR, Carney G, Taylor S, et al. A randomized trial assessing the impact of a personal printed  
33 631 feedback portrait on statin prescribing in primary care. *J Contin Educ Health Prof*. 2012;32(3):153-62.  
34 632 doi:10.1002/chp.21140.  
35 633  
36 634 22. Harris MF, Parker SM, Litt J, et al. Implementing guidelines to routinely prevent chronic vascular disease  
37 635 in primary care: the Preventive Evidence into Practice cluster randomised controlled trial. *BMJ Open*.  
38 636 2015;5(12):e009397. Published 2015 Dec 11. doi:10.1136/bmjopen-2015-009397.  
39 637  
40 638 23. Liddy C, Hogg W, Singh J, et al. A real-world stepped wedge cluster randomized trial of practice  
41 639 facilitation to improve cardiovascular care. *Implement Sci*. 2015;10:150. Published 2015 Oct 28.  
42 640 doi:10.1186/s13012-015-0341-y.  
43 641  
44 642 24. Colla CH, Mainor AJ, Hargreaves C, et al. Interventions Aimed at Reducing Use of Low-Value Health  
45 643 Services: A Systematic Review. *Med Care Res Rev*. 2017;74(5):507-550. doi:10.1177/1077558716656970.  
46 644  
47 645 25. Münscher R, Vetter M, Scheuerle T. A review and taxonomy of choice architecture techniques. *J Behav*  
48 646 *Decis Mak*. 2016;29(5):511-24. doi.org/10.1002/bdm.1897.  
49  
50  
51  
52  
53  
54  
55  
56  
57  
58  
59  
60 647

- 1  
2  
3 648 26. Last BS, Buitenheim AM, Timon CE, Mitra N, et al. Systematic review of clinician-directed nudges in  
4 649 healthcare contexts. *BMJ Open*. 2021;11(7):e048801. Published 2021 Jul 12. doi:10.1136/bmjopen-2021-  
5 650 048801.  
6  
7 651  
8 652 27. Yoong SL, Hall A, Stacey F, et al. Nudge strategies to improve healthcare providers' implementation of  
9 653 evidence-based guidelines, policies and practices: a systematic review of trials included within Cochrane  
10 654 systematic reviews. *Implement Sci*. 2020;15(1):50. Published 2020 Jul 1. doi:10.1186/s13012-020-01011-  
11 655 0.  
12  
13 656  
14 657 28. Lamprell K, Tran Y, Arnold G, et al. Nudging clinicians: A systematic scoping review of the literature. *J*  
15 658 *Eval Clin Pract*. 2021;27(1):175-192. doi:10.1111/jep.13401.  
16  
17 659  
18 660 29. Helfrich CD, Rose AJ, Hartmann CW, et al. How the dual process model of human cognition can inform  
19 661 efforts to de-implement ineffective and harmful clinical practices: A preliminary model of unlearning and  
20 662 substitution. *J Eval Clin Pract*. 2018;24(1):198-205. doi:10.1111/jep.12855.  
21  
22 663  
23 664 30. D'Agostino RB Sr, Grundy S, Sullivan LM, et al. Validation of the Framingham coronary heart disease  
24 665 prediction scores: results of a multiple ethnic groups investigation. *JAMA*. 2001;286(2):180-187.  
25 666 doi:10.1001/jama.286.2.180.  
26  
27 667  
28 668 31. Chan A-W, Tetzlaff JM, Altman DG, et al. SPIRIT 2013 Statement: Defining standard protocol items for  
29 669 clinical trials. *Ann Intern Med*. 2013 Feb 5;158(3):200-207. doi: 10.7326/0003-4819-158-3-201302050-  
30 670 00583.  
31  
32 671  
33 672 32. COLESTEROL Y PREVENCIÓN PRIMARIA DE LA ENFERMEDAD CARDIOVASCULAR: El debate  
34 673 continúa. *INFAC*. 2022;30(7):65-75.  
35  
36 674  
37 675 33. Glasgow RE, Vogt TM, Boles SM. Evaluating the public health impact of health promotion interventions:  
38 676 the RE-AIM framework. *Am J Public Health*. 1999;89(9):1322-7. doi:10.2105/ajph.89.9.1322.  
39  
40 677  
41 678 34. Sánchez A, Rogers HL, Pablo S, et al. Fidelity evaluation of the compared procedures for conducting  
42 679 the PVS-PREDIAPS implementation strategy to optimize diabetes prevention in primary care. *BMC Fam*  
43 680 *Pract*. 2021;22(1):34. Published 2021 Feb 11. doi:10.1186/s12875-021-01378-z.  
44  
45 681  
46 682 35. Glaser B, Strauss A. *The Discovery of Grounded Theory: Strategies for Qualitative Research*. Sociology  
47 683 Press; Chicago IL; 1967.  
48  
49 684  
50 685 36. Council for International Organizations of Medical Sciences (CIOMS) in collaboration with the World  
51 686 Health Organization (WHO). *International Ethical Guidelines for Biomedical Research Involving Human*  
52 687 *Subjects*. Geneva, Switzerland: Council for International Organizations of Medical Sciences (CIOMS); 2002.  
53  
54 688

## 689 **AUTHORS' CONTRIBUTIONS**

1  
2  
3 690 AS, JIP, and GG conceived the idea and are the study guarantors. They are primarily  
4  
5 691 responsible for the study design and planning, obtained funding, will be responsible for  
6  
7 692 project coordination and supervision, analysis and interpretation of results, and were  
8  
9 693 responsible for manuscript preparation. RSR, IL, RSV, JAQ, RR, AE, CM, MMC, MM,  
10  
11 694 CGR, RS, MOL, SC, NMI, ML, MGST, and AGA are co-investigators of the projects and  
12  
13 695 collaborated in the study design and/or manuscript preparation; and they will be  
14  
15 696 responsible for study coordination and interpretation of results. AS, JIP, and AGA will be  
16  
17 697 responsible for the analysis of results. All authors read and approved the final version of  
18  
19 698 the manuscript.  
20  
21  
22 699

## 700 **FUNDING STATEMENT**

701 This project has been funded by Instituto de Salud Carlos III (ISCIII), co-funded by the  
702 European Union (European Regional Development Fund “A way to make Europe”),  
703 through the projects: PI21/00025, RD16/0007/0002, and co-funded by the European  
704 Union – NextGenerationEU funds, that finance the actions of the Recovery and  
705 Resilience Facility (Mecanismo para la Recuperación y la Resiliencia -MRR), through  
706 the project RD21/0016/0003. This project has also been funded by the Health  
707 Department of the Basque Government (funded projects 2018111085 and 2021111024).  
708 The funding bodies have had no role in the design of the study, collection, analysis, or  
709 interpretation of data or the writing of the manuscript.  
710

## 711 **COMPETING INTERESTS STATEMENT**

712 The authors declare that they have no competing interests.  
713

## 714 **ACKNOWLEDGMENTS**

715 The authors would like to thank the following colleagues in the Basque Health Service  
716 (Osakidetza) for their support: Gaspar Lantarón Amas (Subdirectorate of Care

1  
2  
3 717 Integration) and Nagore Zarranonandia Ayo (Directorate of Care Integration) at  
4  
5 718 Ezkerraldea-Enkarterri-Cruces Integrated Health Organization, Lourdes Vivanco  
6  
7 719 (Medical Directorate) and Vanesa Martín (Quality Unit) at Barakaldo-Sestao Integrated  
8  
9 720 Health Organization.

10  
11 721

12  
13 **722 WORD COUNT**

14  
15 723 4353 words excluding title page, abstract, strengths and limitations of this study, list of  
16  
17 724 abbreviations, full references, authors' contributions, funding statement, competing  
18  
19 725 interests statement and acknowledgements.  
20  
21  
22  
23  
24  
25  
26  
27  
28  
29  
30  
31  
32  
33  
34  
35  
36  
37  
38  
39  
40  
41  
42  
43  
44  
45  
46  
47  
48  
49  
50  
51  
52  
53  
54  
55  
56  
57  
58  
59  
60

1  
2  
3  
4  
5  
6  
7  
8  
9  
10  
11  
12  
13  
14  
15  
16  
17  
18  
19  
20  
21  
22  
23  
24  
25  
26  
27  
28  
29  
30  
31  
32  
33  
34  
35  
36  
37  
38  
39  
40  
41  
42  
43  
44  
45  
46  
47  
48  
49  
50  
51  
52  
53  
54  
55  
56  
57  
58  
59  
60

726 **FIGURES**

727 **Figure 1. Study design diagram. (PDF format)**

728 Note: FP: Family Physician; IHO: Integrated Healthcare Organization; R: Randomization.

For peer review only



1  
2  
3 729 **SUPPLEMENTAL FILES**  
4

5 730 **Supplemental File 1 [DE-imFAR de-implementation strategies] (PDF format)**  
6

7  
8 731  
9  
10  
11  
12  
13  
14  
15  
16  
17  
18  
19  
20  
21  
22  
23  
24  
25  
26  
27  
28  
29  
30  
31  
32  
33  
34  
35  
36  
37  
38  
39  
40  
41  
42  
43  
44  
45  
46  
47  
48  
49  
50  
51  
52  
53  
54  
55  
56  
57  
58  
59  
60

For peer review only

1  
2  
3  
4  
5  
6  
7  
8  
9  
10  
11  
12  
13  
14  
15  
16  
17  
18  
19  
20  
21  
22  
23  
24  
25  
26  
27  
28  
29  
30  
31  
32  
33  
34  
35  
36  
37  
38  
39  
40  
41  
42  
43  
44  
45  
46  
47  
48  
49  
50  
51  
52  
53  
54  
55  
56  
57  
58  
59  
60

732 **Supplemental File 2 [DE-imFAR Phase II - Informed Consent Form for Family**  
733 **Physicians (Spanish)] (PDF format)**

734

For peer review only

1  
2  
3 735 **Supplemental File 3 [DE-imFAR Phase II - Informed Consent Form for Patients**  
4 **(Spanish)] (PDF format)**  
5  
6  
7  
8  
9  
10  
11  
12  
13  
14  
15  
16  
17  
18  
19  
20  
21  
22  
23  
24  
25  
26  
27  
28  
29  
30  
31  
32  
33  
34  
35  
36  
37  
38  
39  
40  
41  
42  
43  
44  
45  
46  
47  
48  
49  
50  
51  
52  
53  
54  
55  
56  
57  
58  
59  
60

For peer review only

# Experimental implementation trial with an additional control group

1  
2  
3  
4  
5  
6  
7  
8  
9  
10  
11  
12  
13  
14  
15  
16  
17  
18  
19  
20  
21  
22  
23  
24  
25  
26  
27  
28  
29  
30  
31  
32  
33  
34  
35  
36  
37  
38  
39  
40  
41



Change in the incidence of potentially inappropriate prescriptions and provision of lifestyle advice from baseline to 12 months after exposure of physicians to the compared strategies, in 40- to 74-year-old men and 45- to 74-year-old women with no history of statin use, with LDL-cholesterol levels between 70 and 189 mg/dl and/or Total Cholesterol between 200 and 289 mg/dl but without ischemic heart/cardiovascular disease and with an estimated cardiovascular risk <7.5% attending during the field-work period

**Outcome**

# The DE-imFAR de-implementation strategies

## 1. Strategy - *Non-reflective decision assistance strategy*

Support for clinical decision-making on the primary prevention of cardiovascular disease (CVD) in low cardiovascular risk (CVR) patients integrated into the electronic health record (EHR) of the Basque Health Service (Osakidetza), based on pop-up reminders and alerts, together with an interactive media-based algorithm stating the recommended practice and a patient information sheet.

### 1.1. Target audience

This strategy targets all family physicians (FPs) from all 13 Integrated Healthcare Organizations (IHOs) of the Basque Health Service (Osakidetza), both in primary and specialist or hospital care.

### 1.2. Active components (actions) of the intervention

- “Lighthouse” guiding alert in the REGICOR CVR calculator. Reminders of recommended clinical practice in the primary prevention of CVD that pop-up in the REGICOR CVR calculator when the CVR is estimated in patients aged between 35 and 74 years old. The alert varies depending on the CVR score (<10% or ≥10%).

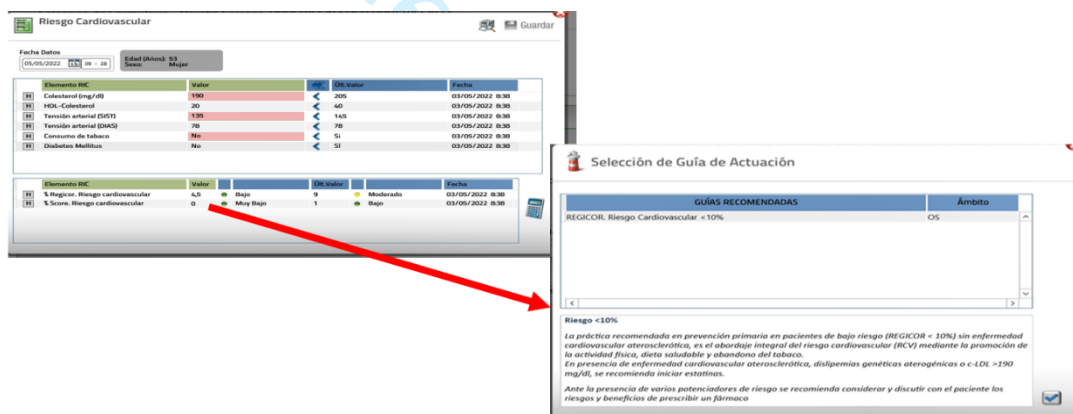

Figure 1. Pop-up reminder (“Lighthouse” guiding alert) in the REGICOR cardiovascular risk calculator when estimated cardiovascular risk score is <10%.

- Alerts in PRESBIDE. Pop-up reminders that appear when the PRESBIDE software is used to prescribe statins. There are three types of alerts depending on the patient’s age group (<35, 35-74, and ≥75 years old). Further, links are provided to a decision-making algorithm and a patient information sheet (i-botika).
- Decision-making algorithm: “Management of cholesterol as a risk factor in primary prevention of cardiovascular disease”. Clinical decision tree presenting potential courses of action based on clinical practice guidelines (CPGs), specifically for reducing cholesterol for the primary prevention of CVD in patients of different age groups and levels of CVR. Interactive decision-making support tool, developed by researchers collaborating in the DE-imFAR project, that also includes links for downloading two further documents: one providing information on CVD risk factors and the other on the 5As “Ask, Assess, Advise, Assist, Arrange” clinical intervention, recommended for promoting healthy lifestyles.

- Patient information sheet on cholesterol levels (i-botika: “Cholesterol levels are not the only thing”, developed in the framework of this project, providing information on high cholesterol levels and their role together with other risk factors associated with CVD)

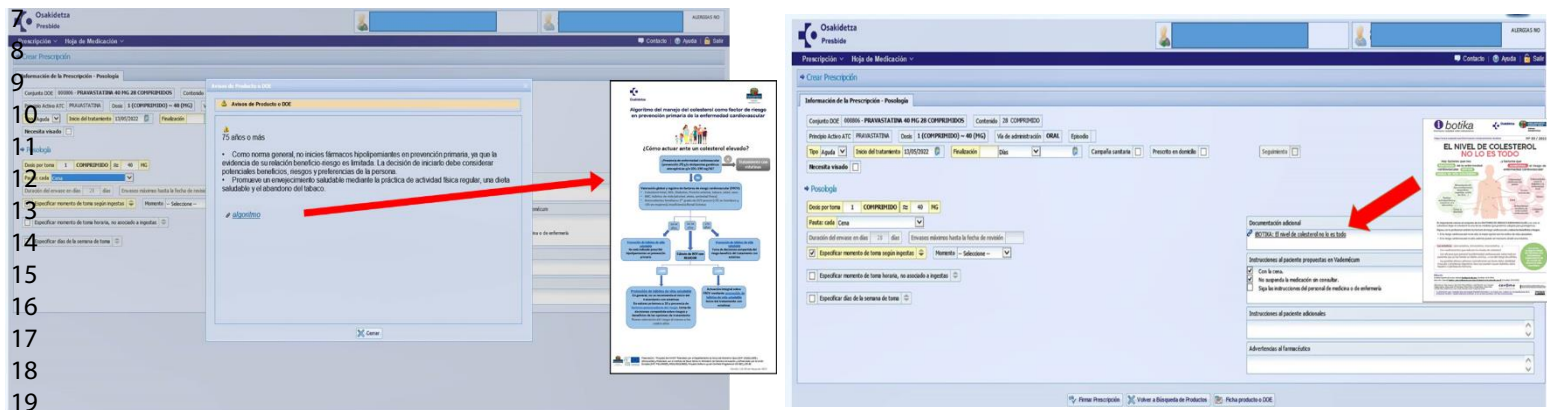

Figure 2. a). Pop-up reminder in the PRESBIDE software with recommendations on the prescribing of statins in people  $\geq 75$  years old that includes a link to the “Management of cholesterol as a risk factor in primary prevention of cardiovascular disease” algorithm, b) PRESBIDE form for prescribing statins, with a link to the patient information sheet (i-botika).

### 1.3. Objectives: *Determinant - What needs to change*

#### Pop-up alerts, reminders, and an algorithm

##### Cognitive and interpersonal skills:

- ✓ Enhance skills to enable appropriate prescribing of statins based on clinical practice recommendations

##### Attention, memory, and decision-making processes:

- ✓ Promote recall of recommended clinical practice in the primary prevention of CVD, reducing the impact of therapeutic inertia

##### Context and resources:

- ✓ Develop support systems in the EHR as reminders of and to promote the practices recommended in CPGs for the primary prevention of CVD (avoiding statins and encouraging healthy lifestyles)
- ✓ Restrict or impede inappropriate prescribing of statins due to clinical prescribing behavior driven by simplicity and speed

##### Emotion/Reinforcement:

- ✓ Reduce the likelihood of inappropriate prescribing due to habit, routine, or inertia (to “treat” cholesterol), through the experiencing of negative emotions when going against the recommended practice and this is made evident by alerts

#### **Patient information sheet**

##### Social influence (patient involvement):

- ✓ Increase patient awareness of the problems associated with the inappropriate prescribing of statins: risks vs benefits
- ✓ Increase patient knowledge of the criteria and courses of action recommended in CPGs (concerning cholesterol, CVD, and CVR)

## 1.4. Choice architecture techniques

### A. Decision Information

**A1. Translate information:** change the format or presentation of information but not the content.

**Reframe:** present the (same) information in several ways, e.g., Presenting the contents of CPGs in several different ways (i.e., text within alerts, in the form of an algorithm, etc.).

**Simplify:** reduce the burden of cognitive effort necessary to process the information available and increase its usefulness in the decision-making process, e.g., algorithm.

**A2. Make information visible:** make necessary information readily accessible.

**Make external information visible:** make decision-relevant information visible, e.g., text within alerts recalling the CPGs.

### B. Decision structure

#### B1. Change choice defaults

**Prompted choice:** avoid the status quo bias or default effects because of inertia or assumed recommendations, e.g., pop-up alerts.

**B2. Change option-related effort:** change physical effort.

**Increase physical effort:** e.g., pop-up alerts.

### C. Decision assistance

**C1. Provide reminders:** provide positive reminders that heighten the salience of a desired option and/or diminish the salience of an undesired option, e.g., Pop-up alerts with the recommendation to not prescribe statins.

## 1.5. Exposure

- “Lighthouse” guiding alert in the REGICOR CVR calculator: by clicking to “save” the result after estimating CVR
- Alerts in PRESBIDE: by starting to prescribe statins or clicking on the links to the algorithm or the patient information sheet

## 2. Strategy - Reflective/non-reflective decision information strategy

Corporate campaign entitled “Stopping low-value prescribing” (in Spanish: “*Abandono de prescripciones farmacológicas de escaso valor*”), promoted through a knowledge dissemination strategy based on circulars and notifications (e.g., mass mailing and internal newsletters) concerning content, informative material and documents on recommended clinical practice and improving the appropriateness and/or optimization in prescribing drug treatments, including that of statins for the primary prevention of CVD, made available to FPs on the corporate intranets of the Ezkerraldea-Enkarterri-Cruces (EEC) and Barakaldo-Sestao (BS) IHOs, part of the Basque Health Service (Osakidetza).

### 2.1. Target audience

This strategy targets all FPs from the EEC and BS IHOs, who will also be exposed to the first strategy, namely, non-reflective decision assistance.

### 2.2. Active components (actions) of the intervention

- Adherence to and implementation of best practice pages on the EEC and BS IHO intranets which have dedicated sections focused on improving the appropriateness of the use of statins providing easy access to the CPGs and recommended practice for the primary prevention of CVD.

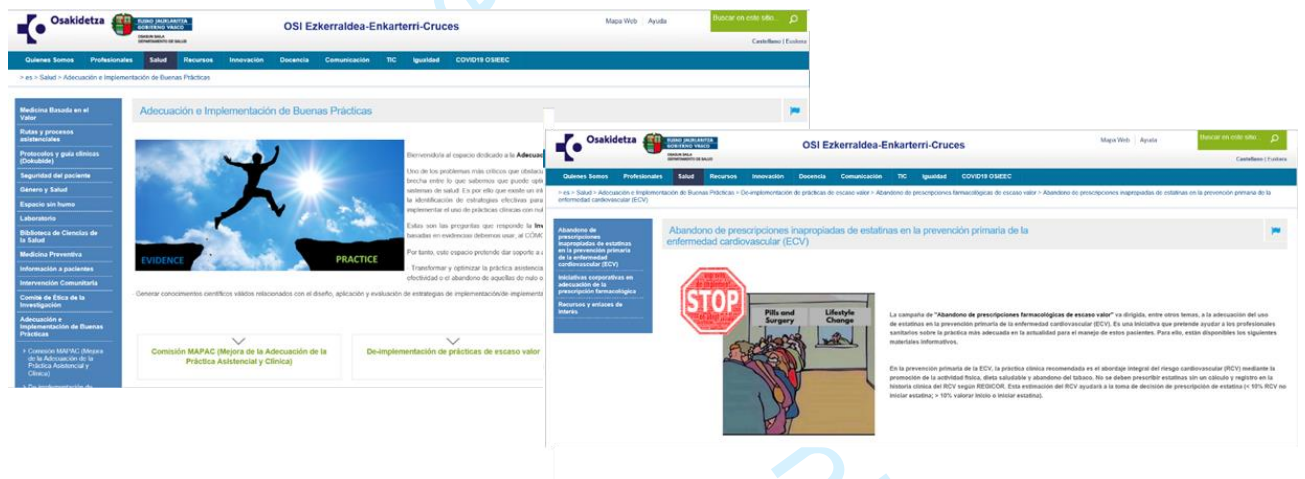

Figure 3. Main page of the adherence to and implementation of best practice (“*Adecuación e Implementación de Buenas Prácticas*”) section on the Ezkerraldea-Enkarterri-Cruces Integrated Healthcare Organization intranet and main page of the dedicated “Stopping inappropriate prescribing of statins for the primary prevention of cardiovascular disease” section. Equivalent pages were also created on the Barakaldo-Sestao Integrated Healthcare Organization intranet.

- Corporate dissemination campaign: activities aimed at attracting FPs to the pages created on the EEC and BS IHO intranets, in order that they access the information and documents available
  - News story on the launch of the campaign with links to the pages on the corporate intranets, e.g.,



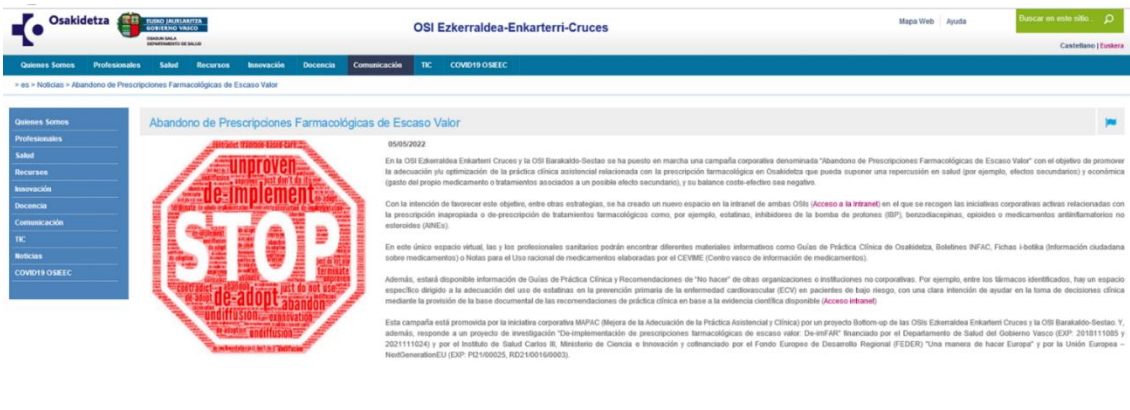

Figure 4. News story published on the Ezkerraldea-Enkarterri-Cruces Integrated Healthcare Organization intranet to announce the launch of the corporate “Stopping low-value prescribing” campaign and the development of pages on its intranet and that of the Barakaldo-Sestao Integrated Healthcare Organization, on May 5, 2022. The story was also published on the Barakaldo-Sestao Integrated Healthcare Organization intranet.

- **Monthly newsletter:** reporting of the launch of the campaign in the monthly newsletter circulated by the BS IHO to all its employees
- **Mass mailing** on the launch of the campaign with links to the pages on the corporate intranets
- **Revitalization of the corporate campaign:** periodic publication of news stories on the EEC and BS IHO intranets with content related to the campaign informing FPs of the updating of content/informative materials (for example, any changes in the recommendations in CPGs and INFAC [pharmacotherapy information] newsletters) on the dedicated pages on the intranets of both IHOs, aimed at improving the appropriateness of the use of statins in primary prevention of CVD, including links to these pages.
- **Justification email** from the Healthcare Management of the Basque Health Service, telling all FPs about the initiatives being put in place to improve the approach to the prevention of CVD, improving the appropriateness of statin prescribing, and encouraging the provision of healthy lifestyle advice, among other components.

### 2.3. Objectives: Determinant - *What needs to change*

#### Knowledge:

- ✓ Increase awareness of the problem of the inappropriate prescribing of statins
- ✓ Increase knowledge of the CPGs on the primary prevention of CVD, in particular, the appropriate or recommended care as a function of the estimated CVR
- ✓ Provide evidence-based standardized and up-to-date clinical guidelines

#### Behavior regulation:

- ✓ Encourage reflection on practice/performance in relation to inappropriate prescribing of statins in the primary prevention of CVD

#### Beliefs about capabilities:

- ✓ Strengthen the belief that the prescribing of statins is not as straightforward and safe as might be thought
- ✓ Strengthen the belief that statin treatment is not easy for patients (dosage)

Beliefs about consequences:

- ✓ Strengthen the belief that not prescribing statins for the primary prevention of CVD is not the same as “not treating”.
- ✓ Strengthen the belief that statins are not more effective in reducing cardiovascular events than healthy lifestyle promotion in the primary prevention of CVD
- ✓ Strengthen the belief that statins, in the primary prevention of CVD, may have adverse effects and are not risk-free.

Professional/social role and identity:

- ✓ Foster the belief that appropriate primary prevention of CVD is considered important at the organizational level and among peers.
- ✓ Strengthen understanding that the role of FPs goes beyond that of prescribing drugs.

Social influence:

- ✓ Increase awareness of the organizational goals for reducing inappropriate prescribing of statins in the primary prevention of CVD.
- ✓ Increase patient awareness of the problems associated with the inappropriate prescribing of statins: risks vs benefits
- ✓ Increase patient knowledge of the criteria and recommended courses of action (concerning cholesterol, CVD, and CVR)

Emotion/reinforcement:

- ✓ Reduce the likelihood of inappropriate prescribing due to habit, routine, or inertia (to “treat” cholesterol), through the experiencing of negative emotions when going against the recommended clinical practice and this is made evident by alerts.

Cognitive and interpersonal skills:

- ✓ Enhance skills to enable the appropriate prescribing of statins based on CPGs.

**2.4. Choice architecture techniques****A. Decision Information**

**A1. Translate Information:** change the format or presentation of information but not the content.

**Reframe:** present the (same) information in several ways, e.g., clinical guidelines, algorithm, patient information leaflet.

**Simplify:** reduce the burden of cognitive effort necessary to process the information available and increase its usefulness in the decision-making process, e.g., algorithm.

**A2. Make information visible:** make necessary information readily accessible.

**Make external information visible:** make decision-relevant information visible, e.g., Links about inappropriate statin prescription in the Basque Health Service (Osakidetza), adverse effects of statins and cholesterol treatment, and promotion of the campaign through emails and news.

**A3. Provide social reference point:** influence decision-making through other’s behavior.

**Refer to descriptive norm:** depict the observable behavior of other people to impact on the decision-making process, e.g., links about inappropriate statin prescription in the Basque Health Service (Osakidetza).

**Refer to opinion leader:** use them as information disseminators to improve the impact of the campaign, e.g., Setting of goals in an email sent by an opinion leader, using the source as much as the content of the message to improve the impact of the campaign.

**B. Decision structure**

**B2. Change option-related effort:** modify the physical or financial effort involved in the decision-making process.

**Change physical effort,** e.g., decreasing physical effort by making all theme-related information accessible on the same website and including links to the website in the text of emails and news stories.

### C. Decision assistance

**C1. Provide reminders:** provide positive reminders that heighten the salience of a desired option and/or diminish the salience of an undesired option, e.g., links to clinical guidelines with recommended practice about CVD primary prevention, and information about adverse effects of statins.

### 2.5. Exposure

- By accessing the pages of the EEC and BS IHO corporate intranet and clicking on the links to the CPGs, INFAC newsletters, i-botika patient information sheets, recommendations, etc. available in the dedicated “Stopping inappropriate prescribing of statins for the primary prevention of cardiovascular disease” section
- By accessing the news section on the dedicated pages on the intranets of EEC and BS IHOs

### 3. Strategy - Reflective decision structure strategy

Sending of regular personalized *Audit & Feedback (A&F)* reports with practice- and organizational-level performance indicators of the FPs regarding inappropriate prescribing of statins and healthy lifestyle promotion in the primary prevention of CVD in low-risk patients in the Basque Health Service

#### 3.1. Target audience

This strategy targets a randomly selected set of FPs from the EEC and BS IHOs, who will also be exposed to the previously described interventions, namely, *non-reflective decision assistance and decision information*.

#### 3.2. Active components (actions) of the intervention

- Informative email concerning the sending of A&F reports, including the possibility to opt out: email with information for primary care FPs of the EEC and BS IHOs on the sending of regular personalized A&F reports, in the framework of the corporate campaign, with the goal of encouraging adherence to recommendations and stopping inappropriate prescribing of statins
- A&F reports mailing: periodic A&F reports with indicators describing global performance across the Basque Health Service: a) rate of new potentially inappropriate prescribing of statins to people without CVD and with REGICOR CVR scores <7.5% and practice in the promotion of healthy habits in these patients; b) rate of documentation of CVR (in the 2 years before the prescription date) in all 40- to 75-year-olds with no clinical history of CVR who are newly prescribed statins. Future A&F reports are expected to contain a link to a short voluntary exercise on goal setting for improving the appropriateness of statin prescribing for the primary prevention of CVD

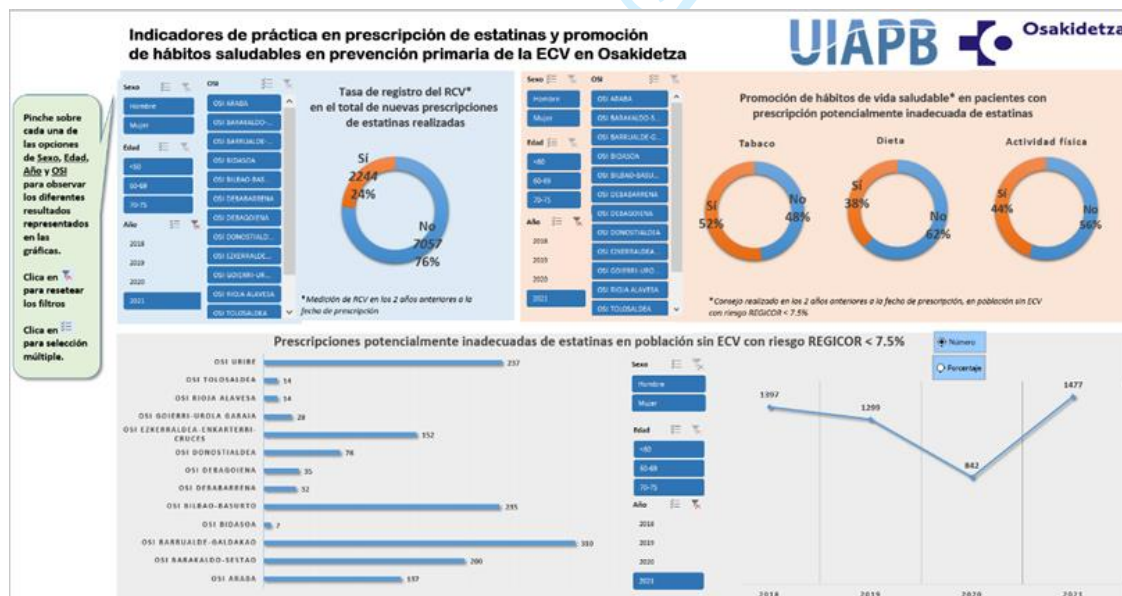

Figure 5. Draft of the Audit & Feedback report with practice- and organizational-level performance indicators of the family physicians regarding inappropriate prescribing of statins and healthy lifestyle promotion in the primary prevention of cardiovascular disease in low-risk patients in the Basque Health Service

### 3.3. Objectives: Determinant - What needs to change

#### Knowledge:

- ✓ Increase awareness of the problem of the inappropriate prescribing of statins

#### Behavior regulation:

- ✓ Make data available on inappropriate prescribing of statins for the primary prevention of CVD
- ✓ Provide tools for the setting of clear specific goals, at personal and organizational levels, regarding the reduction of inappropriate prescribing of statins for the primary prevention of CVD

#### Active reflection on personal practice:

- ✓ Encourage further reflection on practice/performance in relation to inappropriate prescribing of statins for the primary prevention of CVD

#### Intentions:

- ✓ Reduce the intention to prescribe statins inappropriately and increase the intention to promote healthy lifestyles for the primary prevention of CVD

#### Goals:

- ✓ Encourage commitment to practice in the primary prevention of CVD that is in accordance with recommendations
- ✓ Increase the motivation to promote healthy lifestyles in the primary prevention of CVD

#### Beliefs about capabilities:

- ✓ Strengthen self-efficacy and enhance the skills required for promoting healthy lifestyles

#### Emotion:

- ✓ Strengthen self-confidence about not prescribing statins for the primary prevention of CVD
- ✓ Foster belief in the safety of and trust in the courses of action recommended in the guidelines
- ✓ Experience a negative emotion after inappropriate prescribing

#### Professional/social role and identity:

- ✓ Foster the belief that appropriate primary prevention of CVD is considered important at the organizational level and among peers
- ✓ Strengthen understanding that the role of FPs goes beyond prescribing drugs

#### Reinforcement:

- ✓ Generate positive/negative reinforcement related to good/poor performance in the primary prevention of CVD.

### 3.4. Choice architecture techniques

#### **A. Decision Information**

**A1. Translate Information:** change the format or presentation of information but not the content.

**Simplify:** reduce the burden of cognitive effort necessary to process the information available and increase its usefulness in the decision-making process, e.g., presenting prescription rate data in a simple, user-friendly way, namely, on a dashboard.

**A2. Make information visible:** make necessary information readily accessible.

**Make own behavior visible:** feedback.

**Make external information visible:** make decision-relevant information visible, e.g., showing the prescription rates of other FPs and other IHOs.

**A3. Provide social reference point:** influence decision-making through the behavior of others.

**Refer to descriptive norm:** depict the observable behavior of other people to impact on the decision-making process, e.g., showing other FPs' prescribing behavior.

1  
2  
3  
4 **B. Decision structure**

5 **B2. Change opinion-related effort:** modify the physical or financial effort involved in the  
6 decision-making process.

7 **Decrease physical effort:** collect all prescribing data in one file, e.g., dashboard.  
8

9  
10 **C. Decision assistance**

11 **C2. Facilitate commitment:** overcome constrained self-control and bridge the intention-  
12 behavior gap.

13 **Support self-commitment:** arrange with the aim of helping fulfill a plan, e.g., self-commitment  
14 questionnaire  
15

16  
17 **3.5. Exposure**

18 By opening the A&F reports received by email.  
19  
20  
21  
22  
23  
24  
25  
26  
27  
28  
29  
30  
31  
32  
33  
34  
35  
36  
37  
38  
39  
40  
41  
42  
43  
44  
45  
46  
47  
48  
49  
50  
51  
52  
53  
54  
55  
56  
57  
58  
59  
60

## Annex I. GLOSSARY OF TERMS

**1. De-implementation:** De-implementation is defined as the process of reducing or abandoning the use of guidelines practices, interventions or policies that are found to be ineffective, are not proven to be effective, do not have adequate scientific support, are less effective or less cost-effective than an alternative one, are potentially harmful to patients, or that represent low-value care.

**2. Implementation:** Implementation (commonly defined as “to do”), in the context of Implementation Science refers to the actively designed process of putting into practice or integrating evidence-based interventions (e.g., practice, program, policy,...) within a specific real-world setting.

**3. Theoretical Domains Framework (TDF):** The Theoretical Domains Framework (TDF) is an integrative framework developed from a synthesis of psychological theories as a vehicle to help apply theoretical approaches to interventions aimed at behavior change. The TDF comprises of 14 domains and 84 constructs that allows synthesis of a multitude of coherent behavior change theories into a single framework that allows assessment and explanation of behavioral problems and associated barriers and enablers, and inform the design of appropriately targeted interventions.

References:

1. Michie S, Johnston M, Abraham C, et al. Making psychological theory useful for implementing evidence based practice: a consensus approach. *Qual Saf Health Care*. 2005;14(1):26-33. doi:10.1136/qshc.2004.011155.
2. Cane J, O'Connor D, Michie S. Validation of the theoretical domains framework for use in behaviour change and implementation research. *Implement Sci*. 2012;7:37. doi:10.1186/1748-5908-7-37.
3. Atkins L, Francis J, Islam R, et al. A guide to using the Theoretical Domains Framework of behaviour change to investigate implementation problems. *Implement Sci*. 2017;12(1):77. doi: 10.1186/s13012-017-0605-9.

**4. Behavior Change Wheel (BCW):** The Behavior Change Wheel (BCW) is a theory- and evidence-based tool that provides a process for designing or refining behavior change interventions and policies. Its purpose is to promote a systematic and comprehensive analysis of behavior in its context to guide change. It can be used to identify the interventions and policies likely to be effective in changing behavior.

Reference:

1. Michie S, van Stralen MM, West R. The behaviour change wheel: a new method for characterising and designing behaviour change interventions. *Implement Sci*. 2011 23;6:42. Published 2011 Apr 23. doi:10.1186/1748-5908-6-42.

**5. Statin:** Statins, also known as HMG-CoA reductase inhibitors, are a class of lipid-lowering medications that are used to lower blood low-density lipoprotein (LDL) cholesterol levels.

**6. Non-reflective:** Non-reflective processes, such as habits and routines, are defined as those factors that bypass conscious deliberation and so generate actions fast, effortlessly, automatically and with little deliberation and awareness.

**7. Reflective:** Reflective processes involves conscious deliberation over situational demands, available options and/or outcome expectancies; and therefore generate slow and effortful actions or behaviors via reasoned intentions.

## 8. Decision assistance strategy. Decision information strategy. Decision structure strategy

According to the taxonomy suggested by Münscher et al., there are three broad categories of choice architecture intervention techniques: decision information, decision structure, and decision assistance (Münscher et al., 2016).

- i) **Decision information** interventions aim to facilitate access to decision-relevant information without altering the options themselves by increasing its availability, comprehensibility, and/or personal relevance to the decision maker. There are several ways of achieving it, such as (re)arranging existing information or changing its presentation/format, providing social reference point, etc.
- ii) **Decision structure** interventions target the way in which the choice options are organized and structured through the arrangement of choice alternatives and the format of decision making, which includes setting default options, rearranging their composition, and changing option-related efforts or consequences of selecting it.
- iii) **Decision assistance** interventions aim to bridge the intention–behavior gap by reinforcing self-regulation by providing decision makers with further assistance to help them follow through with their intentions. To do so, examples of decision assistance interventions techniques include provision of reminders of the desirable behavioral option as well as facilitating deliberate commitment to beneficial actions.

### References:

1. Münscher R, Vetter M, Scheuerle T. A review and taxonomy of choice architecture techniques. *J Behav Decis Mak.* 2016;29(5):511-24. doi.org/10.1002/bdm.1897.
2. Mertens S, Herberz M, Hahnel UJJ, Brosch T. The effectiveness of nudging: A meta-analysis of choice architecture interventions across behavioral domains. *Proc Natl Acad Sci USA.* 2022;119(1):e2107346118. doi: 10.1073/pnas.2107346118. Erratum in: *Proc Natl Acad Sci USA.* 2022;119(19):e2204059119.

**9. Audit & feedback (A&F):** Audit and feedback is a strategy that aims to encourage individuals to change their practice and improve their performance. In the audit process, an individual's professional practice or performance is assessed and monitored based on specific, pre-defined criteria or standards. Then, the results of the comparison is fed back to the individual in a structured manner.



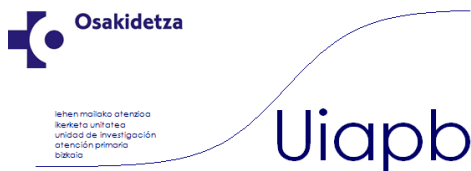

## ***Hoja de Información al Profesional de la salud y Consentimiento Informado***

**Título:** Efectividad de estrategias de de-implementación para favorecer el abandono de prescripciones farmacológicas de bajo valor en prevención primaria de la ECV: proyecto De-imFAR Fase II

**Investigador Principal:** Álvaro Sánchez Pérez

**Servicio/Centro:** Subdirección para la coordinación de atención primaria/Unidad de investigación atención primaria-IIS Biocruces Bizkaia

**Entidad financiadora:** Instituto de salud Carlos III

Apreciado Sr./a,

Osakidetza-Servicio Vasco de Salud, con el propósito de mejorar la calidad en la prestación de servicios de salud hacia la ciudadanía, le invita a participar en el estudio “Efectividad de estrategias de de-implementación para favorecer el abandono de prescripciones farmacológicas de bajo valor en prevención primaria de la ECV: proyecto De-imFAR Fase II”.

Antes de decidir si desea participar, es importante que entienda los objetivos, la importancia de su participación y en qué consistirá, además de qué uso se dará a los datos recogidos y los posibles beneficios y riesgos.

Léalo atentamente y consulte cualquier duda con los miembros del equipo de investigación.

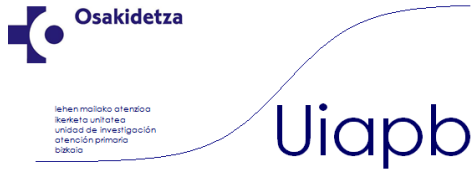

## 1. OBJETO DEL GRUPO DE DISCUSIÓN

El objetivo de los grupos de discusión del Proyecto De-ImFAR es generar conocimiento –a través de las percepciones de los/las profesionales de medicina de atención primaria- sobre la práctica clínica en prevención primaria de eventos cardiovasculares en pacientes de bajo riesgo. A través de una serie de preguntas abiertas se analizarán diferentes aspectos relacionados con el manejo del riesgo cardiovascular en estos pacientes, tratando de conocer la opinión de todos los integrantes del grupo sobre este tema.

No existen respuestas buenas o malas. Cualquier integrante del grupo está invitado a expresar libremente su opinión y a respetar la de los otros integrantes, aunque sea diferente de la suya.

## 2. PARTICIPACIÓN Y RETIRADA DEL ESTUDIO

Este estudio está aprobado por el Comité de Ética de la Investigación con Medicamentos de Euskadi (CEIm-E). Su participación en el mismo es voluntaria y en cualquier momento puede decidir abandonarlo, aunque haya proporcionado el consentimiento y el estudio esté en pleno desarrollo. Además, usted tiene derecho a solicitar al equipo investigador del estudio, en cualquier momento, y sin necesidad de especificar el motivo, la eliminación de sus datos.

## 3. DESARROLLO DEL ESTUDIO

Se realizará una sola entrevista llevada a cabo por dos investigadores con experiencia en métodos de investigación cualitativa, así como en el campo clínico y el proyecto. En dicha entrevista se le harán preguntas sobre su percepción y adaptación a las intervenciones implantadas. La discusión grupal será grabada (en formato audio) con el fin de transcribirla íntegramente. Esto permite a los miembros del equipo participar en la discusión sin necesidad de tomar notas, evitándose así el riesgo de no reflejar fidedignamente las opiniones expresadas por los miembros del grupo.



#### 4. USO Y CONFIDENCIALIDAD DE LOS DATOS

Los datos que se obtengan en el grupo de discusión se utilizarán únicamente con fines de investigación y solamente por parte del equipo de investigación de la Unidad de Investigación de Atención Primaria de Bizkaia (UIAPB). Todas las opiniones expresadas por los/las participantes serán tratadas de manera anónima y confidencial. Se le informa de que no se va a recoger ningún dato de carácter personal.

El estudio cumple lo establecido en el REGLAMENTO (UE) 2016/679 DEL PARLAMENTO EUROPEO Y DEL CONSEJO de 27 de abril de 2016 relativo a la protección de las personas físicas en lo que respecta al tratamiento de datos personales y a la libre circulación de estos datos. Se le solicita también su consentimiento para la realización de este proyecto de investigación conforme a las exigencias del Reglamento Europeo 2016/679 de Protección de Datos y a la Ley Orgánica 3/2018, de 5 de diciembre, de Protección de Datos Personales y garantía de los derechos digitales que deroga la Ley Orgánica 15/1999, de 5 de diciembre, de protección de datos personales. No se cederán datos a terceros, salvo obligación legal.

Para contactar con los responsables del estudio puede dirigirse a:

**Nombre:** Álvaro Sánchez Pérez

**Teléfono:** 946006673

**e-mail:** [alvaro.sanchezperez@osakidetza.eus](mailto:alvaro.sanchezperez@osakidetza.eus)

**Dirección:** Edificio Biocruces 3, Plaza Cruces 12, 48903

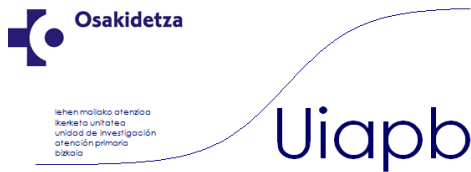

5. DECLARACION DEL CONSENTIMIENTO INFORMADO

Título: Efectividad de estrategias de de-implementación para favorecer el abandono de prescripciones farmacológicas de bajo valor en prevención primaria de la ECV: proyecto De-imFAR Fase II

Investigador Principal: Álvaro Sánchez Pérez

Servicio/Centro: Subdirección para la coordinación de atención primaria/Unidad de investigación atención primaria-IIS Biocruces Bizkaia

Yo, Don/Doña....., Médico/a de Atención Primaria del Centro de Salud....., he leído este documento, he comprendido las explicaciones en él facilitadas acerca de la grabación del grupo de discusión y he podido resolver todas las preguntas que he planteado al respecto. Comprendo que mi participación en este ensayo es voluntaria y que puedo retirarme en cualquier momento.

También he sido informado/a de que mis datos personales serán protegidos y serán utilizados únicamente con fines de investigación por el equipo de investigadores de la Unidad de Investigación de Atención Primaria de Bizkaia (UIAPB).

Tomando todo ello en consideración y en tales condiciones, CONSIENTO participar en el grupo de discusión, en la grabación del mismo y en que los datos que se deriven de mi participación sean utilizados para cubrir los objetivos especificados en el documento.

EN CONSECUENCIA, DOY MI CONSENTIMIENTO PARA PARTICIPAR EN ESTE PROYECTO DE INVESTIGACIÓN.

..... Firma del/la médico Firma del/la responsable del proyecto

..... Nombre y apellidos Nombre y apellidos

Fecha ...../...../20..... Fecha ...../...../20.....

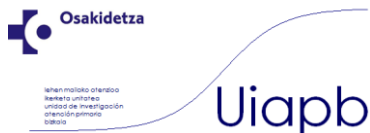

## ***Hoja de Información al Paciente y Consentimiento Informado***

**Título:** Efectividad de estrategias de de-implementación para favorecer el abandono de prescripciones farmacológicas de bajo valor en prevención primaria de la ECV: proyecto De-imFAR Fase II

**Investigador Principal:** Álvaro Sánchez Pérez

**Servicio/Centro:** Subdirección para la coordinación de atención primaria/Unidad de investigación atención primaria-IIS Biocruces Bizkaia

**Entidad financiadora:** Instituto de salud Carlos III

Apreciado Sr./a,

Osakidetza-Servicio Vasco de Salud, con el propósito de mejorar la calidad en la prestación de servicios de salud hacia la ciudadanía, le invita a participar en el estudio “Efectividad de estrategias de de-implementación para favorecer el abandono de prescripciones farmacológicas de bajo valor en prevención primaria de la ECV: proyecto De-imFAR Fase II”.

Antes de decidir si desea participar, es importante que entienda los objetivos, la importancia de su participación y en qué consistirá, además de qué uso se dará a los datos recogidos y los posibles beneficios y riesgos.

Léalo atentamente y consulte cualquier duda con los miembros del equipo de investigación.

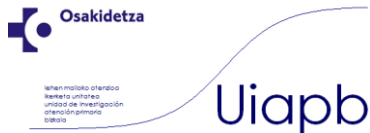

## 1. OBJETO DEL GRUPO DE DISCUSIÓN

El objetivo de los grupos de discusión del Proyecto De-ImFAR es generar conocimiento –a través de las percepciones de los/las pacientes de atención primaria- sobre la práctica clínica en prevención primaria de eventos cardiovasculares en pacientes de bajo riesgo. A través de una serie de preguntas abiertas se analizarán diferentes aspectos relacionados con la experiencia percibida por los/las pacientes con la atención recibida, tratando de conocer la opinión de todos los integrantes del grupo sobre este tema.

No existen respuestas buenas o malas. Cualquier integrante del grupo está invitado a expresar libremente su opinión y a respetar la de los otros integrantes, aunque sea diferente de la suya.

## 2. PARTICIPACIÓN Y RETIRADA DEL ESTUDIO

Este estudio está aprobado por el Comité de Ética de la Investigación con Medicamentos de Euskadi (CEIm-E). Su participación en el mismo es voluntaria y en cualquier momento puede decidir abandonarlo, aunque haya proporcionado el consentimiento y el estudio esté en pleno desarrollo. Su decisión no afectará la atención sanitaria que reciba posteriormente. Además, usted tiene derecho a solicitar al equipo investigador del estudio, en cualquier momento, y sin necesidad de especificar el motivo, la eliminación de sus datos. Su participación en este estudio no supondrá para usted ningún coste económico, así como tampoco será recompensado económicamente por ello.

## 3. DESARROLLO DEL ESTUDIO

Se realizará una sola entrevista llevada a cabo por dos investigadores con experiencia en métodos de investigación cualitativa, así como en el campo clínico y el proyecto. En dicha entrevista se le harán preguntas sobre su experiencia y satisfacción con el servicio recibido en prevención primaria de eventos cardiovasculares.

La discusión grupal será grabada (en formato audio) con el fin de transcribirla íntegramente. Esto permite a los miembros del equipo participar en la discusión sin necesidad de tomar notas, evitándose así el riesgo de no reflejar fidedignamente las opiniones expresada por los miembros del grupo.



#### 4. USO Y CONFIDENCIALIDAD DE LOS DATOS

Los datos que se obtengan en el grupo de discusión se utilizarán únicamente con fines de investigación y solamente por parte del equipo de investigación de la Unidad de Investigación de Atención Primaria de Bizkaia (UIAPB). Todas las opiniones expresadas por los/las participantes serán tratadas de manera anónima y confidencial. Se le informa de que no se va a recoger ningún dato de carácter personal.

El estudio cumple lo establecido en el REGLAMENTO (UE) 2016/679 DEL PARLAMENTO EUROPEO Y DEL CONSEJO de 27 de abril de 2016 relativo a la protección de las personas físicas en lo que respecta al tratamiento de datos personales y a la libre circulación de estos datos. Se le solicita también su consentimiento para la realización de este proyecto de investigación conforme a las exigencias del Reglamento Europeo 2016/679 de Protección de Datos y a la Ley Orgánica 3/2018, de 5 de diciembre, de Protección de Datos Personales y garantía de los derechos digitales que deroga la Ley Orgánica 15/1999, de 5 de diciembre, de protección de datos personales. No se cederán datos a terceros, salvo obligación legal.

Si usted tiene alguna duda o requiere cualquier tipo de información no dude en contactar con el/la médico que le informa, Dr./a \_\_\_\_\_, cuyo lugar de trabajo es el Servicio de \_\_\_\_\_ del Hospital Universitario \_\_\_\_\_; teléfono: \_\_\_\_\_ (extensión \_\_\_\_\_).

Usted también puede contactar con el Investigador Principal responsable:

**Nombre:** Álvaro Sánchez Pérez

**Teléfono:** 946006673

**e-mail:** [alvaro.sanchezperez@osakidetza.eus](mailto:alvaro.sanchezperez@osakidetza.eus)

**Dirección:** Edificio Biocruces 3, Plaza Cruces 12, 48903

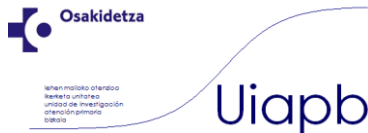

## 5. DECLARACION DEL CONSENTIMIENTO INFORMADO

**Título:** Efectividad de estrategias de de-implementación para favorecer el abandono de prescripciones farmacológicas de bajo valor en prevención primaria de la ECV: proyecto De-imFAR Fase II

**Investigador Principal:** Álvaro Sánchez Pérez

Investigador/a médico/a:.....

**Servicio/Centro:** Subdirección para la coordinación de atención primaria/Unidad de investigación atención primaria-IIS Biocruces Bizkaia

Yo, Don/Doña.....(nombre y apellidos del paciente),

he leído este documento, he comprendido las explicaciones en él facilitadas acerca de la grabación del grupo de discusión y he podido resolver todas las preguntas que he planteado al respecto. Comprendo que mi participación en este ensayo es voluntaria y que puedo retirarme en cualquier momento.

También he sido informado/a de que mis datos personales serán protegidos y serán utilizados únicamente con fines de investigación por el equipo de investigadores de la Unidad de Investigación de Atención Primaria de Bizkaia (UIAPB).

Tomando todo ello en consideración y en tales condiciones, CONSIENTO participar en el grupo de discusión, en la grabación del mismo y en que los datos que se deriven de mi participación sean utilizados para cubrir los objetivos especificados en el documento.

**EN CONSECUENCIA, DOY MI CONSENTIMIENTO PARA PARTICIPAR EN ESTE PROYECTO DE INVESTIGACIÓN.**

.....

Firma del/la paciente

.....

Firma del/la médico responsable

.....

Nombre y apellidos

.....

Nombre y apellidos

Fecha ...../...../20.....

Fecha ...../...../20.....



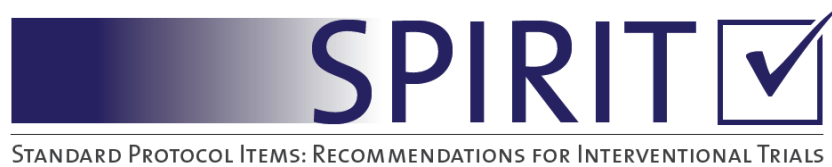

SPIRIT 2013 Checklist: Recommended items to address in a clinical trial protocol and related documents\*

| Section/item                      | Item No | Description                                                                                                                                                                                                                                                                              | Addressed on page number |
|-----------------------------------|---------|------------------------------------------------------------------------------------------------------------------------------------------------------------------------------------------------------------------------------------------------------------------------------------------|--------------------------|
| <b>Administrative information</b> |         |                                                                                                                                                                                                                                                                                          |                          |
| Title                             | 1       | Descriptive title identifying the study design, population, interventions, and, if applicable, trial acronym                                                                                                                                                                             | 1                        |
| Trial registration                | 2a      | Trial identifier and registry name. If not yet registered, name of intended registry                                                                                                                                                                                                     | 4                        |
|                                   | 2b      | All items from the World Health Organization Trial Registration Data Set                                                                                                                                                                                                                 | N/A                      |
| Protocol version                  | 3       | Date and version identifier                                                                                                                                                                                                                                                              | 19                       |
| Funding                           | 4       | Sources and types of financial, material, and other support                                                                                                                                                                                                                              | 24                       |
| Roles and responsibilities        | 5a      | Names, affiliations, and roles of protocol contributors                                                                                                                                                                                                                                  | 1-2                      |
|                                   | 5b      | Name and contact information for the trial sponsor                                                                                                                                                                                                                                       | 2                        |
|                                   | 5c      | Role of study sponsor and funders, if any, in study design; collection, management, analysis, and interpretation of data; writing of the report; and the decision to submit the report for publication, including whether they will have ultimate authority over any of these activities | 24                       |
|                                   | 5d      | Composition, roles, and responsibilities of the coordinating centre, steering committee, endpoint adjudication committee, data management team, and other individuals or groups overseeing the trial, if applicable (see Item 21a for data monitoring committee)                         | N/A                      |
| <b>Introduction</b>               |         |                                                                                                                                                                                                                                                                                          |                          |
| Background and rationale          | 6a      | Description of research question and justification for undertaking the trial, including summary of relevant studies (published and unpublished) examining benefits and harms for each intervention                                                                                       | 5-7                      |
|                                   | 6b      | Explanation for choice of comparators                                                                                                                                                                                                                                                    | 7-8                      |
| Objectives                        | 7       | Specific objectives or hypotheses                                                                                                                                                                                                                                                        | 8-9                      |
| Trial design                      | 8       | Description of trial design including type of trial (eg, parallel group, crossover, factorial, single group), allocation ratio, and framework (eg, superiority, equivalence, noninferiority, exploratory)                                                                                | 9, 12-13                 |

## Methods: Participants, interventions, and outcomes

|                      |     |                                                                                                                                                                                                                                                                                                                                                                                |       |
|----------------------|-----|--------------------------------------------------------------------------------------------------------------------------------------------------------------------------------------------------------------------------------------------------------------------------------------------------------------------------------------------------------------------------------|-------|
| Study setting        | 9   | Description of study settings (eg, community clinic, academic hospital) and list of countries where data will be collected. Reference to where list of study sites can be obtained                                                                                                                                                                                             | 10    |
| Eligibility criteria | 10  | Inclusion and exclusion criteria for participants. If applicable, eligibility criteria for study centres and individuals who will perform the interventions (eg, surgeons, psychotherapists)                                                                                                                                                                                   | 10    |
| Interventions        | 11a | Interventions for each group with sufficient detail to allow replication, including how and when they will be administered                                                                                                                                                                                                                                                     | 12    |
|                      | 11b | Criteria for discontinuing or modifying allocated interventions for a given trial participant (eg, drug dose change in response to harms, participant request, or improving/worsening disease)                                                                                                                                                                                 | N/A   |
|                      | 11c | Strategies to improve adherence to intervention protocols, and any procedures for monitoring adherence (eg, drug tablet return, laboratory tests)                                                                                                                                                                                                                              | N/A   |
|                      | 11d | Relevant concomitant care and interventions that are permitted or prohibited during the trial                                                                                                                                                                                                                                                                                  | N/A   |
| Outcomes             | 12  | Primary, secondary, and other outcomes, including the specific measurement variable (eg, systolic blood pressure), analysis metric (eg, change from baseline, final value, time to event), method of aggregation (eg, median, proportion), and time point for each outcome. Explanation of the clinical relevance of chosen efficacy and harm outcomes is strongly recommended | 13-15 |
| Participant timeline | 13  | Time schedule of enrolment, interventions (including any run-ins and washouts), assessments, and visits for participants. A schematic diagram is highly recommended (see Figure)                                                                                                                                                                                               | N/A   |
| Sample size          | 14  | Estimated number of participants needed to achieve study objectives and how it was determined, including clinical and statistical assumptions supporting any sample size calculations                                                                                                                                                                                          | 17    |
| Recruitment          | 15  | Strategies for achieving adequate participant enrolment to reach target sample size                                                                                                                                                                                                                                                                                            | N/A   |

## Methods: Assignment of interventions (for controlled trials)

### Allocation:

|                     |     |                                                                                                                                                                                                                                                                                                                                                          |    |
|---------------------|-----|----------------------------------------------------------------------------------------------------------------------------------------------------------------------------------------------------------------------------------------------------------------------------------------------------------------------------------------------------------|----|
| Sequence generation | 16a | Method of generating the allocation sequence (eg, computer-generated random numbers), and list of any factors for stratification. To reduce predictability of a random sequence, details of any planned restriction (eg, blocking) should be provided in a separate document that is unavailable to those who enrol participants or assign interventions | 13 |
|---------------------|-----|----------------------------------------------------------------------------------------------------------------------------------------------------------------------------------------------------------------------------------------------------------------------------------------------------------------------------------------------------------|----|

|    |                                                           |     |                                                                          |       |
|----|-----------------------------------------------------------|-----|--------------------------------------------------------------------------|-------|
| 1  | Allocation                                                |     | Mechanism of implementing the allocation sequence (eg, central           |       |
| 2  | concealment                                               | 16b | telephone; sequentially numbered, opaque, sealed envelopes),             | 13    |
| 3  | mechanism                                                 |     | describing any steps to conceal the sequence until interventions are     |       |
| 4  |                                                           |     | assigned                                                                 |       |
| 5  |                                                           |     |                                                                          |       |
| 6  | Implementati                                              | 16c | Who will generate the allocation sequence, who will enrol                | 13    |
| 7  | on                                                        |     | participants, and who will assign participants to interventions          |       |
| 8  |                                                           |     |                                                                          |       |
| 9  | Blinding                                                  |     | Who will be blinded after assignment to interventions (eg, trial         |       |
| 10 | (masking)                                                 | 17a | participants, care providers, outcome assessors, data analysts), and     | 13    |
| 11 |                                                           |     | how                                                                      |       |
| 12 |                                                           |     |                                                                          |       |
| 13 |                                                           |     |                                                                          |       |
| 14 |                                                           | 17b | If blinded, circumstances under which unblinding is permissible, and     |       |
| 15 |                                                           |     | procedure for revealing a participant's allocated intervention during    | N/A   |
| 16 |                                                           |     | the trial                                                                |       |
| 17 |                                                           |     |                                                                          |       |
| 18 |                                                           |     |                                                                          |       |
| 19 | <b>Methods: Data collection, management, and analysis</b> |     |                                                                          |       |
| 20 |                                                           |     |                                                                          |       |
| 21 | Data collection                                           |     | Plans for assessment and collection of outcome, baseline, and            |       |
| 22 | methods                                                   | 18a | other trial data, including any related processes to promote data        | 18    |
| 23 |                                                           |     | quality (eg, duplicate measurements, training of assessors) and a        |       |
| 24 |                                                           |     | description of study instruments (eg, questionnaires, laboratory         |       |
| 25 |                                                           |     | tests) along with their reliability and validity, if known. Reference to |       |
| 26 |                                                           |     | where data collection forms can be found, if not in the protocol         |       |
| 27 |                                                           |     |                                                                          |       |
| 28 |                                                           |     |                                                                          |       |
| 29 |                                                           | 18b | Plans to promote participant retention and complete follow-up,           | N/A   |
| 30 |                                                           |     | including list of any outcome data to be collected for participants      |       |
| 31 |                                                           |     | who discontinue or deviate from intervention protocols                   |       |
| 32 |                                                           |     |                                                                          |       |
| 33 | Data                                                      |     | Plans for data entry, coding, security, and storage, including any       |       |
| 34 | management                                                | 19  | related processes to promote data quality (eg, double data entry;        | 18    |
| 35 |                                                           |     | range checks for data values). Reference to where details of data        |       |
| 36 |                                                           |     | management procedures can be found, if not in the protocol               |       |
| 37 |                                                           |     |                                                                          |       |
| 38 |                                                           |     |                                                                          |       |
| 39 | Statistical                                               |     | Statistical methods for analysing primary and secondary outcomes.        |       |
| 40 | methods                                                   | 20a | Reference to where other details of the statistical analysis plan can    | 16-17 |
| 41 |                                                           |     | be found, if not in the protocol                                         |       |
| 42 |                                                           |     |                                                                          |       |
| 43 |                                                           | 20b | Methods for any additional analyses (eg, subgroup and adjusted           | 17    |
| 44 |                                                           |     | analyses)                                                                |       |
| 45 |                                                           |     |                                                                          |       |
| 46 |                                                           |     |                                                                          |       |
| 47 |                                                           | 20c | Definition of analysis population relating to protocol non-adherence     |       |
| 48 |                                                           |     | (eg, as randomised analysis), and any statistical methods to handle      | N/A   |
| 49 |                                                           |     | missing data (eg, multiple imputation)                                   |       |
| 50 |                                                           |     |                                                                          |       |
| 51 |                                                           |     |                                                                          |       |
| 52 | <b>Methods: Monitoring</b>                                |     |                                                                          |       |
| 53 |                                                           |     |                                                                          |       |
| 54 | Data monitoring                                           |     | Composition of data monitoring committee (DMC); summary of its           |       |
| 55 |                                                           | 21a | role and reporting structure; statement of whether it is independent     | N/A   |
| 56 |                                                           |     | from the sponsor and competing interests; and reference to where         |       |
| 57 |                                                           |     | further details about its charter can be found, if not in the protocol.  |       |
| 58 |                                                           |     | Alternatively, an explanation of why a DMC is not needed                 |       |
| 59 |                                                           |     |                                                                          |       |
| 60 |                                                           |     |                                                                          |       |

|    |                                 |                                                                          |       |
|----|---------------------------------|--------------------------------------------------------------------------|-------|
| 1  |                                 | Description of any interim analyses and stopping guidelines,             |       |
| 2  | 21b                             | including who will have access to these interim results and make         | N/A   |
| 3  |                                 | the final decision to terminate the trial                                |       |
| 4  |                                 |                                                                          |       |
| 5  | Harms                           | Plans for collecting, assessing, reporting, and managing solicited       |       |
| 6  | 22                              | and spontaneously reported adverse events and other unintended           | N/A   |
| 7  |                                 | effects of trial interventions or trial conduct                          |       |
| 8  |                                 |                                                                          |       |
| 9  | Auditing                        | Frequency and procedures for auditing trial conduct, if any, and         |       |
| 10 | 23                              | whether the process will be independent from investigators and the       | N/A   |
| 11 |                                 | sponsor                                                                  |       |
| 12 |                                 |                                                                          |       |
| 13 |                                 |                                                                          |       |
| 14 |                                 |                                                                          |       |
| 15 | <b>Ethics and dissemination</b> |                                                                          |       |
| 16 | Research ethics                 | Plans for seeking research ethics committee/institutional review         |       |
| 17 | approval                        | board (REC/IRB) approval                                                 | 19    |
| 18 |                                 |                                                                          |       |
| 19 | Protocol                        | Plans for communicating important protocol modifications (eg,            |       |
| 20 | amendments                      | changes to eligibility criteria, outcomes, analyses) to relevant parties |       |
| 21 | 25                              | (eg, investigators, REC/IRBs, trial participants, trial registries,      | N/A   |
| 22 |                                 | journals, regulators)                                                    |       |
| 23 |                                 |                                                                          |       |
| 24 |                                 |                                                                          |       |
| 25 | Consent or                      | Who will obtain informed consent or assent from potential trial          |       |
| 26 | assent                          | participants or authorised surrogates, and how (see Item 32)             | 15,18 |
| 27 | 26a                             |                                                                          |       |
| 28 |                                 |                                                                          |       |
| 29 | 26b                             | Additional consent provisions for collection and use of participant      | N/A   |
| 30 |                                 | data and biological specimens in ancillary studies, if applicable        |       |
| 31 |                                 |                                                                          |       |
| 32 | Confidentiality                 | How personal information about potential and enrolled participants       |       |
| 33 | 27                              | will be collected, shared, and maintained in order to protect            | 18    |
| 34 |                                 | confidentiality before, during, and after the trial                      |       |
| 35 |                                 |                                                                          |       |
| 36 | Declaration of                  | Financial and other competing interests for principal investigators      |       |
| 37 | interests                       | for the overall trial and each study site                                | 24    |
| 38 |                                 |                                                                          |       |
| 39 | Access to data                  | Statement of who will have access to the final trial dataset, and        |       |
| 40 | 29                              | disclosure of contractual agreements that limit such access for          | 19-20 |
| 41 |                                 | investigators                                                            |       |
| 42 |                                 |                                                                          |       |
| 43 |                                 |                                                                          |       |
| 44 | Ancillary and                   | Provisions, if any, for ancillary and post-trial care, and for           |       |
| 45 | post-trial care                 | compensation to those who suffer harm from trial participation           | N/A   |
| 46 |                                 |                                                                          |       |
| 47 | Dissemination                   | Plans for investigators and sponsor to communicate trial results to      |       |
| 48 | policy                          | participants, healthcare professionals, the public, and other relevant   |       |
| 49 | 31a                             | groups (eg, via publication, reporting in results databases, or other    | 20    |
| 50 |                                 | data sharing arrangements), including any publication restrictions       |       |
| 51 |                                 |                                                                          |       |
| 52 |                                 |                                                                          |       |
| 53 | 31b                             | Authorship eligibility guidelines and any intended use of                | N/A   |
| 54 |                                 | professional writers                                                     |       |
| 55 |                                 |                                                                          |       |
| 56 | 31c                             | Plans, if any, for granting public access to the full protocol,          | 18    |
| 57 |                                 | participant-level dataset, and statistical code                          |       |
| 58 |                                 |                                                                          |       |
| 59 |                                 |                                                                          |       |
| 60 | <b>Appendices</b>               |                                                                          | 19-20 |

|   |            |    |                                                                        |       |
|---|------------|----|------------------------------------------------------------------------|-------|
| 1 | Informed   |    | Model consent form and other related documentation given to            |       |
| 2 | consent    | 32 | participants and authorised surrogates                                 | 28,29 |
| 3 | materials  |    |                                                                        |       |
| 4 |            |    |                                                                        |       |
| 5 | Biological |    | Plans for collection, laboratory evaluation, and storage of biological |       |
| 6 | specimens  | 33 | specimens for genetic or molecular analysis in the current trial and   | N/A   |
| 7 |            |    | for future use in ancillary studies, if applicable                     |       |
| 8 |            |    |                                                                        |       |

\*It is strongly recommended that this checklist be read in conjunction with the SPIRIT 2013 Explanation & Elaboration for important clarification on the items. Amendments to the protocol should be tracked and dated. The SPIRIT checklist is copyrighted by the SPIRIT Group under the Creative Commons "[Attribution-NonCommercial-NoDerivs 3.0 Unported](#)" license.

Reference: Chan A-W, Tetzlaff JM, Altman DG, et al. SPIRIT 2013 Statement: Defining standard protocol items for clinical trials. *Ann Intern Med.* 2013 Feb 5;158(3):200-207. doi: 10.7326/0003-4819-158-3-201302050-00583.

# BMJ Open

**The De-imFAR Phase II Project: A study protocol for a cluster randomized implementation trial to evaluate the effectiveness of de-implementation strategies to reduce low-value statin prescribing in the primary prevention of Cardiovascular Disease.**

|                               |                                                                                                                                                                                                                                                                                                                                                                                                                                                                                                                                                                                                                                                                                                                                                                                                                                                                                                                                                                                                                                                                                                                                                                                                                                                                                                                                                                                                                                                                                                                                                                                                                                                                                                                                                                                                                                                                                                                                                                                                                                                                                                                                                                                                                                                                                                                                                                                                              |
|-------------------------------|--------------------------------------------------------------------------------------------------------------------------------------------------------------------------------------------------------------------------------------------------------------------------------------------------------------------------------------------------------------------------------------------------------------------------------------------------------------------------------------------------------------------------------------------------------------------------------------------------------------------------------------------------------------------------------------------------------------------------------------------------------------------------------------------------------------------------------------------------------------------------------------------------------------------------------------------------------------------------------------------------------------------------------------------------------------------------------------------------------------------------------------------------------------------------------------------------------------------------------------------------------------------------------------------------------------------------------------------------------------------------------------------------------------------------------------------------------------------------------------------------------------------------------------------------------------------------------------------------------------------------------------------------------------------------------------------------------------------------------------------------------------------------------------------------------------------------------------------------------------------------------------------------------------------------------------------------------------------------------------------------------------------------------------------------------------------------------------------------------------------------------------------------------------------------------------------------------------------------------------------------------------------------------------------------------------------------------------------------------------------------------------------------------------|
| Journal:                      | <i>BMJ Open</i>                                                                                                                                                                                                                                                                                                                                                                                                                                                                                                                                                                                                                                                                                                                                                                                                                                                                                                                                                                                                                                                                                                                                                                                                                                                                                                                                                                                                                                                                                                                                                                                                                                                                                                                                                                                                                                                                                                                                                                                                                                                                                                                                                                                                                                                                                                                                                                                              |
| Manuscript ID                 | bmjopen-2023-078692.R2                                                                                                                                                                                                                                                                                                                                                                                                                                                                                                                                                                                                                                                                                                                                                                                                                                                                                                                                                                                                                                                                                                                                                                                                                                                                                                                                                                                                                                                                                                                                                                                                                                                                                                                                                                                                                                                                                                                                                                                                                                                                                                                                                                                                                                                                                                                                                                                       |
| Article Type:                 | Protocol                                                                                                                                                                                                                                                                                                                                                                                                                                                                                                                                                                                                                                                                                                                                                                                                                                                                                                                                                                                                                                                                                                                                                                                                                                                                                                                                                                                                                                                                                                                                                                                                                                                                                                                                                                                                                                                                                                                                                                                                                                                                                                                                                                                                                                                                                                                                                                                                     |
| Date Submitted by the Author: | 19-Mar-2024                                                                                                                                                                                                                                                                                                                                                                                                                                                                                                                                                                                                                                                                                                                                                                                                                                                                                                                                                                                                                                                                                                                                                                                                                                                                                                                                                                                                                                                                                                                                                                                                                                                                                                                                                                                                                                                                                                                                                                                                                                                                                                                                                                                                                                                                                                                                                                                                  |
| Complete List of Authors:     | <p>Sanchez , Alvaro; Osakidetza-Basque Health Service, Primary Care Research Unit of Bizkaia, Deputy Directorate of Healthcare Assistance; Biocruces Bizkaia Health Research Institute</p> <p>Pi Joan, Jose Ignacio; Osakidetza-Basque Health Service, Clinical Epidemiology Unit; Biocruces Bizkaia Health Research Institute</p> <p>Sainz de Rozas, Rita; Osakidetza-Basque Health Service, Primary Care Pharmacy Unit, Ezkerraldea-Enkarterri-Cruces Integrated Health Organization; Biocruces Bizkaia Health Research Institute</p> <p>Lekue, Itxasne; Osakidetza-Basque Health Service, Primary Care Pharmacy Unit, Ezkerraldea-Enkarterri-Cruces Integrated Health Organization; Biocruces Bizkaia Health Research Institute</p> <p>San Vicente, Ricardo; Osakidetza-Basque Health Service, Zumarraga Health Center, Goierri-Alto Urola Integrated Health Organization</p> <p>Quindimil, Jose Antonio; Osakidetza-Basque Health Service, Sestao Health Center, Barakaldo-Sestao Integrated Health Organization</p> <p>Rotaeche, Rafael; Osakidetza-Basque Health Service, Primary Care Research Unit of Gipuzkoa, Organization of Integrated Health Services of Gipuzkoa</p> <p>Etxeberria, Arritxu ; Osakidetza-Basque Health Service, Primary Care Pharmacy, Donostialdea Integrated Health Organization</p> <p>Mozo, Carmela; Osakidetza-Basque Health Service, Primary Care Pharmacy, Donostialdea Integrated Health Organization</p> <p>Martinez-Cengotitabengoa, Monica; University of the Basque Country, School of Pharmacy; Osakidetza-Basque Health Service</p> <p>Monge, Monica; Osakidetza-Basque Health Service, Corporate Pharmacy Service, Directorate of Healthcare Assistance</p> <p>Gómez-Ramírez, Cristina; Osakidetza-Basque Health Service, Cardiology Department, Cruces University Hospital, Ezkerraldea-Enkarterri-Cruces Integrated Health Organization</p> <p>Samper, Ricardo; Osakidetza-Basque Health Service, Corporate Pharmacy Service, Directorate of Healthcare Assistance</p> <p>Ogueta Lana, Mikel ; Osakidetza-Basque Health Service, Subdirectorate of Quality and Health Information Systems</p> <p>Celorrio, Sara; Osakidetza-Basque Health Service, Barakaldo-Sestao Integrated Health Organization</p> <p>Merino-Inda, Nerea; Biocruces Bizkaia Health Research Institute</p> <p>Llarena, Marta; Biocruces Bizkaia Health Research Institute, Network for</p> |

|                                 |                                                                                                                                                                                                                                                                                                                                                                                                                                                                                                                                                                                                                                        |
|---------------------------------|----------------------------------------------------------------------------------------------------------------------------------------------------------------------------------------------------------------------------------------------------------------------------------------------------------------------------------------------------------------------------------------------------------------------------------------------------------------------------------------------------------------------------------------------------------------------------------------------------------------------------------------|
|                                 | <p>Research on Chronicity, Primary Care, and Health Promotion (RICAPPS) Gonzalez Saenz de Tejada, Marta; Biocruces Bizkaia Health Research Institute, Network for Research on Chronicity, Primary Care, and Health Promotion (RICAPPS)</p> <p>García-Alvarez, Arturo; Osakidetza-Basque Health Service, Primary Care Research Unit of Bizkaia. Deputy Directorate of Healthcare Assistance; Biocruces Bizkaia Health Research Institute</p> <p>Grandes, Gonzalo; Osakidetza-Basque Health Service, Primary Care Research Unit of Bizkaia. Deputy Directorate of Healthcare Assistance; Biocruces Bizkaia Health Research Institute</p> |
| <b>Primary Subject Heading</b>: | Evidence based practice                                                                                                                                                                                                                                                                                                                                                                                                                                                                                                                                                                                                                |
| Secondary Subject Heading:      | General practice / Family practice, Health services research, Cardiovascular medicine, Research methods                                                                                                                                                                                                                                                                                                                                                                                                                                                                                                                                |
| Keywords:                       | Primary Care < Primary Health Care, Clinical Decision-Making, Clinical Trial, PREVENTIVE MEDICINE, Implementation Science, Cardiovascular Disease                                                                                                                                                                                                                                                                                                                                                                                                                                                                                      |
|                                 |                                                                                                                                                                                                                                                                                                                                                                                                                                                                                                                                                                                                                                        |

SCHOLARONE™  
Manuscripts

1  
2  
3  
4  
5  
6  
7  
8  
9  
10  
11  
12  
13  
14  
15  
16  
17  
18  
19  
20  
21  
22  
23  
24  
25  
26  
27  
28  
29  
30  
31  
32  
33  
34  
35  
36  
37  
38  
39  
40  
41  
42  
43  
44  
45  
46  
47  
48  
49  
50  
51  
52  
53  
54  
55  
56  
57  
58  
59  
60

## TITLE PAGE

### Title

**The De-imFAR Phase II Project: A study protocol for a cluster randomized implementation trial to evaluate the effectiveness of de-implementation strategies to reduce low-value statin prescribing in the primary prevention of Cardiovascular Disease.**

**Author's details** Alvaro Sanchez<sup>1\*</sup>, Jose I. Pijoan<sup>2</sup>, Rita Sainz de Rozas<sup>3</sup>, Itxasne Lekue<sup>3</sup>, Ricardo San Vicente<sup>4</sup>, Jose Antonio Quindimil<sup>5</sup>, Rafael Rotaecche<sup>6</sup>, Arritxu Etxeberria<sup>7</sup>, Carmela Mozo<sup>7</sup>, Monica Martinez-Cengotitabengoa<sup>8</sup>, Monica Monge<sup>9</sup>, Cristina Gómez-Ramírez<sup>10</sup>, Ricardo Samper<sup>11</sup>, Mikel Ogueta Lana<sup>12</sup>, Sara Celorrio<sup>13</sup>, Nerea Merino-Inda<sup>14</sup>, Marta Llarena<sup>15</sup>, Marta Gonzalez Saenz de Tejada<sup>15</sup>, Arturo Garcia-Alvarez<sup>1</sup>, and Gonzalo Grandes<sup>1</sup>

<sup>1</sup> Primary Care Research Unit of Bizkaia, Deputy Directorate of Healthcare Assistance, Biobizkaia Health Research Institute, Basque Health Service - Osakidetza, Network for Research on Chronicity, Primary Care, and Health Promotion (RICAPPS), Barakaldo, Bizkaia, Spain.

<sup>2</sup> Clinical Epidemiology Unit, Biobizkaia Health Research Institute, Basque Health Service - Osakidetza, Barakaldo, Bizkaia, Spain. CIBER de Epidemiología y Salud Pública (CIBERESP), Instituto de Salud Carlos III, Spain.

<sup>3</sup> Primary Care Pharmacy Unit, Ezkerraldea-Enkarterri-Cruces Integrated Health Organization, Basque Health Service – Osakidetza, Biobizkaia Health Research Institute, Barakaldo, Bizkaia, Spain.

<sup>4</sup> Zumarraga Health Center, Goierri-Alto Urola Integrated Health Organization, Basque Health Service – Osakidetza, Zumárraga, Gipuzkoa, Spain.

<sup>5</sup> Sestao Health Center, Barakaldo-Sestao Integrated Health Organization, Basque Health Service – Osakidetza, Sestao, Bizkaia, Spain.



1  
2  
3 29 <sup>6</sup> Primary Care Research Unit of Gipuzkoa, Organization of Integrated Health Services  
4  
5 30 of Gipuzkoa, Biogipuzkoa Health Research Institute, Donostia-San Sebastian,  
6  
7 31 Gipuzkoa, Spain

8  
9 32 <sup>7</sup> Primary Care Pharmacy, Donostialdea Integrated Health Organization, Hernani,  
10  
11 33 Gipuzkoa, Spain

12  
13 34 <sup>8</sup> School of Pharmacy, University of the Basque Country UPV/EHU, Vitoria-Gasteiz,  
14  
15 35 Spain. Psychology Clinic of East Anglia, Norwich, UK. Osakidetza Basque Health  
16  
17 36 Service, Barakaldo, Spain.

18  
19  
20 37 <sup>9</sup> Corporate Pharmacy Service, Directorate of Healthcare Assistance, Osakidetza-  
21  
22 38 Basque Health Service Central Services, Vitoria-Gasteiz, Spain

23  
24 39 <sup>10</sup> Cardiology Department, Cruces University Hospital, Ezkerraldea-Enkarterri-Cruces  
25  
26 40 Integrated Health Organization, Basque Health Service – Osakidetza, Barakaldo,  
27  
28 41 Bizkaia, Spain.

29  
30 42 <sup>11</sup> Corporate Pharmacy Service, Directorate of Healthcare Assistance, Osakidetza-  
31  
32 43 Basque Health Service Central Services, Vitoria-Gasteiz, Spain

33  
34 44 <sup>12</sup> Subdirectorate of Quality and Health Information Systems, Osakidetza-Basque Health  
35  
36 45 Service Central Services, Vitoria-Gasteiz, Spain

37  
38  
39 46 <sup>13</sup> Barakaldo-Sestao Integrated Health Organization, Basque Health Service –  
40  
41 47 Osakidetza, Barakaldo, Spain

42  
43 48 <sup>14</sup> Biobizkaia Health Research Institute, Barakaldo, Bizkaia, Spain.

44  
45 49 <sup>15</sup> Biobizkaia Health Research Institute, Network for Research on Chronicity, Primary  
46  
47 50 Care, and Health Promotion (RICAPPS), Barakaldo, Bizkaia, Spain.

48  
49  
50 51

51  
52 52 **\* Corresponding author:**

53  
54 53 Alvaro Sánchez

55  
56 54 E-mail: [Alvaro.sanchezperez@osakidetza.eus](mailto:Alvaro.sanchezperez@osakidetza.eus)

57  
58 55 Primary Care Research Unit of Bizkaia, Deputy Directorate of Healthcare Assistance,

59  
60 56 Biobizkaia Health Research Institute, Basque Health Service – Osakidetza, Network for

1  
2  
3 57 Research on Chronicity, Primary Care, and Health Promotion (RICAPPS). Plaza Cruces  
4  
5 58 s/n, E-48903 Barakaldo, Bizkaia, Spain.  
6  
7 59

## 60 **ABSTRACT**

### 61 **Introduction**

62 This study aims to reduce potentially inappropriate prescribing (PIP) of statins and foster  
63 healthy lifestyle promotion in cardiovascular disease (CVD) primary prevention in low-  
64 risk patients. To this end, we will compare the effectiveness and feasibility of several de-  
65 implementation strategies developed following the structured design process of the  
66 Behavior Change Wheel targeting key determinants of clinical decision-making process  
67 in CVD prevention.

### 68 **Methods and analysis**

69 A cluster randomized implementation trial, with an additional control group, will be  
70 launched, involving family physicians (FPs) from 13 Integrated Healthcare Organizations  
71 (IHOs) of Osakidetza-Basque Health Service with non-zero incidence rates of PIP of  
72 statins in 2021. All FPs will be exposed to a non-reflective decision assistance strategy  
73 based on reminders and decision support tools. Additionally, FPs from two of the IHOs  
74 will be randomly assigned to one of two increasingly intensive de-implementation  
75 strategies: adding a decision information strategy based on knowledge dissemination,  
76 and a reflective decision structure strategy through audit/feedback. The target population  
77 comprises 45- to 74-year-old women and 40- to 74-year-old men with moderately  
78 elevated cholesterol levels but no diagnosed CVD and low cardiovascular risk  
79 (REGICOR <7.5%), who attend at least one appointment with any of the participating  
80 FPs (May 2022-May 2023), and will be followed until May 2024. We use the Reach,  
81 Effectiveness, Adoption, Implementation and Maintenance (RE-AIM) framework to  
82 evaluate outcomes. The main outcome will be the change in the incidence rate of PIP of  
83 statins and healthy lifestyle counseling in the study population 12 and 24 months after

1  
2  
3 84 FPs' exposure to the strategies. Moreover, FPs' perception of their feasibility and  
4  
5 85 acceptability, and patient experience regarding quality of care received will be evaluated.  
6

7 86 **Ethics and dissemination**  
8

9 87 The study was approved by the Basque Country Clinical Research Ethics Committee  
10  
11 88 and was registered in ClinicalTrials.gov (NCT04022850). Results will be disseminated in  
12  
13 89 scientific peer-reviewed journals.  
14  
15

16 90 **Keywords:** Inappropriate Prescribing, Cardiovascular Diseases / prevention & control,  
17  
18 91 Hypercholesterolemia / drug therapy, Implementation Science, Research Design,  
19  
20 92 Primary care.  
21  
22

23 93

24  
25 94 **STRENGTHS AND LIMITATIONS OF THIS STUDY**  
26

- 27 95 • A strength of the DE-imFAR study is that it involves an efficient design that  
28  
29 96 combines experimental and non-experimental comparisons through two randomly  
30  
31 97 assigned intervention arms and one non-randomized control arm to test the  
32  
33 98 comparative effectiveness on reducing potentially inappropriate prescribing (PIP)  
34  
35 99 of statins and increasing healthy lifestyle promotion of several de-implementation  
36  
37 100 strategies deployed in real-world settings.  
38  
39 101 • Counting with one non-randomized control arm is a strength because it allows  
40  
41 102 capturing the effect of temporal trends, regression to the mean, and the learning  
42  
43 103 curve due to the reference/background strategy to which all targeted family  
44  
45 104 physicians (FPs) are exposed, when comparing this reference strategy with the  
46  
47 105 two experimental de-implementation strategies.  
48  
49 106 • Another strength is the use of qualitative methods to better understand, from the  
50  
51 107 perspective of the study participants, the reasons why (why not) the strategies  
52  
53 108 work, to explain the variations in the results achieved and to identify the essential  
54  
55 109 components of the strategy and those that will require to be optimized.  
56  
57  
58  
59  
60

- 1  
2  
3 110 • To the best of our knowledge, the DE-imFAR study is one of the firsts of its kind  
4  
5 111 that specifically uses the RE-AIM framework for the evaluation of the study results  
6  
7 112 in terms of public health impacts.  
8  
9 113 • The main limitation lies in the planned comparisons of the randomized groups with  
10  
11 114 respect to the control arm, likely to differ to some extent at baseline because of  
12  
13 115 the non-random process of generation. To tackle this limitation, in addition to  
14  
15 116 evaluating the change in PIP incidence in all eligible FPs, a matching strategy with  
16  
17 117 the selection of one matched FP from this non-randomized group for each of the  
18  
19 118 randomized FPs will be performed in order to increase comparability and reduce  
20  
21 119 potential bias.  
22  
23  
24  
25

## 26 121 INTRODUCTION

27  
28 122 Reducing low-value healthcare, that is, clinical practices that have not been shown to be  
29  
30 123 efficient or effective, is becoming a global priority due to the widespread empirical  
31  
32 124 evidence of its high prevalence across healthcare systems, potential harm and its impact  
33  
34 125 on patient safety, resource use, and social inefficiency [1,2].  
35  
36  
37 126

38  
39 127 Nonetheless, reducing or eliminating low-value practices is a complex matter, since  
40  
41 128 drivers that foster or maintain them seem to operate at multiple levels and be context  
42  
43 129 specific. Therefore, in order to design effective and efficient corrective measures, a  
44  
45 130 careful process of formal analysis of the determinants of the clinical behavior in question  
46  
47 131 is needed. In this context, behavior change theory has been extensively applied to  
48  
49 132 understand the factors that may influence clinical behavior, identify and design possible  
50  
51 133 techniques and interventions that could be used to change it, and explain the  
52  
53 134 mechanisms through which such interventions operate [3,4].  
54  
55  
56 135

57  
58 136 The DE-imFAR study (“De-implementation of low-value pharmacological prescribing” in  
59  
60 137 Spanish) is a two-phase project [5] that aims to apply behavioral science theory within a

1  
2  
3 138 structured process involving the main stakeholders (health professionals, patients, and  
4  
5 139 researchers) in the design, deployment, and evaluation of targeted de-implementation  
6  
7 140 strategies to reduce potentially inappropriate prescribing (PIP). Specifically, in the DE-  
8  
9 141 imFAR study the target low-value practice is the pharmacological prescription of statins  
10  
11 142 in the primary prevention of cardiovascular disease (CVD) in low-risk patients. In order  
12  
13 143 to prevent CVD, one of the leading causes of morbidity and death worldwide, there is  
14  
15 144 general agreement on the indication of lipid-lowering treatment, mainly with statins, for  
16  
17 145 patients with a 10-year cardiovascular risk (CVR) greater than 10% or in the secondary  
18  
19 146 prevention [6-9]. Whereas, in the primary prevention for patients with low CVR (<10%),  
20  
21 147 preventive activities should be focused on the promotion of healthy lifestyles through  
22  
23 148 optimizing diet, increasing physical activity, and stopping smoking [6-9]. Moreover,  
24  
25 149 international guidelines encourage discussion with patients about the benefits of lifestyle  
26  
27 150 modification for the prevention of CVD, as well as other modifiable risk factors, before  
28  
29 151 considering pharmacological treatment [7-9].  
30  
31  
32  
33

34  
35 153 Within the Phase I of the DE-imFAR study, we first conducted a cross-sectional  
36  
37 154 observational study on the incidence of PIP of statins and provision of advice on lifestyle  
38  
39 155 modification in the Basque Health Service-Osakidetza in 2018. The results showed that  
40  
41 156 the prescription of statins had notably increased in the Basque Country (Spain) with an  
42  
43 157 estimated incidence of new PIP of 10.5 per 100,000 persons/year in patients aged 40 to  
44  
45 158 75 years, without CVD, with moderately elevated cholesterol levels but with a CVR <5%  
46  
47 159 [10].  
48

49 160  
50  
51 161 Secondly, we applied two of the most successfully used behavior change theories in the  
52  
53 162 field of Implementation Science, the Theoretical Domains Framework (TDF) [3,11,12]  
54  
55 163 and Behavior Change Wheel (BCW) [13], to a) understand and define the problem (low-  
56  
57 164 value practice) in behavioral terms and select and specify the target behaviors; b) identify  
58  
59 165 the factors that may influence it; and c) map targeted de-implementation and  
60

1  
2  
3 166 implementation strategies conducive to reducing the low-value practice in question.  
4  
5 167 Briefly, after having prioritized our specific target behavior (that is “clinician decision-  
6  
7 168 making on intervention/treatment to be provided based on objective clinical information  
8  
9 169 and subjective schemas and heuristics”), identified the determinants (facilitators of the  
10  
11 170 non-desired behavior of PIP of statins and barriers to apply the recommended clinical  
12  
13 171 practice behavior of promoting healthy lifestyles), and mapped specific behavior change  
14  
15 172 techniques, three types of de-implementation strategies were selected based on being  
16  
17 173 the most potentially effective, feasible, and acceptable to influence decision-making  
18  
19 174 through different mechanisms [14]. Hence, the three strategies derived from the  
20  
21 175 systematic theory- and evidence-based intervention design process were: a) a non-  
22  
23 176 reflective decision assistance strategy based on providing family physicians (FP) with  
24  
25 177 evidence-based information communication technology tools to help and guide decision-  
26  
27 178 making; b) a decision information strategy based on the dissemination of CVD primary  
28  
29 179 prevention evidence framed in a corporate campaign encouraging FPs to abandon PIP;  
30  
31 180 and c) a reflective decision structure strategy encouraging reflection on actual  
32  
33 181 performance based on an audit/feedback system [14].  
34  
35  
36  
37  
38

39 183 According to the literature review performed within the Phase I of the DE-imFAR project  
40  
41 184 [14] regarding the evaluation of effective intervention strategies for the reduction of low-  
42  
43 185 value prescribing [15-24], multicomponent interventions—combining passive  
44  
45 186 dissemination interventions, based on training in or dissemination of clinical practice  
46  
47 187 guidelines (CPGs), with more proactive interventions incorporating decision-making aids  
48  
49 188 or sending audit/feedback—achieve the most positive results. Specifically, in the context  
50  
51 189 of PIP of statins, a positive impact was observed on recording of CVR and prescription  
52  
53 190 adequacy using a) multicomponent dissemination strategies including informational  
54  
55 191 websites and implementation of electronic CPGs compared to routine practice and  
56  
57 192 training activities, and b) interventions based on sending clinical scenarios/cases and  
58  
59 193 audit/feedback to professionals as well as decision support tools [19-23]. All these

1  
2  
3 194 strategies can be conceived and theoretically differentiated in terms of how they may  
4  
5 195 affect clinicians' decision-making [25]. There is plenty of evidence to support de-  
6  
7 196 implementation of inappropriate medical practices through the lens of clinician cognition  
8  
9 197 using audit/feedback, decision support tools, etc. [26-28]. In this context, the growing  
10  
11 198 field of choice architecture aims to explore how the structure and framing of decision  
12  
13 199 situations influence the choice of certain behaviors over alternative ones. On the one  
14  
15 200 hand, FPs' decision-making ability can be influenced by unconscious processes that  
16  
17 201 occur in response to environmental or emotive cues, that is, through Type 1 (or  
18  
19 202 automatic) cognition. On the other, clinicians' conscious intention to change can be  
20  
21 203 promoted by engaging their reflective cognition to consciously evaluate and correct their  
22  
23 204 inappropriate behavior, that is, using Type 2 (or reflective) cognition [29]. However,  
24  
25 205 further research is needed to determine whether these evidence-based and barrier-  
26  
27 206 specific de-implementation strategies identified in the DE-imFAR Phase I are also  
28  
29 207 effective in our context.  
30  
31

32  
33 208

34  
35 209 Thus, the goal of the present Phase II of the DE-imFAR study is to assess the potential  
36  
37 210 effectiveness and feasibility of this set of de-implementation strategies to reduce the PIP  
38  
39 211 of statins in the primary prevention of CVD (low-risk patients, REGICOR [30] CVR score  
40  
41 212 <7.5%, with moderately elevated cholesterol levels, low-density lipoprotein (LDL)  
42  
43 213 cholesterol levels between 70 and 189 mg/dL and/or total cholesterol (TC) between 200  
44  
45 214 and 289 mg/dL, but without ischemic heart disease/CVD).  
46  
47

48  
49 215

50 216 Specifically, we aim to answer the following research questions:

51 217 1. Observational comparison questions:

52  
53 218 Compared to a reference non-reflective decision assistance strategy based on reminders  
54  
55 219 and decision support tools integrated into the electronic health record (EHR) to help  
56  
57 220 clinical decision-making, what is the effect on the incidence of PIP of statins and of  
58  
59 221 delivery of healthy lifestyle counseling in CVD primary prevention of a) a decision  
60

1  
2  
3 222 information strategy comprising a corporate “Stopping Low-Value Prescribing” campaign  
4  
5 223 and the dissemination of evidence-based CPGs for the primary prevention of CVD; b) a  
6  
7 224 reflective decision structure strategy based on an audit/feedback system; and c) any  
8  
9 225 intervention based on a reflective de-implementation strategy (a or b)?  
10

11 226

12  
13 227 2. Experimental comparison question:

14  
15 228 Compared to a decision information strategy comprising a corporate “Stopping Low-  
16  
17 229 Value Prescribing” campaign and the dissemination of evidence-based CPGs for the  
18  
19 230 primary prevention of CVD, together with the non-reflective decision assistance  
20  
21 231 intervention based on reminders and decision support tools integrated into the EHR to  
22  
23 232 help clinical decision-making, what is the effect on the incidence of PIP of statins and of  
24  
25 233 delivery of healthy lifestyle counseling in CVD primary prevention of adding a reflective  
26  
27 234 decision structure strategy based on an audit/feedback system?  
28  
29

30 235

## 31 32 236 **METHODS AND ANALYSIS**

### 33 34 237 **Design**

35  
36 238 A cluster randomized implementation trial with an additional control group will be  
37  
38 239 conducted to evaluate the potential effectiveness and feasibility of three de-  
39  
40 240 implementation strategies (Figure 1). A mixed methods evaluation will be undertaken:  
41  
42 241 quantitative in order to assess the implementation results at professional level  
43  
44 242 (effectiveness outcomes regarding changes in the incidence rates of PIP of statins and  
45  
46 243 provision of healthy lifestyle counseling) and qualitative to assess the feasibility and  
47  
48 244 perceived impact of the de-implementation strategies from the FPs’ perspective and  
49  
50 245 patients’ experience and satisfaction with the clinical care received. The unit of  
51  
52 246 randomization and intervention will be the primary care FP, while observation and  
53  
54 247 analysis will be performed at professional and patient levels. The DE-imFAR research  
55  
56 248 protocol was reviewed and approved by the Basque Country Clinical Research Ethics  
57  
58 249 Committee (Reference: EOM2022018, approved on 30 March 2022) and was registered  
59  
60



1  
2  
3 250 in the U.S. NLM ClinicalTrials.gov database (ClinicalTrials.gov Identifier NCT04022850,  
4  
5 251 Registered 17 July 2019; Last update 5 February 2024).

6  
7 252

8  
9 253 Osakidetza-Basque Health Service provides universal coverage and services are free at  
10  
11 254 the point of use, aside from drug copayment, funded through regional general taxation.

12  
13 255 Primary, specialized, and social health-related service provision is organized around 13

14  
15 256 Integrated Healthcare Organizations (IHOs) that cover the 3 provinces of the region of

16  
17 257 the Basque Country: Araba, Bizkaia, and Gipuzkoa. Each resident is on the list of one

18  
19 258 FP or pediatrician who provides comprehensive primary care and refers patients to

20  
21 259 hospital and specialized services. Primary care professionals work in full-time teams,

22  
23 260 which include FPs, pediatricians, nurses and administrative staff, based at local centers

24  
25 261 that provide users with access to healthcare in a defined geographical area.

26  
27 262 We used the SPIRIT reporting guidelines and the SPIRIT checklist when writing the

28  
29 263 present study [31].

30  
31 264

## 32 33 265 **Participants**

34  
35 266 Eligibility criteria for the study will be:

36  
37 267 1. Professionals: FPs belonging to any of the 13 IHOs of Osakidetza with a non-zero

38  
39 268 annual incidence rate of PIP of statins at baseline (2021) with a minimum cluster size of

40  
41 269  $n \geq 10$  patients

42  
43 270 2. Patients: All 40- to 74-year-old men and 45- to 74-year-old women with no history of

44  
45 271 statin use, LDL cholesterol levels between 70 and 189 mg/dL and/or TC between 200

46  
47 272 and 289 mg/dL but without ischemic heart disease/CVD, and an estimated CVR

48  
49 273 REGICOR  $< 7.5\%$  who attend at least one appointment with any of the participating FP

50  
51 274 during the study period (from May 2022 to May 2023).

52  
53 275

## 54 55 276 **Clinical interventions**

1  
2  
3 277 The DE-imFAR study, with regard to the prescription of statins in the primary prevention  
4  
5 278 of CVD, follows the clinical practice recommendations in Osakidetza-Basque Health  
6  
7 279 Service and the Spanish National Health System [6] as well as several international  
8  
9 280 guidelines [7-9]. Thus, these are the recommendations concerning when to initiate  
10  
11 281 treatment in the primary prevention of CVD [6, 32]:

- 12  
13 282     ▪ For individuals aged 40 to 75 years with an estimated 10-year CVR REGICOR  
14  
15 283     >10%, initiation of statin therapy is recommended.
- 16  
17 284     ▪ In general, for individuals aged 40 to 75 years with CVR REGICOR <10% and  
18  
19 285     LDL cholesterol levels <190 mg/dL, it is recommended not to initiate statin  
20  
21 286     therapy, with the following considerations:
- 22  
23         ○ with CVR close to 10%, consider the presence of risk-enhancing factors  
24  
25 287         in decision-making.
- 26  
27 288         ○ with CVR <5%, it is recommended not to initiate statin therapy.
- 28  
29 289     ▪ For patients with LDL cholesterol levels  $\geq$ 190 mg/dL, it is recommended to assess  
30  
31 290     the presence of genetic dyslipidemia and potential cardiovascular risk-enhancing  
32  
33 291     factors. It is suggested to initiate statin therapy, together with healthy lifestyle  
34  
35 292     recommendations, regardless of cardiovascular risk.
- 36  
37 293

38  
39 294 In any case, the indication for treatment should be preceded and/or accompanied by  
40  
41 295 promotion of healthy lifestyles through healthful diet, regular physical activity and  
42  
43 296 smoking cessation. Moreover, it is recommended that the decision to initiate statin  
44  
45 297 therapy should consider individual baseline risk, absolute risk reduction and whether the  
46  
47 298 risk reduction justifies the potential harms and undesirable consequences of taking a  
48  
49 299 lifelong daily medication.

50  
51 300

### 52 53 301 **De-implementation strategies evaluated**

54  
55 302 Within the present Phase II of the DE-imFAR study, the three types of strategies that  
56  
57 303 were derived from the Phase I systematic theory- and evidence-based intervention  
58  
59 304 design process will be set up (see Supplemental file 1 for a more detailed description):

1  
2  
3 305 1) *A non-reflective decision assistance strategy* that targets Type 1 cognitive processes  
4  
5 306 through decision support systems that prompt and remind FPs about the recommended  
6  
7 307 practice in a simplified way, thereby reducing the cognitive burden. In short, pop-up  
8  
9 308 reminders and alerts with associated messages will be integrated into OSABIDE's  
10  
11 309 (Osakidetza's EHR system) REGICOR CVR calculator and PRESBIDE (the electronic  
12  
13 310 drug prescribing component). The tools devised include an interactive media-based  
14  
15 311 algorithm with the recommended practice for the primary prevention of CVD in low-risk  
16  
17 312 patients developed by an expert panel, and a patient information sheet that depicts and  
18  
19 313 promotes evidence-based practice to address cholesterol in the primary prevention of  
20  
21 314 CVD in low-risk patients.

22  
23  
24 315 2) *A both reflective and non-reflective decision information strategy* that targets both  
25  
26 316 Type 1 and 2 cognitive processes, based on the principle of knowledge dissemination  
27  
28 317 and consisting of a "Stopping Low-Value Prescribing" campaign run by the organization  
29  
30 318 (Osakidetza- Basque Health Service) that also eases access (decreasing the physical  
31  
32 319 effort required) to the evidence-based CPGs for the primary prevention of CVD in low-  
33  
34 320 risk patients.

35  
36  
37 321 3) *A reflective decision structure strategy* that targets Type 2 cognition through an  
38  
39 322 audit/feedback system that reports data about individual's and organizational  
40  
41 323 performance indicators with regard to PIP of statins and healthy lifestyle promotion to  
42  
43 324 prompt reflection on their own clinical practice, provided along with intention formation  
44  
45 325 and goal-setting-focused messages.

46  
47 326

### 327 **Allocation of intervention units to compared groups**

328 The DE-imFAR study is a cluster randomized implementation trial conducted under real  
329 world conditions in the primary prevention of CVD in Primary Care (PC) where both  
330 clinical practices, i.e., inappropriate statin prescription and substandard promotion of  
331 healthy lifestyles, occur. The aforementioned de-implementation strategies will be  
332 cumulatively deployed under routine conditions of healthcare service provision in

1  
2  
3 333 Osakidetza to reduce the low-value practice and increase the recommended practice by  
4  
5 334 PC healthcare professionals. Specifically, the decision support tools integrated into the  
6  
7 335 EHR (non-reflective decision assistance strategy) will be applied to all FPs from the 13  
8  
9 336 IHOs of Osakidetza. Further, in addition to this first strategy, eligible FPs belonging to  
10  
11 337 two IHOs (Barakaldo-Sestao and Ezkerraldea-Enkarterri-Cruces) will be randomly  
12  
13 338 assigned to the exposure to either the second (provision of decision information strategy)  
14  
15 339 or the second and third (provision of decision information and reflective decision structure  
16  
17 340 strategies). The allocation sequence within these two groups will be generated using a  
18  
19 341 specific restricted randomization scheme by one member of the research team. The  
20  
21 342 sequence will be concealed at the coordinating center. In all cases, FPs will be only  
22  
23 343 allocated to the study groups after they have agreed to participate through an opt-out  
24  
25 344 strategy. The data analyst and the staff in charge of measurements will be blind to FP  
26  
27 345 allocation to study arms. Given that the audit/feedback strategy will involve regular  
28  
29 346 reports privately sent to individuals, the participants in the experimental arms are also  
30  
31 347 expected to be blind to group allocation.  
32  
33  
34  
35  
36

348

### 349 **Outcome measures**

38  
39 350 To evaluate the implementation of the de-implementation strategies in terms of public  
40  
41 351 health impact, we will use the following dimensions of the Reach, Effectiveness,  
42  
43 352 Adoption, Implementation, and Maintenance (RE-AIM) framework [33]:  
44

#### 45 353 *Reach*

46  
47 354 Absolute number and percentage of patients in the target population who received the  
48  
49 355 recommended CVD primary prevention clinical intervention 12 months after FP's  
50  
51 356 exposure to the de-implementation strategies compared; and their representativeness.  
52

#### 53 357 *Effectiveness*

54  
55 358 The study's main outcome will measure both the change in the incidence of the PIP of  
56  
57 359 statins and the change in the incidence of the provision of healthy lifestyle advice in  
58  
59  
60

1  
2  
3 360 patients in the target population eligible for CVD primary prevention, from baseline to 12  
4  
5 361 months after exposure of target FPs to the de-implementation strategies.  
6

7 362  
8  
9 363 As a secondary outcome, we will compare the change in the incidence of CVR  
10  
11 364 (REGICOR) recording in the EHR, from baseline to 12 months after exposure of FPs to  
12  
13 365 the de-implementation strategies compared, in 40- to 74-year-old men and 45- to 74-  
14  
15 366 year-old women without ischemic heart disease/CVD.  
16

17 367 *Adoption*

18  
19  
20 368 Degree to which the recommended CVD primary prevention clinical intervention is  
21  
22 369 adopted by the FPs 12 months after their exposure to the de-implementation strategies,  
23  
24 370 that will be measured by the percentage of FPs who reduce PIP of statins and/or increase  
25  
26 371 health promotion activities in the target population; and their representativeness.  
27

28 372 *Implementation*

29  
30 373 The fidelity of the delivery of each de-implementation strategy under study (i.e., the  
31  
32 374 degree to which they were executed as planned) will be evaluated. To this end, a  
33  
34 375 complete record and subsequent description of the execution process, documentation of  
35  
36 376 adaptations made to the planned strategies, and process indicators of the delivery of and  
37  
38 377 exposure to the interventions (see Supplemental file 1 for specification of the exposure  
39  
40 378 to each strategy), will be used to assess the following components of fidelity: adherence,  
41  
42 379 dose, quality of delivery, professionals' responsiveness and program differentiation [34].  
43  
44

45 380 *Maintenance*

46  
47 381 Change in the incidence of PIP of statins and provision of healthy lifestyle counseling in  
48  
49 382 eligible patients, 24 months after exposure of FPs to the de-implementation strategies  
50  
51 383 compared to the levels observed at the 12-month assessment.  
52

53 384

54  
55 385 *Other study covariates*

56  
57 386 In addition, and informed by the cross-sectional observational study performed in the  
58  
59 387 Phase I of the DE-imFAR study [10], potential confounders that may bias the estimated  
60

1  
2  
3 388 effect of the de-implementation strategies on the change in PIP of statins will be  
4  
5 389 measured, both at a) health professional level: sociodemographic variables (age, sex),  
6  
7 390 baseline incidence rate of PIP of statins; and b) patient level: sociodemographic variables  
8  
9 391 (age, sex, socioeconomic status) and clinical variables (baseline cholesterol level,  
10  
11 392 presence of hypertension, prescribed antihypertensives, tobacco use).  
12

13  
14 393

### 15 394 **Feasibility Evaluation**

16  
17 395 Professionals' perception of the feasibility and acceptability of the de-implementation  
18  
19 396 strategies to enhance the provision of the recommended CVD primary prevention clinical  
20  
21 397 practice will be assessed through key informant semi-structured individual interviews.  
22  
23 398 The interviews will be carried out with at least 12 professionals until data saturation is  
24  
25 399 reached: at least six (three from each randomized arm) who reduced their PIP of statins  
26  
27 400 and at least six who did not, as informed by the quantitative results. The interview script  
28  
29 401 will contain open-ended questions that will focus on the perceived value of the de-  
30  
31 402 implementation strategies and recommendations for their optimization.  
32  
33

34  
35 403

36  
37 404 Patients' experience and perception of the quality of CVD prevention care received will  
38  
39 405 be also assessed through key informant semi-structured interviews. The interviews will  
40  
41 406 be carried out with at least ten patients until data saturation is reached: at least five  
42  
43 407 patients who were clinically managed according to the recommended practice and five  
44  
45 408 who did not. The interview script will contain open-ended questions that will focus on the  
46  
47 409 perceived care received.  
48

49  
50 410

51  
52 411 Both professional and patient interviews will be conducted by two researchers with  
53  
54 412 experience in qualitative research methods, as well as knowledge of the clinical field and  
55  
56 413 the project. The interviews will be audio recorded, with prior informed consent, and  
57  
58 414 verbatim transcribed. Regarding the analysis of the qualitative study, the responses will  
59  
60 415 be extracted from the interview transcripts. Several members of the research team will

1  
2  
3 416 participate in the analysis, promoting the exchange of perspectives and consensus, with  
4  
5 417 the aim of triangulating the analysis. Deductive and inductive approaches will be  
6  
7 418 combined. For the deductive approach, the discourse of each professional and patient  
8  
9 419 interviewed will be associated with constructs derived from the behavior change theories  
10  
11 420 (TDF, BCW, etc.) [3,11-13]. The inductive analysis will be based on the postulates of  
12  
13 421 grounded theory [35]. Researchers will use coding techniques, or line-by-line analysis,  
14  
15 422 looking for words and phrases that identify explanatory concepts. Subsequently,  
16  
17 423 thematic connections between the basic theoretical concepts and the data will be  
18  
19 424 developed.  
20  
21  
22 425

## 23 24 426 **Analysis**

25  
26 427 Frequencies and proportions along with the corresponding 95% confidence intervals  
27  
28 428 (CIs) will be used to describe the prevalence and cumulative incidence of PIP of statins  
29  
30 429 and healthy lifestyle counseling in the primary prevention of CVD by FPs. The primary  
31  
32 430 effectiveness outcomes will be the changes in the cumulative incidence of PIP of statins  
33  
34 431 and healthy lifestyle counseling in patients from the target population (individuals with no  
35  
36 432 history of statin use, LDL cholesterol levels between 70 and 189 mg/dL and/or TC  
37  
38 433 between 200 and 289 mg/dL, without past or current ischemic heart disease/CVD, and  
39  
40 434 an estimated CVR REGICOR <7.5% who attend at least one medical appointment with  
41  
42 435 their FP during the study period), from baseline to 12 months after exposure of FPs to  
43  
44 436 the de-implementation strategies. Therefore, to evaluate the impact of the three de-  
45  
46 437 implementation strategies, we will estimate the relative risk reduction of receiving PIP of  
47  
48 438 statins in patients from the target population whose FPs were assigned to the  
49  
50 439 experimental strategies over that in patients from the non-randomized group (non-  
51  
52 440 reflective decision assistance strategy group). With respect to this group and in order to  
53  
54 441 increase comparability and reduce potential bias, in addition to evaluating the change in  
55  
56 442 the incidence rate of PIP of statins in patients from all eligible FPs, we will select two  
57  
58 443 matched FPs from this non-randomized group for each of the randomized FP taking into  
59  
60

1  
2  
3 444 account both FP' characteristics (e.g., baseline incidence rate of PIP of statins, etc.) and  
4  
5 445 characteristics of the patients assigned to the FP (e.g., average socioeconomic status,  
6  
7 446 etc.). Change in the incidence rates of PIP of statins from baseline to 12 and 24 months  
8  
9 447 after FPs' exposure to the de-implementation strategies and the relative risk reduction  
10  
11 448 will be estimated with the corresponding 95% CIs. To adjust for potential confounding  
12  
13 449 factors, stratified statistical analyses and logistic models will be used. These models will  
14  
15 450 be extended to generalized mixed effects models to take into account the hierarchical  
16  
17 451 structure of data (patients nested within FPs and FPs within primary care teams), with  
18  
19 452 fixed effects (comparison group, effect of time on outcome indicators, and time-group  
20  
21 453 interactions) and random effects on the intercept and the time slope (for each patient,  
22  
23 454 FP, center, etc.). These models will be adjusted for potential confounders, following a  
24  
25 455 backward strategy, guided by the stratified analyses. A similar approach will be taken to  
26  
27 456 analyze the secondary outcomes. The analysis will be carried out using SAS (v. 9.2, SAS  
28  
29 457 Institute, Cary, NC, USA) and R (R Development Core Team, 2014).  
30  
31  
32  
33

34  
35 459 Calculation of the required sample size in the worst-case scenario, i.e. the comparison  
36  
37 460 between the two randomized de-implementation strategies, was based on: i) a baseline  
38  
39 461 incidence rate of statin PIP of 7.4% estimated among the patients from the target  
40  
41 462 population seen in 2021 by FPs with an incidence rate of statin PIP > 0% with a minimum  
42  
43 463 cluster size  $n \geq 10$  patients, ii) an intra-class correlation coefficient of 0.01, iii) an average  
44  
45 464 cluster size of 39 patients with a coefficient of variation of 0.63, iv)  $\alpha = 0.05$  and statistical  
46  
47 465 power of 80%, and v) hypothetical decreases in annual PIP incidence rates of 20% in  
48  
49 466 the decision information strategy group and 50% in the decision structure strategy group.  
50  
51 467 With these assumptions, it was estimated that at least 58 FPs were required for each  
52  
53 468 experimental arm.  
54  
55

56 469

## 57 470 **Management, quality, and safety in data processing**



1  
2  
3 471 This study will be carried out in accordance with international standards for the conduct  
4  
5 472 of epidemiological studies, included in the International Guidelines for Ethical Review of  
6  
7 473 Epidemiological Studies [36]. This is a prospective intervention study mainly focused on  
8  
9 474 the collection of information from data recorded by health professionals in the Osakidetza  
10  
11 475 EHR (OSABIDE) under routine clinical practice conditions. The process indicators  
12  
13 476 related to the professionals' clinical practice (prescription of statins and record in the  
14  
15 477 EHR of provision of personalized healthy lifestyle advice on the need to increase physical  
16  
17 478 activity, follow a healthy diet and smoking cessation), patients' sociodemographic and  
18  
19 479 clinical characteristics (age, sex, CVR, active health problems recorded in the EHR,  
20  
21 480 socioeconomic status, etc.) and clinical outcomes will be extracted from OSABIDE  
22  
23 481 through the corporate Oracle Business Intelligence platform. In particular, for the  
24  
25 482 provision of healthy lifestyle advice, OSABIDE includes a specific electronic form to  
26  
27 483 check that each single piece of advice (diet, exercise, tobacco quitting) was or was not  
28  
29 484 provided. The Primary Care Research Unit of Bizkaia is formally authorized to extract  
30  
31 485 and use data from the EHR for research purposes by the Healthcare Directorate of  
32  
33 486 Osakidetza. On the other hand, it will be necessary to inform participants (professionals  
34  
35 487 and patients) about the study and obtain their written informed consent concerning the  
36  
37 488 information directly collected from them through the key informant semi-structured  
38  
39 489 interviews (Supplemental File 2 and 3). All the information regarding the study subjects,  
40  
41 490 either expressly extracted for this research from EHRs or collected from the participants,  
42  
43 491 will be protected and treated confidentially for all purposes, in accordance with the  
44  
45 492 provisions of the Spanish Organic Law 3/2018, of 5 December, on Personal Data  
46  
47 493 Protection and digital rights guarantee (LOPD-GDD) and the provisions of Regulation  
48  
49 494 (EU) 2016/679 of the European Parliament and of the Council of 27 April 2016, on the  
50  
51 495 protection of natural persons with regard to the processing of personal data and on the  
52  
53 496 free movement of such data (General Data Protection Regulation, RGPD). Specifically,  
54  
55 497 all data will be anonymously documented and de-identified, linked to a unique code that  
56  
57 498 is meaningless without the context of the system. The final resulting database will be  
58  
59  
60

1  
2  
3 499 exported to a formatted plain text file that then will be compressed and encrypted using  
4  
5 500 a secure algorithm and subsequently will be processed and included in a robust and  
6  
7 501 secure database server.  
8

9 502

### 11 503 **Patient and public involvement**

13 504 Patients were involved in the DE-imFAR Phase I project as one of the main stakeholders  
14  
15 505 (health professionals, patients, and researchers) in the formative process conducted to  
16  
17 506 map and design de-implementation strategies to reduce PIP, which will be evaluated in  
18  
19 507 the DE-imFAR Phase II project. Specifically, during the Phase I project, a focus group  
20  
21 508 with six patients was conducted to ascertain patients' experience with the clinical practice  
22  
23 509 of statin prescription and triangulate physicians discourse [14].  
24  
25

26  
27 510 During the Phase II project, semi-structured interviews will be conducted with patients to  
28  
29 511 assess their experience and perception of the clinical care received as a result of their  
30  
31 512 healthcare professionals' exposure to the different de-implementation strategies. These  
32  
33 513 interviews will help to better understand from the perspective of the study participants  
34  
35 514 the reasons why the strategies work (or do not), to explain the variations in the outcomes  
36  
37 515 and to identify the key strategy components and those that need to be optimized as well  
38  
39 516 as triangulating the analysis.  
40

41 517

### 43 518 **DISCUSSION**

45  
46 519 The goal of the present study is to improve CVD primary prevention clinical practice in a  
47  
48 520 real world setting in primary care by putting into practice procedures and methods for the  
49  
50 521 design, deployment, and evaluation of implementation/de-implementation strategies  
51  
52 522 informed by behavioral and implementation sciences. Specifically, the Phase II of the  
53  
54 523 DE-imFAR study focuses on reducing PIP of statins in CVD primary prevention in  
55  
56 524 patients with moderate hypercholesterolemia and low CVR and fostering healthy lifestyle  
57  
58 525 promotion as the recommended treatment option. To do so, the study will deploy several  
59  
60

1  
2  
3 526 de-implementation strategies derived from the Phase I formative study that targets key  
4  
5 527 determinants of the decision-making process involved in the provision of CVD primary  
6  
7 528 prevention by FPs. If the results are successful, policymakers and health managers and  
8  
9 529 professionals will have valid and robust, locally relevant evidence that will support the  
10  
11 530 need to introduce these innovations in methods and procedures informed by  
12  
13 531 implementation science to tackle the hard task of reducing the burden of low-value  
14  
15 532 pharmacological prescription in clinical care services.  
16  
17  
18 533

## 20 534 **ETHICS AND DISSEMINATION**

22 535 The research protocol (version 1; 170221) was approved by the Basque Country Clinical  
23  
24 536 Research Ethics Committee (Reference: EOM2022018, approved on 30 March 2022)  
25  
26 537 and was registered in the U.S. NLM ClinicalTrials.gov database (ClinicalTrials.gov  
27  
28 538 Identifier NCT04022850, Registered 17 July 2019; Last update 5 February 2024).The  
29  
30 539 Primary Care Research Unit of Bizkaia is explicitly authorized by the Healthcare  
31  
32 540 Directorate of Osakidetza - Basque Health Service to extract and use data from EHRs  
33  
34 541 for research purposes. Since data supporting the present study will mostly concern  
35  
36 542 routine data retrieved from the EHR of the Basque Health Service-Osakidetza, it will be  
37  
38 543 only shared upon justified request to the study guarantors. The results of this study will  
39  
40 544 be disseminated via publication in scientific peer-reviewed journals.  
41  
42  
43  
44 545

## 46 546 **LIST OF ABBREVIATIONS**

48 547 EHR: Electronic health record  
49  
50 548 BCW: Behavior Change Wheel  
51  
52 549 CI: Confidence interval  
53  
54 550 CVD: Cardiovascular disease  
55  
56 551 CVR: Cardiovascular risk  
57  
58 552 CPG: Clinical practice guideline  
59  
60

- 1  
2  
3 553 FP: Family physician  
4  
5 554 IHO: Integrated Healthcare Organization  
6  
7 555 LDL: Low-density lipoprotein  
8  
9 556 PIP: Potentially inappropriate prescribing  
10  
11 557 PC: Primary care  
12  
13 558 RE-AIM: Reach, Effectiveness, Adoption, Implementation, and Maintenance  
14  
15 559 TC: Total cholesterol  
16  
17 560 TDF: Theoretical Domains Framework  
18  
19  
20 561

## 21 562 **FULL REFERENCES**

- 23  
24 563 1. Morgan DJ, Brownlee S, Leppin AL, et al. Setting a research agenda for medical overuse. *BMJ*.  
25 564 2015;351:h4534. doi: 10.1136/bmj.h4534.  
26 565  
27 566 2. Niven DJ, Mrklas KJ, Holodinsky JK, et al. Towards understanding the de-adoption of low-value clinical  
28 567 practices: a scoping review. *BMC Med*. 2015;13:255. doi: 10.1186/s12916-015-0488-z.  
29 568  
30 569 3. Michie S, Johnston M, Abraham C, et al. Making psychological theory useful for implementing evidence  
31 570 based practice: a consensus approach. *Qual Saf Health Care*. 2005;14(1):26-33.  
32 571 doi:10.1136/qshc.2004.011155.  
33 572  
34 573 4. Eccles M, Grimshaw J, Walker A, et al. Changing the behavior of healthcare professionals: the use of  
35 574 theory in promoting the uptake of research findings. *J Clin Epidemiol*. 2005;58(2):107-112.  
36 575 doi:10.1016/j.jclinepi.2004.09.002.  
37 576  
38 577 5. Sanchez A, Pijoan JI, Pablo S, et al. Addressing low-value pharmacological prescribing in primary  
39 578 prevention of CVD through a structured evidence-based and theory-informed process for the design and  
40 579 testing of de-implementation strategies: the DE-imFAR study. *Implement Sci*. 2020;15(1):8. Published 2020  
41 580 Jan 22. doi:10.1186/s13012-020-0966-3  
42 581  
43 582 6. Grupo de trabajo de la Guía de Práctica Clínica sobre el manejo de los lípidos como factor de riesgo  
44 583 cardiovascular. Guía de Práctica Clínica sobre el manejo de los lípidos como factor de riesgo cardiovascular.  
45 584 Ministerio de Sanidad, Servicios Sociales e Igualdad. OSTEBA; 2017. Guías de Práctica Clínica en el SNS.  
46 585  
47 586 7. National Institute for Health and Care Excellence. Cardiovascular disease: risk assessment and reduction,  
48 587 including lipid modification. [London]: NICE; 2014. [updated 2023 Feb 10] (Clinical guideline [CG181]).  
49 588 Available from: <https://www.nice.org.uk/guidance/cg181>.  
50 589  
51 590 8. Arnett DK, Blumenthal RS, Albert MA, et al. 2019 ACC/AHA Guideline on the Primary Prevention of  
52 591 Cardiovascular Disease: A Report of the American College of Cardiology/American Heart Association Task

- 1  
2  
3 592 Force on Clinical Practice Guidelines [published correction appears in *Circulation*. 2019 Sep  
4 593 10;140(11):e649-e650] [published correction appears in *Circulation*. 2020 Jan 28;141(4):e60] [published  
5 594 correction appears in *Circulation*. 2020 Apr 21;141(16):e774]. *Circulation* 2019;140(11):e596-e646.  
6 595 doi:10.1161/CIR.0000000000000678.  
7  
8 596  
9 597 9. Mach F, Baigent C, Catapano AL, et al. 2019 ESC/EAS Guidelines for the management of dyslipidaemias:  
10 598 lipid modification to reduce cardiovascular risk [published correction appears in *Eur Heart J*. 2020 Nov  
11 599 21;41(44):4255]. *Eur Heart J*. 2020;41(1):111-188. doi:10.1093/eurheartj/ehz455.  
12  
13 600  
14 601 10. Elizondo-Alzola U, Sánchez A, Pijoan JI, et al. Statins in primary prevention of cardiovascular disease:  
15 602 incidence of potentially inappropriate prescriptions in very low risk primary care patients and associated  
16 603 factors. *J Gen Pract*. 2022;10:456. doi: 10.37421/2329-9126.22. 10.461  
17 604  
18 605 11. Cane J, O'Connor D, Michie S. Validation of the theoretical domains framework for use in behaviour  
19 606 change and implementation research. *Implement Sci*. 2012;7:37. doi:10.1186/1748-5908-7-37.  
20 607  
21 608 12. Atkins L, Francis J, Islam R, et al. A guide to using the Theoretical Domains Framework of behaviour  
22 609 change to investigate implementation problems. *Implement Sci*. 2017;12(1):77. doi: 10.1186/s13012-017-  
23 610 0605-9.  
24 611  
25 612 13. Michie S, van Stralen MM, West R. The behaviour change wheel: a new method for characterising and  
26 613 designing behaviour change interventions. *Implement Sci*. 2011 23;6:42. Published 2011 Apr 23.  
27 614 doi:10.1186/1748-5908-6-42.  
28 615  
29 616 14. Sanchez A, Elizondo-Alzola U, Pijoan JI, et al. Applying the behavior change wheel to design de-  
30 617 implementation strategies to reduce low-value statin prescription in primary prevention of cardiovascular  
31 618 disease in primary care. *Front Med (Lausanne)*. 2022;9:967887. Published 2022 Oct 13.  
32 619 doi:10.3389/fmed.2022.967887.  
33 620  
34 621 15. Prasad V, Ioannidis JP. Evidence-based de-implementation for contradicted, unproven, and aspiring  
35 622 healthcare practices. *Implement Sci*. 2014;9:1. Published 2014 Jan 8. doi:10.1186/1748-5908-9-1.  
36 623  
37 624 16. Grimshaw JM, Thomas RE, MacLennan G, et al. Effectiveness and efficiency of guideline dissemination  
38 625 and implementation strategies. *Health Technol Assess*. 2004;8(6):iii-iv, 1-72. doi:10.3310/hta8060.  
39 626  
40 627 17. Jamtvedt G, Young JM, Kristoffersen DT, et al. Audit and feedback: effects on professional practice and  
41 628 health care outcomes. *Cochrane Database Syst Rev*. 2006;(2):CD000259. Published 2006 Apr 19.  
42 629 doi:10.1002/14651858.CD000259.pub2.  
43 630  
44 631 18. Kawamoto K, Houlihan CA, Balas EA, et al. Improving clinical practice using clinical decision support  
45 632 systems: a systematic review of trials to identify features critical to success. *BMJ*. 2005;330(7494):765.  
46 633 doi:10.1136/bmj.38398.500764.8F.  
47 634  
48  
49  
50  
51  
52  
53  
54  
55  
56  
57  
58  
59  
60

- 1  
2  
3 635 19. Keller H, Krones T, Becker A, et al. Arriba: effects of an educational intervention on prescribing behaviour  
4 636 in prevention of CVD in general practice. *Eur J Prev Cardiol.* 2012;19(3):322-9.  
5 637 doi:10.1177/1741826711404502.  
6  
7 638  
8 639 20. Arcoraci V, Santoni L, Ferrara R, et al. Effect of an educational program in primary care: the case of lipid  
9 640 control in cardio-cerebrovascular prevention. *Int J Immunopathol Pharmacol.* 2014;27(3):351-63.  
10 641 doi:10.1177/039463201402700305.  
11 642  
12 643 21. Dormuth CR, Carney G, Taylor S, et al. A randomized trial assessing the impact of a personal printed  
13 644 feedback portrait on statin prescribing in primary care. *J Contin Educ Health Prof.* 2012;32(3):153-62.  
14 645 doi:10.1002/chp.21140.  
15 646  
16 647 22. Harris MF, Parker SM, Litt J, et al. Implementing guidelines to routinely prevent chronic vascular disease  
17 648 in primary care: the Preventive Evidence into Practice cluster randomised controlled trial. *BMJ Open.*  
18 649 2015;5(12):e009397. Published 2015 Dec 11. doi:10.1136/bmjopen-2015-009397.  
19 650  
20 651 23. Liddy C, Hogg W, Singh J, et al. A real-world stepped wedge cluster randomized trial of practice  
21 652 facilitation to improve cardiovascular care. *Implement Sci.* 2015;10:150. Published 2015 Oct 28.  
22 653 doi:10.1186/s13012-015-0341-y.  
23 654  
24 655 24. Colla CH, Mainor AJ, Hargreaves C, et al. Interventions Aimed at Reducing Use of Low-Value Health  
25 656 Services: A Systematic Review. *Med Care Res Rev.* 2017;74(5):507-550. doi:10.1177/1077558716656970.  
26 657  
27 658 25. Münscher R, Vetter M, Scheuerle T. A review and taxonomy of choice architecture techniques. *J Behav*  
28 659 *Decis Mak.* 2016;29(5):511-24. doi.org/10.1002/bdm.1897.  
29 660  
30 661 26. Last BS, Bутtenheim AM, Timon CE, Mitra N, et al. Systematic review of clinician-directed nudges in  
31 662 healthcare contexts. *BMJ Open.* 2021;11(7):e048801. Published 2021 Jul 12. doi:10.1136/bmjopen-2021-  
32 663 048801.  
33 664  
34 665 27. Yoong SL, Hall A, Stacey F, et al. Nudge strategies to improve healthcare providers' implementation of  
35 666 evidence-based guidelines, policies and practices: a systematic review of trials included within Cochrane  
36 667 systematic reviews. *Implement Sci.* 2020;15(1):50. Published 2020 Jul 1. doi:10.1186/s13012-020-01011-  
37 668 0.  
38 669  
39 670 28. Lamprell K, Tran Y, Arnolda G, et al. Nudging clinicians: A systematic scoping review of the literature. *J*  
40 671 *Eval Clin Pract.* 2021;27(1):175-192. doi:10.1111/jep.13401.  
41 672  
42 673 29. Helfrich CD, Rose AJ, Hartmann CW, et al. How the dual process model of human cognition can inform  
43 674 efforts to de-implement ineffective and harmful clinical practices: A preliminary model of unlearning and  
44 675 substitution. *J Eval Clin Pract.* 2018;24(1):198-205. doi:10.1111/jep.12855.  
45 676  
46 677 30. D'Agostino RB Sr, Grundy S, Sullivan LM, et al. Validation of the Framingham coronary heart disease  
47 678 prediction scores: results of a multiple ethnic groups investigation. *JAMA.* 2001;286(2):180-187.  
48 679 doi:10.1001/jama.286.2.180.

- 1  
2  
3 680  
4 681 31. Chan A-W, Tetzlaff JM, Altman DG, et al. SPIRIT 2013 Statement: Defining standard protocol items for  
5 682 clinical trials. *Ann Intern Med.* 2013 Feb 5;158(3):200-207. doi: 10.7326/0003-4819-158-3-201302050-  
6 683 00583.  
7  
8 684  
9 685 32. COLESTEROL Y PREVENCIÓN PRIMARIA DE LA ENFERMEDAD CARDIOVASCULAR: El debate  
10 686 continúa. *INFAC.* 2022;30(7):65-75.  
11  
12 687  
13 688 33. Glasgow RE, Vogt TM, Boles SM. Evaluating the public health impact of health promotion interventions:  
14 689 the RE-AIM framework. *Am J Public Health.* 1999;89(9):1322-7. doi:10.2105/ajph.89.9.1322.  
15  
16 690  
17 691 34. Sánchez A, Rogers HL, Pablo S, et al. Fidelity evaluation of the compared procedures for conducting  
18 692 the PVS-PREDIAPS implementation strategy to optimize diabetes prevention in primary care. *BMC Fam*  
19 693 *Pract.* 2021;22(1):34. Published 2021 Feb 11. doi:10.1186/s12875-021-01378-z.  
20  
21 694  
22 695 35. Glaser B, Strauss A. *The Discovery of Grounded Theory: Strategies for Qualitative Research.* Sociology  
23 696 Press; Chicago IL; 1967.  
24  
25 697  
26 698 36. Council for International Organizations of Medical Sciences (CIOMS) in collaboration with the World  
27 699 Health Organization (WHO). *International Ethical Guidelines for Biomedical Research Involving Human*  
28 700 *Subjects.* Geneva, Switzerland: Council for International Organizations of Medical Sciences (CIOMS); 2002.  
29  
30 701

## 702 **AUTHORS' CONTRIBUTIONS**

703 AS, JIP, and GG conceived the idea and are the study guarantors. They are primarily  
704 responsible for the study design and planning, obtained funding, will be responsible for  
705 project coordination and supervision, analysis and interpretation of results, and were  
706 responsible for manuscript preparation. RSR, IL, RSV, JAQ, RR, AE, CM, MMC, MM,  
707 CGR, RS, MOL, SC, NMI, ML, MGST, and AGA are co-investigators of the projects and  
708 collaborated in the study design and/or manuscript preparation; and they will be  
709 responsible for study coordination and interpretation of results. AS, JIP, and AGA will be  
710 responsible for the analysis of results. All authors read and approved the final version of  
711 the manuscript.

## 712 **FUNDING STATEMENT**

714 This project was funded by Instituto de Salud Carlos III (ISCIII), co-funded by the  
715 European Union (European Regional Development Fund "A way to make Europe"),

1  
2  
3 716 through the projects: PI21/00025, RD16/0007/0002, and co-funded by the European  
4  
5 717 Union – NextGenerationEU funds, that finance the actions of the Recovery and  
6  
7 718 Resilience Facility (Mecanismo para la Recuperación y la Resiliencia -MRR), through  
8  
9 719 the project RD21/0016/0003. This project was also funded by the Health Department of  
10  
11 720 the Basque Government (funded projects 2018111085 and 2021111024). The funding  
12  
13 721 bodies have had no role in the design of the study, collection, analysis, or interpretation  
14  
15 722 of data or the writing of the manuscript.  
16  
17  
18 723

## 724 **COMPETING INTERESTS STATEMENT**

725 The authors declare that they have no competing interests.  
726

## 727 **ACKNOWLEDGMENTS**

728 The authors would like to thank the following colleagues in the Basque Health Service  
729 (Osakidetza) for their support: Gaspar Lantarón Amas (Subdirectorate of Care  
730 Integration) and Nagore Zarraonandia Ayo (Directorate of Care Integration) at  
731 Ezkerraldea-Enkarterri-Cruces Integrated Health Organization, Lourdes Vivanco  
732 (Medical Directorate) and Vanesa Martín (Quality Unit) at Barakaldo-Sestao Integrated  
733 Health Organization.  
734

## 735 **WORD COUNT**

736 4515 words excluding title page, abstract, strengths and limitations of this study, list of  
737 abbreviations, full references, authors' contributions, funding statement, competing  
738 interests statement and acknowledgements.



1  
2  
3  
4  
5  
6  
7  
8  
9  
10  
11  
12  
13  
14  
15  
16  
17  
18  
19  
20  
21  
22  
23  
24  
25  
26  
27  
28  
29  
30  
31  
32  
33  
34  
35  
36  
37  
38  
39  
40  
41  
42  
43  
44  
45  
46  
47  
48  
49  
50  
51  
52  
53  
54  
55  
56  
57  
58  
59  
60

739 **FIGURES**

740 **Figure 1. Study design diagram. (PDF format)**

741 Note: FP: Family Physician; IHO: Integrated Healthcare Organization; R: Randomization.

For peer review only

1  
2  
3 742 **SUPPLEMENTAL FILES**  
4

5 743 **Supplemental File 1 [DE-imFAR de-implementation strategies] (PDF format)**  
6  
7

8 744  
9  
10  
11  
12  
13  
14  
15  
16  
17  
18  
19  
20  
21  
22  
23  
24  
25  
26  
27  
28  
29  
30  
31  
32  
33  
34  
35  
36  
37  
38  
39  
40  
41  
42  
43  
44  
45  
46  
47  
48  
49  
50  
51  
52  
53  
54  
55  
56  
57  
58  
59  
60

For peer review only

1  
2  
3  
4  
5  
6  
7  
8  
9  
10  
11  
12  
13  
14  
15  
16  
17  
18  
19  
20  
21  
22  
23  
24  
25  
26  
27  
28  
29  
30  
31  
32  
33  
34  
35  
36  
37  
38  
39  
40  
41  
42  
43  
44  
45  
46  
47  
48  
49  
50  
51  
52  
53  
54  
55  
56  
57  
58  
59  
60

745 **Supplemental File 2 [DE-imFAR Phase II - Informed Consent Form for Family**  
746 **Physicians (Spanish)] (PDF format)**

747

For peer review only

1  
2  
3 748 **Supplemental File 3 [DE-imFAR Phase II - Informed Consent Form for Patients**  
4 **(Spanish)] (PDF format)**  
5  
6  
7  
8  
9  
10  
11  
12  
13  
14  
15  
16  
17  
18  
19  
20  
21  
22  
23  
24  
25  
26  
27  
28  
29  
30  
31  
32  
33  
34  
35  
36  
37  
38  
39  
40  
41  
42  
43  
44  
45  
46  
47  
48  
49  
50  
51  
52  
53  
54  
55  
56  
57  
58  
59  
60

For peer review only

# Experimental implementation trial with an additional control group

1  
2  
3  
4  
5  
6  
7  
8  
9  
10  
11  
12  
13  
14  
15  
16  
17  
18  
19  
20  
21  
22  
23  
24  
25  
26  
27  
28  
29  
30  
31  
32  
33  
34  
35  
36  
37  
38  
39  
40  
41



Change in the incidence of potentially inappropriate prescriptions and provision of lifestyle advice from baseline to 12 months after exposure of physicians to the compared strategies, in 40- to 74-year-old men and 45- to 74-year-old women with no history of statin use, with LDL-cholesterol levels between 70 and 189 mg/dl and/or Total Cholesterol between 200 and 289 mg/dl but without ischemic heart/cardiovascular disease and with an estimated cardiovascular risk  $<7.5\%$  attending during the field-work period

**Outcome**

# The DE-imFAR de-implementation strategies

## 1. Strategy - Non-reflective decision assistance strategy

Support for clinical decision-making on the primary prevention of cardiovascular disease (CVD) in low cardiovascular risk (CVR) patients integrated into the electronic health record (EHR) of the Basque Health Service (Osakidetza), based on pop-up reminders and alerts, together with an interactive media-based algorithm stating the recommended practice and a patient information sheet.

### 1.1. Target audience

This strategy targets all family physicians (FPs) from all 13 Integrated Healthcare Organizations (IHOs) of the Basque Health Service (Osakidetza), both in primary and specialist or hospital care.

### 1.2. Active components (actions) of the intervention

- “Lighthouse” guiding alert in the REGICOR CVR calculator. Reminders of recommended clinical practice in the primary prevention of CVD that pop-up in the REGICOR CVR calculator when the CVR is estimated in patients aged between 35 and 74 years old. The alert varies depending on the CVR score (<10% or ≥10%).



Figure 1. Pop-up reminder (“Lighthouse” guiding alert) in the REGICOR cardiovascular risk calculator when estimated cardiovascular risk score is <10%.

- Alerts in PRESBIDE. Pop-up reminders that appear when the PRESBIDE software is used to prescribe statins. There are three types of alerts depending on the patient’s age group (<35, 35-74, and ≥75 years old). Further, links are provided to a decision-making algorithm and a patient information sheet (i-botika).
- Decision-making algorithm: “Management of cholesterol as a risk factor in primary prevention of cardiovascular disease”. Clinical decision tree presenting potential courses of action based on clinical practice guidelines (CPGs), specifically for reducing cholesterol for the primary prevention of CVD in patients of different age groups and levels of CVR. Interactive decision-making support tool, developed by researchers collaborating in the DE-imFAR project, that also includes links for downloading two further documents: one providing information on CVD risk factors and the other on the 5As “Ask, Assess, Advise, Assist, Arrange” clinical intervention, recommended for promoting healthy lifestyles.

- Patient information sheet on cholesterol levels (i-botika: “Cholesterol levels are not the only thing”, developed in the framework of this project, providing information on high cholesterol levels and their role together with other risk factors associated with CVD)

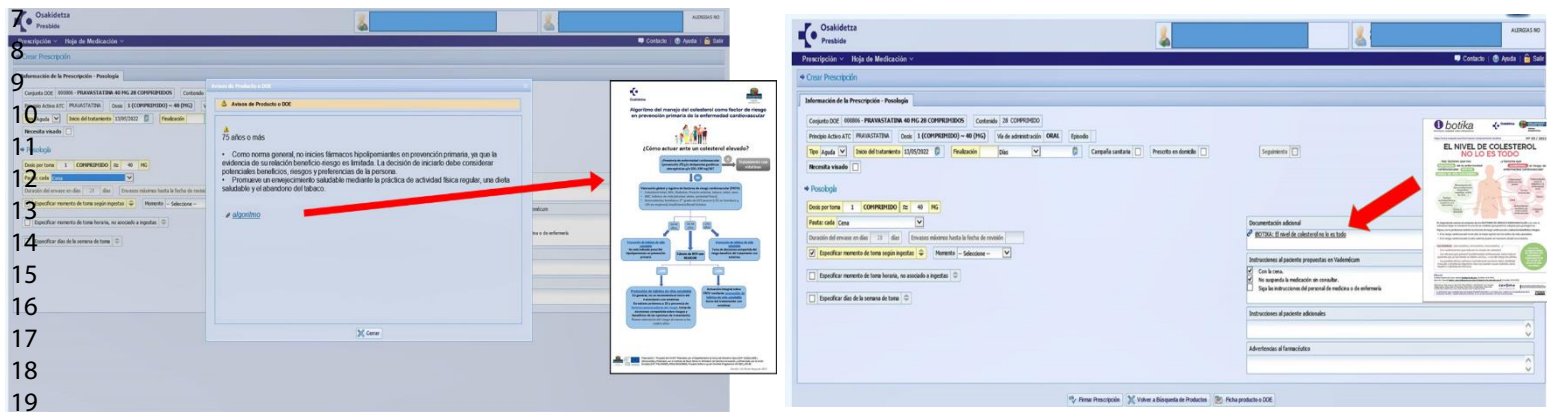

Figure 2. a). Pop-up reminder in the PRESBIDE software with recommendations on the prescribing of statins in people  $\geq 75$  years old that includes a link to the “Management of cholesterol as a risk factor in primary prevention of cardiovascular disease” algorithm, b) PRESBIDE form for prescribing statins, with a link to the patient information sheet (i-botika).

### 1.3. Objectives: *Determinant - What needs to change*

#### Pop-up alerts, reminders, and an algorithm

##### Cognitive and interpersonal skills:

- ✓ Enhance skills to enable appropriate prescribing of statins based on clinical practice recommendations

##### Attention, memory, and decision-making processes:

- ✓ Promote recall of recommended clinical practice in the primary prevention of CVD, reducing the impact of therapeutic inertia

##### Context and resources:

- ✓ Develop support systems in the EHR as reminders of and to promote the practices recommended in CPGs for the primary prevention of CVD (avoiding statins and encouraging healthy lifestyles)
- ✓ Restrict or impede inappropriate prescribing of statins due to clinical prescribing behavior driven by simplicity and speed

##### Emotion/Reinforcement:

- ✓ Reduce the likelihood of inappropriate prescribing due to habit, routine, or inertia (to “treat” cholesterol), through the experiencing of negative emotions when going against the recommended practice and this is made evident by alerts

#### Patient information sheet

##### Social influence (patient involvement):

- ✓ Increase patient awareness of the problems associated with the inappropriate prescribing of statins: risks vs benefits
- ✓ Increase patient knowledge of the criteria and courses of action recommended in CPGs (concerning cholesterol, CVD, and CVR)

## 1.4. Choice architecture techniques

### A. Decision Information

**A1. Translate information:** change the format or presentation of information but not the content.

**Reframe:** present the (same) information in several ways, e.g., Presenting the contents of CPGs in several different ways (i.e., text within alerts, in the form of an algorithm, etc.).

**Simplify:** reduce the burden of cognitive effort necessary to process the information available and increase its usefulness in the decision-making process, e.g., algorithm.

**A2. Make information visible:** make necessary information readily accessible.

**Make external information visible:** make decision-relevant information visible, e.g., text within alerts recalling the CPGs.

### B. Decision structure

#### B1. Change choice defaults

**Prompted choice:** avoid the status quo bias or default effects because of inertia or assumed recommendations, e.g., pop-up alerts.

**B2. Change option-related effort:** change physical effort.

**Increase physical effort:** e.g., pop-up alerts.

### C. Decision assistance

**C1. Provide reminders:** provide positive reminders that heighten the salience of a desired option and/or diminish the salience of an undesired option, e.g., Pop-up alerts with the recommendation to not prescribe statins.

## 1.5. Exposure

- “Lighthouse” guiding alert in the REGICOR CVR calculator: by clicking to “save” the result after estimating CVR
- Alerts in PRESBIDE: by starting to prescribe statins or clicking on the links to the algorithm or the patient information sheet



## 2. Strategy - Reflective/non-reflective decision information strategy

Corporate campaign entitled “Stopping low-value prescribing” (in Spanish: “*Abandono de prescripciones farmacológicas de escaso valor*”), promoted through a knowledge dissemination strategy based on circulars and notifications (e.g., mass mailing and internal newsletters) concerning content, informative material and documents on recommended clinical practice and improving the appropriateness and/or optimization in prescribing drug treatments, including that of statins for the primary prevention of CVD, made available to FPs on the corporate intranets of the Ezkerraldea-Enkarterri-Cruces (EEC) and Barakaldo-Sestao (BS) IHOs, part of the Basque Health Service (Osakidetza).

### 2.1. Target audience

This strategy targets all FPs from the EEC and BS IHOs, who will also be exposed to the first strategy, namely, non-reflective decision assistance.

### 2.2. Active components (actions) of the intervention

- Adherence to and implementation of best practice pages on the EEC and BS IHO intranets which have dedicated sections focused on improving the appropriateness of the use of statins providing easy access to the CPGs and recommended practice for the primary prevention of CVD.



Figure 3. Main page of the adherence to and implementation of best practice (“*Adecuación e Implementación de Buenas Prácticas*”) section on the Ezkerraldea-Enkarterri-Cruces Integrated Healthcare Organization intranet and main page of the dedicated “Stopping inappropriate prescribing of statins for the primary prevention of cardiovascular disease” section. Equivalent pages were also created on the Barakaldo-Sestao Integrated Healthcare Organization intranet.

- Corporate dissemination campaign: activities aimed at attracting FPs to the pages created on the EEC and BS IHO intranets, in order that they access the information and documents available
  - News story on the launch of the campaign with links to the pages on the corporate intranets, e.g.,



Figure 4. News story published on the Ezkerraldea-Enkarterri-Cruces Integrated Healthcare Organization intranet to announce the launch of the corporate “Stopping low-value prescribing” campaign and the development of pages on its intranet and that of the Barakaldo-Sestao Integrated Healthcare Organization, on May 5, 2022. The story was also published on the Barakaldo-Sestao Integrated Healthcare Organization intranet.

- **Monthly newsletter:** reporting of the launch of the campaign in the monthly newsletter circulated by the BS IHO to all its employees
- **Mass mailing** on the launch of the campaign with links to the pages on the corporate intranets
- **Revitalization of the corporate campaign:** periodic publication of news stories on the EEC and BS IHO intranets with content related to the campaign informing FPs of the updating of content/informative materials (for example, any changes in the recommendations in CPGs and INFAC [pharmacotherapy information] newsletters) on the dedicated pages on the intranets of both IHOs, aimed at improving the appropriateness of the use of statins in primary prevention of CVD, including links to these pages.
- **Justification email** from the Healthcare Management of the Basque Health Service, telling all FPs about the initiatives being put in place to improve the approach to the prevention of CVD, improving the appropriateness of statin prescribing, and encouraging the provision of healthy lifestyle advice, among other components.

### 2.3. Objectives: Determinant - *What needs to change*

#### Knowledge:

- ✓ Increase awareness of the problem of the inappropriate prescribing of statins
- ✓ Increase knowledge of the CPGs on the primary prevention of CVD, in particular, the appropriate or recommended care as a function of the estimated CVR
- ✓ Provide evidence-based standardized and up-to-date clinical guidelines

#### Behavior regulation:

- ✓ Encourage reflection on practice/performance in relation to inappropriate prescribing of statins in the primary prevention of CVD

#### Beliefs about capabilities:

- ✓ Strengthen the belief that the prescribing of statins is not as straightforward and safe as might be thought
- ✓ Strengthen the belief that statin treatment is not easy for patients (dosage)

Beliefs about consequences:

- ✓ Strengthen the belief that not prescribing statins for the primary prevention of CVD is not the same as “not treating”.
- ✓ Strengthen the belief that statins are not more effective in reducing cardiovascular events than healthy lifestyle promotion in the primary prevention of CVD
- ✓ Strengthen the belief that statins, in the primary prevention of CVD, may have adverse effects and are not risk-free.

Professional/social role and identity:

- ✓ Foster the belief that appropriate primary prevention of CVD is considered important at the organizational level and among peers.
- ✓ Strengthen understanding that the role of FPs goes beyond that of prescribing drugs.

Social influence:

- ✓ Increase awareness of the organizational goals for reducing inappropriate prescribing of statins in the primary prevention of CVD.
- ✓ Increase patient awareness of the problems associated with the inappropriate prescribing of statins: risks vs benefits
- ✓ Increase patient knowledge of the criteria and recommended courses of action (concerning cholesterol, CVD, and CVR)

Emotion/reinforcement:

- ✓ Reduce the likelihood of inappropriate prescribing due to habit, routine, or inertia (to “treat” cholesterol), through the experiencing of negative emotions when going against the recommended clinical practice and this is made evident by alerts.

Cognitive and interpersonal skills:

- ✓ Enhance skills to enable the appropriate prescribing of statins based on CPGs.

**2.4. Choice architecture techniques****A. Decision Information**

**A1. Translate Information:** change the format or presentation of information but not the content.

**Reframe:** present the (same) information in several ways, e.g., clinical guidelines, algorithm, patient information leaflet.

**Simplify:** reduce the burden of cognitive effort necessary to process the information available and increase its usefulness in the decision-making process, e.g., algorithm.

**A2. Make information visible:** make necessary information readily accessible.

**Make external information visible:** make decision-relevant information visible, e.g., Links about inappropriate statin prescription in the Basque Health Service (Osakidetza), adverse effects of statins and cholesterol treatment, and promotion of the campaign through emails and news.

**A3. Provide social reference point:** influence decision-making through other’s behavior.

**Refer to descriptive norm:** depict the observable behavior of other people to impact on the decision-making process, e.g., links about inappropriate statin prescription in the Basque Health Service (Osakidetza).

**Refer to opinion leader:** use them as information disseminators to improve the impact of the campaign, e.g., Setting of goals in an email sent by an opinion leader, using the source as much as the content of the message to improve the impact of the campaign.

**B. Decision structure**

**B2. Change option-related effort:** modify the physical or financial effort involved in the decision-making process.

**Change physical effort,** e.g., decreasing physical effort by making all theme-related information accessible on the same website and including links to the website in the text of emails and news stories.

### C. Decision assistance

**C1. Provide reminders:** provide positive reminders that heighten the salience of a desired option and/or diminish the salience of an undesired option, e.g., links to clinical guidelines with recommended practice about CVD primary prevention, and information about adverse effects of statins.

### 2.5. Exposure

- By accessing the pages of the EEC and BS IHO corporate intranet and clicking on the links to the CPGs, INFAC newsletters, i-botika patient information sheets, recommendations, etc. available in the dedicated “Stopping inappropriate prescribing of statins for the primary prevention of cardiovascular disease” section
- By accessing the news section on the dedicated pages on the intranets of EEC and BS IHOs

### 3. Strategy - Reflective decision structure strategy

Sending of regular personalized *Audit & Feedback (A&F)* reports with practice- and organizational-level performance indicators of the FPs regarding inappropriate prescribing of statins and healthy lifestyle promotion in the primary prevention of CVD in low-risk patients in the Basque Health Service

#### 3.1. Target audience

This strategy targets a randomly selected set of FPs from the EEC and BS IHOs, who will also be exposed to the previously described interventions, namely, *non-reflective decision assistance and decision information*.

#### 3.2. Active components (actions) of the intervention

- Informative email concerning the sending of A&F reports, including the possibility to opt out: email with information for primary care FPs of the EEC and BS IHOs on the sending of regular personalized A&F reports, in the framework of the corporate campaign, with the goal of encouraging adherence to recommendations and stopping inappropriate prescribing of statins
- A&F reports mailing: periodic A&F reports with indicators describing global performance across the Basque Health Service: a) rate of new potentially inappropriate prescribing of statins to people without CVD and with REGICOR CVR scores <7.5% and practice in the promotion of healthy habits in these patients; b) rate of documentation of CVR (in the 2 years before the prescription date) in all 40- to 75-year-olds with no clinical history of CVR who are newly prescribed statins. Future A&F reports are expected to contain a link to a short voluntary exercise on goal setting for improving the appropriateness of statin prescribing for the primary prevention of CVD



Figure 5. Draft of the Audit & Feedback report with practice- and organizational-level performance indicators of the family physicians regarding inappropriate prescribing of statins and healthy lifestyle promotion in the primary prevention of cardiovascular disease in low-risk patients in the Basque Health Service

### 3.3. Objectives: Determinant - What needs to change

#### Knowledge:

- ✓ Increase awareness of the problem of the inappropriate prescribing of statins

#### Behavior regulation:

- ✓ Make data available on inappropriate prescribing of statins for the primary prevention of CVD
- ✓ Provide tools for the setting of clear specific goals, at personal and organizational levels, regarding the reduction of inappropriate prescribing of statins for the primary prevention of CVD

#### Active reflection on personal practice:

- ✓ Encourage further reflection on practice/performance in relation to inappropriate prescribing of statins for the primary prevention of CVD

#### Intentions:

- ✓ Reduce the intention to prescribe statins inappropriately and increase the intention to promote healthy lifestyles for the primary prevention of CVD

#### Goals:

- ✓ Encourage commitment to practice in the primary prevention of CVD that is in accordance with recommendations
- ✓ Increase the motivation to promote healthy lifestyles in the primary prevention of CVD

#### Beliefs about capabilities:

- ✓ Strengthen self-efficacy and enhance the skills required for promoting healthy lifestyles

#### Emotion:

- ✓ Strengthen self-confidence about not prescribing statins for the primary prevention of CVD
- ✓ Foster belief in the safety of and trust in the courses of action recommended in the guidelines
- ✓ Experience a negative emotion after inappropriate prescribing

#### Professional/social role and identity:

- ✓ Foster the belief that appropriate primary prevention of CVD is considered important at the organizational level and among peers
- ✓ Strengthen understanding that the role of FPs goes beyond prescribing drugs

#### Reinforcement:

- ✓ Generate positive/negative reinforcement related to good/poor performance in the primary prevention of CVD.

### 3.4. Choice architecture techniques

#### **A. Decision Information**

**A1. Translate Information:** change the format or presentation of information but not the content.

**Simplify:** reduce the burden of cognitive effort necessary to process the information available and increase its usefulness in the decision-making process, e.g., presenting prescription rate data in a simple, user-friendly way, namely, on a dashboard.

**A2. Make information visible:** make necessary information readily accessible.

**Make own behavior visible:** feedback.

**Make external information visible:** make decision-relevant information visible, e.g., showing the prescription rates of other FPs and other IHOs.

**A3. Provide social reference point:** influence decision-making through the behavior of others.

**Refer to descriptive norm:** depict the observable behavior of other people to impact on the decision-making process, e.g., showing other FPs' prescribing behavior.

1  
2  
3  
4 **B. Decision structure**

5 **B2. Change opinion-related effort:** modify the physical or financial effort involved in the  
6 decision-making process.

7 **Decrease physical effort:** collect all prescribing data in one file, e.g., dashboard.  
8

9  
10 **C. Decision assistance**

11 **C2. Facilitate commitment:** overcome constrained self-control and bridge the intention-  
12 behavior gap.

13 **Support self-commitment:** arrange with the aim of helping fulfill a plan, e.g., self-commitment  
14 questionnaire  
15

16  
17 **3.5. Exposure**

18 By opening the A&F reports received by email.  
19  
20  
21  
22  
23  
24  
25  
26  
27  
28  
29  
30  
31  
32  
33  
34  
35  
36  
37  
38  
39  
40  
41  
42  
43  
44  
45  
46  
47  
48  
49  
50  
51  
52  
53  
54  
55  
56  
57  
58  
59  
60

## Annex I. GLOSSARY OF TERMS

**1. De-implementation:** De-implementation is defined as the process of reducing or abandoning the use of guidelines practices, interventions or policies that are found to be ineffective, are not proven to be effective, do not have adequate scientific support, are less effective or less cost-effective than an alternative one, are potentially harmful to patients, or that represent low-value care.

**2. Implementation:** Implementation (commonly defined as “to do”), in the context of Implementation Science refers to the actively designed process of putting into practice or integrating evidence-based interventions (e.g., practice, program, policy,...) within a specific real-world setting.

**3. Theoretical Domains Framework (TDF):** The Theoretical Domains Framework (TDF) is an integrative framework developed from a synthesis of psychological theories as a vehicle to help apply theoretical approaches to interventions aimed at behavior change. The TDF comprises of 14 domains and 84 constructs that allows synthesis of a multitude of coherent behavior change theories into a single framework that allows assessment and explanation of behavioral problems and associated barriers and enablers, and inform the design of appropriately targeted interventions.

References:

1. Michie S, Johnston M, Abraham C, et al. Making psychological theory useful for implementing evidence based practice: a consensus approach. *Qual Saf Health Care*. 2005;14(1):26-33. doi:10.1136/qshc.2004.011155.
2. Cane J, O'Connor D, Michie S. Validation of the theoretical domains framework for use in behaviour change and implementation research. *Implement Sci*. 2012;7:37. doi:10.1186/1748-5908-7-37.
3. Atkins L, Francis J, Islam R, et al. A guide to using the Theoretical Domains Framework of behaviour change to investigate implementation problems. *Implement Sci*. 2017;12(1):77. doi: 10.1186/s13012-017-0605-9.

**4. Behavior Change Wheel (BCW):** The Behavior Change Wheel (BCW) is a theory- and evidence-based tool that provides a process for designing or refining behavior change interventions and policies. Its purpose is to promote a systematic and comprehensive analysis of behavior in its context to guide change. It can be used to identify the interventions and policies likely to be effective in changing behavior.

Reference:

1. Michie S, van Stralen MM, West R. The behaviour change wheel: a new method for characterising and designing behaviour change interventions. *Implement Sci*. 2011 23;6:42. Published 2011 Apr 23. doi:10.1186/1748-5908-6-42.

**5. Statin:** Statins, also known as HMG-CoA reductase inhibitors, are a class of lipid-lowering medications that are used to lower blood low-density lipoprotein (LDL) cholesterol levels.

**6. Non-reflective:** Non-reflective processes, such as habits and routines, are defined as those factors that bypass conscious deliberation and so generate actions fast, effortlessly, automatically and with little deliberation and awareness.

**7. Reflective:** Reflective processes involves conscious deliberation over situational demands, available options and/or outcome expectancies; and therefore generate slow and effortful actions or behaviors via reasoned intentions.



## 8. Decision assistance strategy. Decision information strategy. Decision structure strategy

According to the taxonomy suggested by Münscher et al., there are three broad categories of choice architecture intervention techniques: decision information, decision structure, and decision assistance (Münscher et al., 2016).

- i) **Decision information** interventions aim to facilitate access to decision-relevant information without altering the options themselves by increasing its availability, comprehensibility, and/or personal relevance to the decision maker. There are several ways of achieving it, such as (re)arranging existing information or changing its presentation/format, providing social reference point, etc.
- ii) **Decision structure** interventions target the way in which the choice options are organized and structured through the arrangement of choice alternatives and the format of decision making, which includes setting default options, rearranging their composition, and changing option-related efforts or consequences of selecting it.
- iii) **Decision assistance** interventions aim to bridge the intention–behavior gap by reinforcing self-regulation by providing decision makers with further assistance to help them follow through with their intentions. To do so, examples of decision assistance interventions techniques include provision of reminders of the desirable behavioral option as well as facilitating deliberate commitment to beneficial actions.

### References:

1. Münscher R, Vetter M, Scheuerle T. A review and taxonomy of choice architecture techniques. *J Behav Decis Mak.* 2016;29(5):511-24. doi.org/10.1002/bdm.1897.
2. Mertens S, Herberz M, Hahnel UJJ, Brosch T. The effectiveness of nudging: A meta-analysis of choice architecture interventions across behavioral domains. *Proc Natl Acad Sci USA.* 2022;119(1):e2107346118. doi: 10.1073/pnas.2107346118. Erratum in: *Proc Natl Acad Sci USA.* 2022;119(19):e2204059119.

**9. Audit & feedback (A&F):** Audit and feedback is a strategy that aims to encourage individuals to change their practice and improve their performance. In the audit process, an individual's professional practice or performance is assessed and monitored based on specific, pre-defined criteria or standards. Then, the results of the comparison is fed back to the individual in a structured manner.



## ***Hoja de Información al Profesional de la salud y Consentimiento Informado***

**Título:** Efectividad de estrategias de de-implementación para favorecer el abandono de prescripciones farmacológicas de bajo valor en prevención primaria de la ECV: proyecto De-imFAR Fase II

**Investigador Principal:** Álvaro Sánchez Pérez

**Servicio/Centro:** Subdirección para la coordinación de atención primaria/Unidad de investigación atención primaria-IIS Biocruces Bizkaia

**Entidad financiadora:** Instituto de salud Carlos III

Apreciado Sr./a,

Osakidetza-Servicio Vasco de Salud, con el propósito de mejorar la calidad en la prestación de servicios de salud hacia la ciudadanía, le invita a participar en el estudio “Efectividad de estrategias de de-implementación para favorecer el abandono de prescripciones farmacológicas de bajo valor en prevención primaria de la ECV: proyecto De-imFAR Fase II”.

Antes de decidir si desea participar, es importante que entienda los objetivos, la importancia de su participación y en qué consistirá, además de qué uso se dará a los datos recogidos y los posibles beneficios y riesgos.

Léalo atentamente y consulte cualquier duda con los miembros del equipo de investigación.



## 1. OBJETO DEL GRUPO DE DISCUSIÓN

El objetivo de los grupos de discusión del Proyecto De-ImFAR es generar conocimiento –a través de las percepciones de los/las profesionales de medicina de atención primaria- sobre la práctica clínica en prevención primaria de eventos cardiovasculares en pacientes de bajo riesgo. A través de una serie de preguntas abiertas se analizarán diferentes aspectos relacionados con el manejo del riesgo cardiovascular en estos pacientes, tratando de conocer la opinión de todos los integrantes del grupo sobre este tema.

No existen respuestas buenas o malas. Cualquier integrante del grupo está invitado a expresar libremente su opinión y a respetar la de los otros integrantes, aunque sea diferente de la suya.

## 2. PARTICIPACIÓN Y RETIRADA DEL ESTUDIO

Este estudio está aprobado por el Comité de Ética de la Investigación con Medicamentos de Euskadi (CEIm-E). Su participación en el mismo es voluntaria y en cualquier momento puede decidir abandonarlo, aunque haya proporcionado el consentimiento y el estudio esté en pleno desarrollo. Además, usted tiene derecho a solicitar al equipo investigador del estudio, en cualquier momento, y sin necesidad de especificar el motivo, la eliminación de sus datos.

## 3. DESARROLLO DEL ESTUDIO

Se realizará una sola entrevista llevada a cabo por dos investigadores con experiencia en métodos de investigación cualitativa, así como en el campo clínico y el proyecto. En dicha entrevista se le harán preguntas sobre su percepción y adaptación a las intervenciones implantadas. La discusión grupal será grabada (en formato audio) con el fin de transcribirla íntegramente. Esto permite a los miembros del equipo participar en la discusión sin necesidad de tomar notas, evitándose así el riesgo de no reflejar fidedignamente las opiniones expresadas por los miembros del grupo.



#### 4. USO Y CONFIDENCIALIDAD DE LOS DATOS

Los datos que se obtengan en el grupo de discusión se utilizarán únicamente con fines de investigación y solamente por parte del equipo de investigación de la Unidad de Investigación de Atención Primaria de Bizkaia (UIAPB). Todas las opiniones expresadas por los/las participantes serán tratadas de manera anónima y confidencial. Se le informa de que no se va a recoger ningún dato de carácter personal.

El estudio cumple lo establecido en el REGLAMENTO (UE) 2016/679 DEL PARLAMENTO EUROPEO Y DEL CONSEJO de 27 de abril de 2016 relativo a la protección de las personas físicas en lo que respecta al tratamiento de datos personales y a la libre circulación de estos datos. Se le solicita también su consentimiento para la realización de este proyecto de investigación conforme a las exigencias del Reglamento Europeo 2016/679 de Protección de Datos y a la Ley Orgánica 3/2018, de 5 de diciembre, de Protección de Datos Personales y garantía de los derechos digitales que deroga la Ley Orgánica 15/1999, de 5 de diciembre, de protección de datos personales. No se cederán datos a terceros, salvo obligación legal.

Para contactar con los responsables del estudio puede dirigirse a:

**Nombre:** Álvaro Sánchez Pérez

**Teléfono:** 946006673

**e-mail:** [alvaro.sanchezperez@osakidetza.eus](mailto:alvaro.sanchezperez@osakidetza.eus)

**Dirección:** Edificio Biocruces 3, Plaza Cruces 12, 48903



5. DECLARACION DEL CONSENTIMIENTO INFORMADO

Título: Efectividad de estrategias de de-implementación para favorecer el abandono de prescripciones farmacológicas de bajo valor en prevención primaria de la ECV: proyecto De-imFAR Fase II

Investigador Principal: Álvaro Sánchez Pérez

Servicio/Centro: Subdirección para la coordinación de atención primaria/Unidad de investigación atención primaria-IIS Biocruces Bizkaia

Yo, Don/Doña....., Médico/a de Atención Primaria del Centro de Salud....., he leído este documento, he comprendido las explicaciones en él facilitadas acerca de la grabación del grupo de discusión y he podido resolver todas las preguntas que he planteado al respecto. Comprendo que mi participación en este ensayo es voluntaria y que puedo retirarme en cualquier momento.

También he sido informado/a de que mis datos personales serán protegidos y serán utilizados únicamente con fines de investigación por el equipo de investigadores de la Unidad de Investigación de Atención Primaria de Bizkaia (UIAPB).

Tomando todo ello en consideración y en tales condiciones, CONSIENTO participar en el grupo de discusión, en la grabación del mismo y en que los datos que se deriven de mi participación sean utilizados para cubrir los objetivos especificados en el documento.

EN CONSECUENCIA, DOY MI CONSENTIMIENTO PARA PARTICIPAR EN ESTE PROYECTO DE INVESTIGACIÓN.

..... Firma del/la médico ..... Firma del/la responsable del proyecto

..... Nombre y apellidos ..... Nombre y apellidos

Fecha ...../...../20..... Fecha ...../...../20.....



## ***Hoja de Información al Paciente y Consentimiento Informado***

**Título:** Efectividad de estrategias de de-implementación para favorecer el abandono de prescripciones farmacológicas de bajo valor en prevención primaria de la ECV: proyecto De-imFAR Fase II

**Investigador Principal:** Álvaro Sánchez Pérez

**Servicio/Centro:** Subdirección para la coordinación de atención primaria/Unidad de investigación atención primaria-IIS Biocruces Bizkaia

**Entidad financiadora:** Instituto de salud Carlos III

Apreciado Sr./a,

Osakidetza-Servicio Vasco de Salud, con el propósito de mejorar la calidad en la prestación de servicios de salud hacia la ciudadanía, le invita a participar en el estudio “Efectividad de estrategias de de-implementación para favorecer el abandono de prescripciones farmacológicas de bajo valor en prevención primaria de la ECV: proyecto De-imFAR Fase II”.

Antes de decidir si desea participar, es importante que entienda los objetivos, la importancia de su participación y en qué consistirá, además de qué uso se dará a los datos recogidos y los posibles beneficios y riesgos.

Léalo atentamente y consulte cualquier duda con los miembros del equipo de investigación.



## 1. OBJETO DEL GRUPO DE DISCUSIÓN

El objetivo de los grupos de discusión del Proyecto De-ImFAR es generar conocimiento –a través de las percepciones de los/las pacientes de atención primaria- sobre la práctica clínica en prevención primaria de eventos cardiovasculares en pacientes de bajo riesgo. A través de una serie de preguntas abiertas se analizarán diferentes aspectos relacionados con la experiencia percibida por los/las pacientes con la atención recibida, tratando de conocer la opinión de todos los integrantes del grupo sobre este tema.

No existen respuestas buenas o malas. Cualquier integrante del grupo está invitado a expresar libremente su opinión y a respetar la de los otros integrantes, aunque sea diferente de la suya.

## 2. PARTICIPACIÓN Y RETIRADA DEL ESTUDIO

Este estudio está aprobado por el Comité de Ética de la Investigación con Medicamentos de Euskadi (CEIm-E). Su participación en el mismo es voluntaria y en cualquier momento puede decidir abandonarlo, aunque haya proporcionado el consentimiento y el estudio esté en pleno desarrollo. Su decisión no afectará la atención sanitaria que reciba posteriormente. Además, usted tiene derecho a solicitar al equipo investigador del estudio, en cualquier momento, y sin necesidad de especificar el motivo, la eliminación de sus datos. Su participación en este estudio no supondrá para usted ningún coste económico, así como tampoco será recompensado económicamente por ello.

## 3. DESARROLLO DEL ESTUDIO

Se realizará una sola entrevista llevada a cabo por dos investigadores con experiencia en métodos de investigación cualitativa, así como en el campo clínico y el proyecto. En dicha entrevista se le harán preguntas sobre su experiencia y satisfacción con el servicio recibido en prevención primaria de eventos cardiovasculares.

La discusión grupal será grabada (en formato audio) con el fin de transcribirla íntegramente. Esto permite a los miembros del equipo participar en la discusión sin necesidad de tomar notas, evitándose así el riesgo de no reflejar fidedignamente las opiniones expresada por los miembros del grupo.



#### 4. USO Y CONFIDENCIALIDAD DE LOS DATOS

Los datos que se obtengan en el grupo de discusión se utilizarán únicamente con fines de investigación y solamente por parte del equipo de investigación de la Unidad de Investigación de Atención Primaria de Bizkaia (UIAPB). Todas las opiniones expresadas por los/las participantes serán tratadas de manera anónima y confidencial. Se le informa de que no se va a recoger ningún dato de carácter personal.

El estudio cumple lo establecido en el REGLAMENTO (UE) 2016/679 DEL PARLAMENTO EUROPEO Y DEL CONSEJO de 27 de abril de 2016 relativo a la protección de las personas físicas en lo que respecta al tratamiento de datos personales y a la libre circulación de estos datos. Se le solicita también su consentimiento para la realización de este proyecto de investigación conforme a las exigencias del Reglamento Europeo 2016/679 de Protección de Datos y a la Ley Orgánica 3/2018, de 5 de diciembre, de Protección de Datos Personales y garantía de los derechos digitales que deroga la Ley Orgánica 15/1999, de 5 de diciembre, de protección de datos personales. No se cederán datos a terceros, salvo obligación legal.

Si usted tiene alguna duda o requiere cualquier tipo de información no dude en contactar con el/la médico que le informa, Dr./a \_\_\_\_\_, cuyo lugar de trabajo es el Servicio de \_\_\_\_\_ del Hospital Universitario \_\_\_\_\_; teléfono: \_\_\_\_\_ (extensión \_\_\_\_\_).

Usted también puede contactar con el Investigador Principal responsable:

**Nombre:** Álvaro Sánchez Pérez

**Teléfono:** 946006673

**e-mail:** [alvaro.sanchezperez@osakidetza.eus](mailto:alvaro.sanchezperez@osakidetza.eus)

**Dirección:** Edificio Biocruces 3, Plaza Cruces 12, 48903





## 5. DECLARACION DEL CONSENTIMIENTO INFORMADO

**Título:** Efectividad de estrategias de de-implementación para favorecer el abandono de prescripciones farmacológicas de bajo valor en prevención primaria de la ECV: proyecto De-imFAR Fase II

**Investigador Principal:** Álvaro Sánchez Pérez

Investigador/a médico/a:.....

**Servicio/Centro:** Subdirección para la coordinación de atención primaria/Unidad de investigación atención primaria-IIS Biocruces Bizkaia

Yo, Don/Doña.....(nombre y apellidos del paciente),

he leído este documento, he comprendido las explicaciones en él facilitadas acerca de la grabación del grupo de discusión y he podido resolver todas las preguntas que he planteado al respecto. Comprendo que mi participación en este ensayo es voluntaria y que puedo retirarme en cualquier momento.

También he sido informado/a de que mis datos personales serán protegidos y serán utilizados únicamente con fines de investigación por el equipo de investigadores de la Unidad de Investigación de Atención Primaria de Bizkaia (UIAPB).

Tomando todo ello en consideración y en tales condiciones, CONSIENTO participar en el grupo de discusión, en la grabación del mismo y en que los datos que se deriven de mi participación sean utilizados para cubrir los objetivos especificados en el documento.

**EN CONSECUENCIA, DOY MI CONSENTIMIENTO PARA PARTICIPAR EN ESTE PROYECTO DE INVESTIGACIÓN.**

.....

.....

Firma del/la paciente

Firma del/la médico responsable

.....

.....

Nombre y apellidos

Nombre y apellidos

Fecha ...../...../20.....

Fecha ...../...../20.....

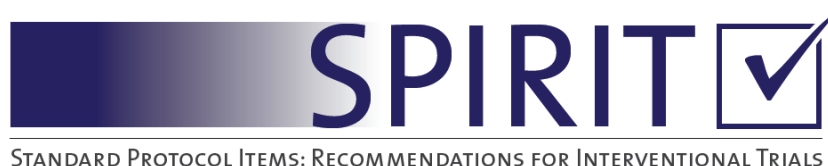

SPIRIT 2013 Checklist: Recommended items to address in a clinical trial protocol and related documents\*

| Section/item                      | Item No | Description                                                                                                                                                                                                                                                                              | Addressed on page number |
|-----------------------------------|---------|------------------------------------------------------------------------------------------------------------------------------------------------------------------------------------------------------------------------------------------------------------------------------------------|--------------------------|
| <b>Administrative information</b> |         |                                                                                                                                                                                                                                                                                          |                          |
| Title                             | 1       | Descriptive title identifying the study design, population, interventions, and, if applicable, trial acronym                                                                                                                                                                             | 1                        |
| Trial registration                | 2a      | Trial identifier and registry name. If not yet registered, name of intended registry                                                                                                                                                                                                     | 4                        |
|                                   | 2b      | All items from the World Health Organization Trial Registration Data Set                                                                                                                                                                                                                 | N/A                      |
| Protocol version                  | 3       | Date and version identifier                                                                                                                                                                                                                                                              | 19                       |
| Funding                           | 4       | Sources and types of financial, material, and other support                                                                                                                                                                                                                              | 24                       |
| Roles and responsibilities        | 5a      | Names, affiliations, and roles of protocol contributors                                                                                                                                                                                                                                  | 1-2                      |
|                                   | 5b      | Name and contact information for the trial sponsor                                                                                                                                                                                                                                       | 2                        |
|                                   | 5c      | Role of study sponsor and funders, if any, in study design; collection, management, analysis, and interpretation of data; writing of the report; and the decision to submit the report for publication, including whether they will have ultimate authority over any of these activities | 25                       |
|                                   | 5d      | Composition, roles, and responsibilities of the coordinating centre, steering committee, endpoint adjudication committee, data management team, and other individuals or groups overseeing the trial, if applicable (see Item 21a for data monitoring committee)                         | N/A                      |
| <b>Introduction</b>               |         |                                                                                                                                                                                                                                                                                          |                          |
| Background and rationale          | 6a      | Description of research question and justification for undertaking the trial, including summary of relevant studies (published and unpublished) examining benefits and harms for each intervention                                                                                       | 5-7                      |
|                                   | 6b      | Explanation for choice of comparators                                                                                                                                                                                                                                                    | 7-8                      |
| Objectives                        | 7       | Specific objectives or hypotheses                                                                                                                                                                                                                                                        | 8-9                      |
| Trial design                      | 8       | Description of trial design including type of trial (eg, parallel group, crossover, factorial, single group), allocation ratio, and framework (eg, superiority, equivalence, noninferiority, exploratory)                                                                                | 9, 12-13                 |

## Methods: Participants, interventions, and outcomes

|                      |     |                                                                                                                                                                                                                                                                                                                                                                                |       |
|----------------------|-----|--------------------------------------------------------------------------------------------------------------------------------------------------------------------------------------------------------------------------------------------------------------------------------------------------------------------------------------------------------------------------------|-------|
| Study setting        | 9   | Description of study settings (eg, community clinic, academic hospital) and list of countries where data will be collected. Reference to where list of study sites can be obtained                                                                                                                                                                                             | 10    |
| Eligibility criteria | 10  | Inclusion and exclusion criteria for participants. If applicable, eligibility criteria for study centres and individuals who will perform the interventions (eg, surgeons, psychotherapists)                                                                                                                                                                                   | 10    |
| Interventions        | 11a | Interventions for each group with sufficient detail to allow replication, including how and when they will be administered                                                                                                                                                                                                                                                     | 12    |
|                      | 11b | Criteria for discontinuing or modifying allocated interventions for a given trial participant (eg, drug dose change in response to harms, participant request, or improving/worsening disease)                                                                                                                                                                                 | N/A   |
|                      | 11c | Strategies to improve adherence to intervention protocols, and any procedures for monitoring adherence (eg, drug tablet return, laboratory tests)                                                                                                                                                                                                                              | N/A   |
|                      | 11d | Relevant concomitant care and interventions that are permitted or prohibited during the trial                                                                                                                                                                                                                                                                                  | N/A   |
| Outcomes             | 12  | Primary, secondary, and other outcomes, including the specific measurement variable (eg, systolic blood pressure), analysis metric (eg, change from baseline, final value, time to event), method of aggregation (eg, median, proportion), and time point for each outcome. Explanation of the clinical relevance of chosen efficacy and harm outcomes is strongly recommended | 13-15 |
| Participant timeline | 13  | Time schedule of enrolment, interventions (including any run-ins and washouts), assessments, and visits for participants. A schematic diagram is highly recommended (see Figure)                                                                                                                                                                                               | N/A   |
| Sample size          | 14  | Estimated number of participants needed to achieve study objectives and how it was determined, including clinical and statistical assumptions supporting any sample size calculations                                                                                                                                                                                          | 17    |
| Recruitment          | 15  | Strategies for achieving adequate participant enrolment to reach target sample size                                                                                                                                                                                                                                                                                            | N/A   |

## Methods: Assignment of interventions (for controlled trials)

### Allocation:

|                     |     |                                                                                                                                                                                                                                                                                                                                                          |    |
|---------------------|-----|----------------------------------------------------------------------------------------------------------------------------------------------------------------------------------------------------------------------------------------------------------------------------------------------------------------------------------------------------------|----|
| Sequence generation | 16a | Method of generating the allocation sequence (eg, computer-generated random numbers), and list of any factors for stratification. To reduce predictability of a random sequence, details of any planned restriction (eg, blocking) should be provided in a separate document that is unavailable to those who enrol participants or assign interventions | 13 |
|---------------------|-----|----------------------------------------------------------------------------------------------------------------------------------------------------------------------------------------------------------------------------------------------------------------------------------------------------------------------------------------------------------|----|

|    |              |     |                                                                       |     |
|----|--------------|-----|-----------------------------------------------------------------------|-----|
| 1  | Allocation   |     | Mechanism of implementing the allocation sequence (eg, central        |     |
| 2  | concealment  | 16b | telephone; sequentially numbered, opaque, sealed envelopes),          | 13  |
| 3  | mechanism    |     | describing any steps to conceal the sequence until interventions are  |     |
| 4  |              |     | assigned                                                              |     |
| 5  |              |     |                                                                       |     |
| 6  | Implementati | 16c | Who will generate the allocation sequence, who will enrol             | 13  |
| 7  | on           |     | participants, and who will assign participants to interventions       |     |
| 8  |              |     |                                                                       |     |
| 9  | Blinding     |     | Who will be blinded after assignment to interventions (eg, trial      |     |
| 10 | (masking)    | 17a | participants, care providers, outcome assessors, data analysts), and  | 13  |
| 11 |              |     | how                                                                   |     |
| 12 |              |     |                                                                       |     |
| 13 |              |     |                                                                       |     |
| 14 |              | 17b | If blinded, circumstances under which unblinding is permissible, and  |     |
| 15 |              |     | procedure for revealing a participant's allocated intervention during | N/A |
| 16 |              |     | the trial                                                             |     |
| 17 |              |     |                                                                       |     |
| 18 |              |     |                                                                       |     |

### 19 **Methods: Data collection, management, and analysis**

|    |                 |     |                                                                          |       |
|----|-----------------|-----|--------------------------------------------------------------------------|-------|
| 21 | Data collection |     | Plans for assessment and collection of outcome, baseline, and            |       |
| 22 | methods         | 18a | other trial data, including any related processes to promote data        | 18    |
| 23 |                 |     | quality (eg, duplicate measurements, training of assessors) and a        |       |
| 24 |                 |     | description of study instruments (eg, questionnaires, laboratory         |       |
| 25 |                 |     | tests) along with their reliability and validity, if known. Reference to |       |
| 26 |                 |     | where data collection forms can be found, if not in the protocol         |       |
| 27 |                 |     |                                                                          |       |
| 28 |                 |     |                                                                          |       |
| 29 |                 | 18b | Plans to promote participant retention and complete follow-up,           | N/A   |
| 30 |                 |     | including list of any outcome data to be collected for participants      |       |
| 31 |                 |     | who discontinue or deviate from intervention protocols                   |       |
| 32 |                 |     |                                                                          |       |
| 33 | Data            |     | Plans for data entry, coding, security, and storage, including any       |       |
| 34 | management      | 19  | related processes to promote data quality (eg, double data entry;        | 18    |
| 35 |                 |     | range checks for data values). Reference to where details of data        |       |
| 36 |                 |     | management procedures can be found, if not in the protocol               |       |
| 37 |                 |     |                                                                          |       |
| 38 |                 |     |                                                                          |       |
| 39 | Statistical     |     | Statistical methods for analysing primary and secondary outcomes.        |       |
| 40 | methods         | 20a | Reference to where other details of the statistical analysis plan can    | 16-17 |
| 41 |                 |     | be found, if not in the protocol                                         |       |
| 42 |                 |     |                                                                          |       |
| 43 |                 | 20b | Methods for any additional analyses (eg, subgroup and adjusted           | 17    |
| 44 |                 |     | analyses)                                                                |       |
| 45 |                 |     |                                                                          |       |
| 46 |                 |     |                                                                          |       |
| 47 |                 | 20c | Definition of analysis population relating to protocol non-adherence     |       |
| 48 |                 |     | (eg, as randomised analysis), and any statistical methods to handle      | N/A   |
| 49 |                 |     | missing data (eg, multiple imputation)                                   |       |
| 50 |                 |     |                                                                          |       |
| 51 |                 |     |                                                                          |       |

### 52 **Methods: Monitoring**

|    |                 |     |                                                                         |     |
|----|-----------------|-----|-------------------------------------------------------------------------|-----|
| 54 | Data monitoring |     | Composition of data monitoring committee (DMC); summary of its          |     |
| 55 |                 | 21a | role and reporting structure; statement of whether it is independent    | N/A |
| 56 |                 |     | from the sponsor and competing interests; and reference to where        |     |
| 57 |                 |     | further details about its charter can be found, if not in the protocol. |     |
| 58 |                 |     | Alternatively, an explanation of why a DMC is not needed                |     |
| 59 |                 |     |                                                                         |     |
| 60 |                 |     |                                                                         |     |

|    |                                 |                                                                          |       |
|----|---------------------------------|--------------------------------------------------------------------------|-------|
| 1  |                                 | Description of any interim analyses and stopping guidelines,             |       |
| 2  | 21b                             | including who will have access to these interim results and make         | N/A   |
| 3  |                                 | the final decision to terminate the trial                                |       |
| 4  |                                 |                                                                          |       |
| 5  | Harms                           | Plans for collecting, assessing, reporting, and managing solicited       |       |
| 6  |                                 | and spontaneously reported adverse events and other unintended           | N/A   |
| 7  | 22                              | effects of trial interventions or trial conduct                          |       |
| 8  |                                 |                                                                          |       |
| 9  | Auditing                        | Frequency and procedures for auditing trial conduct, if any, and         |       |
| 10 |                                 | whether the process will be independent from investigators and the       | N/A   |
| 11 | 23                              | sponsor                                                                  |       |
| 12 |                                 |                                                                          |       |
| 13 |                                 |                                                                          |       |
| 14 |                                 |                                                                          |       |
| 15 | <b>Ethics and dissemination</b> |                                                                          |       |
| 16 | Research ethics                 | Plans for seeking research ethics committee/institutional review         |       |
| 17 | approval                        | board (REC/IRB) approval                                                 | 19    |
| 18 |                                 |                                                                          |       |
| 19 | Protocol                        | Plans for communicating important protocol modifications (eg,            |       |
| 20 | amendments                      | changes to eligibility criteria, outcomes, analyses) to relevant parties |       |
| 21 |                                 | (eg, investigators, REC/IRBs, trial participants, trial registries,      | N/A   |
| 22 | 25                              | journals, regulators)                                                    |       |
| 23 |                                 |                                                                          |       |
| 24 |                                 |                                                                          |       |
| 25 | Consent or                      | Who will obtain informed consent or assent from potential trial          |       |
| 26 | assent                          | participants or authorised surrogates, and how (see Item 32)             | 15,18 |
| 27 |                                 |                                                                          |       |
| 28 |                                 |                                                                          |       |
| 29 | 26b                             | Additional consent provisions for collection and use of participant      | N/A   |
| 30 |                                 | data and biological specimens in ancillary studies, if applicable        |       |
| 31 |                                 |                                                                          |       |
| 32 | Confidentiality                 | How personal information about potential and enrolled participants       |       |
| 33 |                                 | will be collected, shared, and maintained in order to protect            | 18    |
| 34 | 27                              | confidentiality before, during, and after the trial                      |       |
| 35 |                                 |                                                                          |       |
| 36 | Declaration of                  | Financial and other competing interests for principal investigators      |       |
| 37 | interests                       | for the overall trial and each study site                                | 25    |
| 38 |                                 |                                                                          |       |
| 39 | Access to data                  | Statement of who will have access to the final trial dataset, and        |       |
| 40 |                                 | disclosure of contractual agreements that limit such access for          | 19-20 |
| 41 | 29                              | investigators                                                            |       |
| 42 |                                 |                                                                          |       |
| 43 |                                 |                                                                          |       |
| 44 | Ancillary and                   | Provisions, if any, for ancillary and post-trial care, and for           |       |
| 45 | post-trial care                 | compensation to those who suffer harm from trial participation           | N/A   |
| 46 |                                 |                                                                          |       |
| 47 | Dissemination                   | Plans for investigators and sponsor to communicate trial results to      |       |
| 48 | policy                          | participants, healthcare professionals, the public, and other relevant   |       |
| 49 | 31a                             | groups (eg, via publication, reporting in results databases, or other    | 20    |
| 50 |                                 | data sharing arrangements), including any publication restrictions       |       |
| 51 |                                 |                                                                          |       |
| 52 |                                 |                                                                          |       |
| 53 | 31b                             | Authorship eligibility guidelines and any intended use of                | N/A   |
| 54 |                                 | professional writers                                                     |       |
| 55 |                                 |                                                                          |       |
| 56 | 31c                             | Plans, if any, for granting public access to the full protocol,          | 18    |
| 57 |                                 | participant-level dataset, and statistical code                          |       |
| 58 |                                 |                                                                          |       |
| 59 |                                 |                                                                          |       |
| 60 | <b>Appendices</b>               |                                                                          |       |

|   |            |    |                                                                        |       |
|---|------------|----|------------------------------------------------------------------------|-------|
| 1 | Informed   |    | Model consent form and other related documentation given to            |       |
| 2 | consent    | 32 | participants and authorised surrogates                                 | 28,29 |
| 3 | materials  |    |                                                                        |       |
| 4 |            |    |                                                                        |       |
| 5 | Biological |    | Plans for collection, laboratory evaluation, and storage of biological |       |
| 6 | specimens  | 33 | specimens for genetic or molecular analysis in the current trial and   | N/A   |
| 7 |            |    | for future use in ancillary studies, if applicable                     |       |
| 8 |            |    |                                                                        |       |

\*It is strongly recommended that this checklist be read in conjunction with the SPIRIT 2013 Explanation & Elaboration for important clarification on the items. Amendments to the protocol should be tracked and dated. The SPIRIT checklist is copyrighted by the SPIRIT Group under the Creative Commons "[Attribution-NonCommercial-NoDerivs 3.0 Unported](#)" license.

Reference: Chan A-W, Tetzlaff JM, Altman DG, et al. SPIRIT 2013 Statement: Defining standard protocol items for clinical trials. *Ann Intern Med.* 2013 Feb 5;158(3):200-207. doi: 10.7326/0003-4819-158-3-201302050-00583.
