# Supplementary material for: De-imFAR phase II project: a study protocol for a cluster randomised implementation trial to evaluate the effectiveness of de-implementation strategies to reduce low-value statin prescribing in the primary prevention of cardiovascular disease
Source: PubMed Central journal article supplement — BMJ Open. 2024 Apr 17;14(4):e078692. doi: 10.1136/bmjopen-2023-078692 (PMC11029292; doi:10.1136/bmjopen-2023-078692), 2024-04-17
Supplement: bmjopen-2023-078692supp002.pdf [file bmjopen-2023-078692supp002.pdf]

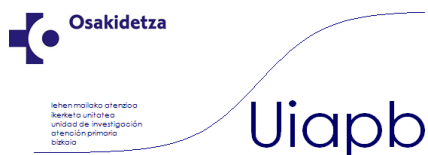

## ***Hoja de Información al Profesional de la salud y Consentimiento Informado***

**Título:** Efectividad de estrategias de de-implementación para favorecer el abandono de prescripciones farmacológicas de bajo valor en prevención primaria de la ECV: proyecto De-imFAR Fase II

**Investigador Principal:** Álvaro Sánchez Pérez

**Servicio/Centro:** Subdirección para la coordinación de atención primaria/Unidad de investigación atención primaria-IIS Biocruces Bizkaia

**Entidad financiadora:** Instituto de salud Carlos III

Apreciado Sr./a,

Osakidetza-Servicio Vasco de Salud, con el propósito de mejorar la calidad en la prestación de servicios de salud hacia la ciudadanía, le invita a participar en el estudio “Efectividad de estrategias de de-implementación para favorecer el abandono de prescripciones farmacológicas de bajo valor en prevención primaria de la ECV: proyecto De-imFAR Fase II”.

Antes de decidir si desea participar, es importante que entienda los objetivos, la importancia de su participación y en qué consistirá, además de qué uso se dará a los datos recogidos y los posibles beneficios y riesgos.

Léalo atentamente y consulte cualquier duda con los miembros del equipo de investigación.

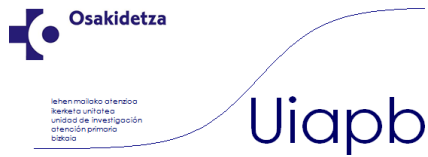

## 1. OBJETO DEL GRUPO DE DISCUSIÓN

El objetivo de los grupos de discusión del Proyecto De-ImFAR es generar conocimiento –a través de las percepciones de los/las profesionales de medicina de atención primaria- sobre la práctica clínica en prevención primaria de eventos cardiovasculares en pacientes de bajo riesgo. A través de una serie de preguntas abiertas se analizarán diferentes aspectos relacionados con el manejo del riesgo cardiovascular en estos pacientes, tratando de conocer la opinión de todos los integrantes del grupo sobre este tema.

No existen respuestas buenas o malas. Cualquier integrante del grupo está invitado a expresar libremente su opinión y a respetar la de los otros integrantes, aunque sea diferente de la suya.

## 2. PARTICIPACIÓN Y RETIRADA DEL ESTUDIO

Este estudio está aprobado por el Comité de Ética de la Investigación con Medicamentos de Euskadi (CEIm-E). Su participación en el mismo es voluntaria y en cualquier momento puede decidir abandonarlo, aunque haya proporcionado el consentimiento y el estudio esté en pleno desarrollo. Además, usted tiene derecho a solicitar al equipo investigador del estudio, en cualquier momento, y sin necesidad de especificar el motivo, la eliminación de sus datos.

## 3. DESARROLLO DEL ESTUDIO

Se realizará una sola entrevista llevada a cabo por dos investigadores con experiencia en métodos de investigación cualitativa, así como en el campo clínico y el proyecto. En dicha entrevista se le harán preguntas sobre su percepción y adaptación a las intervenciones implantadas. La discusión grupal será grabada (en formato audio) con el fin de transcribirla íntegramente. Esto permite a los miembros del equipo participar en la discusión sin necesidad de tomar notas, evitándose así el riesgo de no reflejar fidedignamente las opiniones expresadas por los miembros del grupo.



#### 4. USO Y CONFIDENCIALIDAD DE LOS DATOS

Los datos que se obtengan en el grupo de discusión se utilizarán únicamente con fines de investigación y solamente por parte del equipo de investigación de la Unidad de Investigación de Atención Primaria de Bizkaia (UIAPB). Todas las opiniones expresadas por los/las participantes serán tratadas de manera anónima y confidencial. Se le informa de que no se va a recoger ningún dato de carácter personal.

El estudio cumple lo establecido en el REGLAMENTO (UE) 2016/679 DEL PARLAMENTO EUROPEO Y DEL CONSEJO de 27 de abril de 2016 relativo a la protección de las personas físicas en lo que respecta al tratamiento de datos personales y a la libre circulación de estos datos. Se le solicita también su consentimiento para la realización de este proyecto de investigación conforme a las exigencias del Reglamento Europeo 2016/679 de Protección de Datos y a la Ley Orgánica 3/2018, de 5 de diciembre, de Protección de Datos Personales y garantía de los derechos digitales que deroga la Ley Orgánica 15/1999, de 5 de diciembre, de protección de datos personales. No se cederán datos a terceros, salvo obligación legal.

Para contactar con los responsables del estudio puede dirigirse a:

**Nombre:** Álvaro Sánchez Pérez

**Teléfono:** 946006673

**e-mail:** [alvaro.sanchezperez@osakidetza.eus](mailto:alvaro.sanchezperez@osakidetza.eus)

**Dirección:** Edificio Biocruces 3, Plaza Cruces 12, 48903

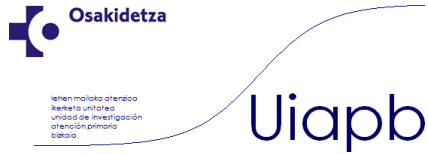

## 5. DECLARACION DEL CONSENTIMIENTO INFORMADO

**Título:** Efectividad de estrategias de de-implementación para favorecer el abandono de prescripciones farmacológicas de bajo valor en prevención primaria de la ECV: proyecto De-imFAR Fase II

**Investigador Principal:** Álvaro Sánchez Pérez

**Servicio/Centro:** Subdirección para la coordinación de atención primaria/Unidad de investigación atención primaria-IIS Biocruces Bizkaia

Yo, Don/Doña....., Médico/a de Atención Primaria del Centro de Salud....., he leído este documento, he comprendido las explicaciones en él facilitadas acerca de la grabación del grupo de discusión y he podido resolver todas las preguntas que he planteado al respecto. Comprendo que mi participación en este ensayo es voluntaria y que puedo retirarme en cualquier momento.

También he sido informado/a de que mis datos personales serán protegidos y serán utilizados únicamente con fines de investigación por el equipo de investigadores de la Unidad de Investigación de Atención Primaria de Bizkaia (UIAPB).

Tomando todo ello en consideración y en tales condiciones, CONSIENTO participar en el grupo de discusión, en la grabación del mismo y en que los datos que se deriven de mi participación sean utilizados para cubrir los objetivos especificados en el documento.

**EN CONSECUENCIA, DOY MI CONSENTIMIENTO PARA PARTICIPAR EN ESTE PROYECTO DE INVESTIGACIÓN.**

.....

Firma del/la médico

.....

Firma del/la responsable del proyecto

.....

Nombre y apellidos

.....

Nombre y apellidos

Fecha ...../...../20.....

Fecha ...../...../20.....

HIP-CI Profesional Versión 2.0 170322  
Código: PI21/00025

4
